# Supplementary material for: Pharmacological Network Reveals the Active Mechanism of Qi-Replenishing, Spleen-Strengthening, Phlegm-Dispelling, and Blood-Nourishing Fufang on Coronary Heart Disease
Source: Evid Based Complement Alternat Med. 2020 Dec 29;2020:1062325. doi: 10.1155/2020/1062325 (PMC7785359; doi:10.1155/2020/1062325)
Supplement: Supplementary Materials — Supplemental Table 1: the 222 components with target records for the four main Chinese medicinal herbs. Supplemental Table 2: the component-target pairs for the important components as screened by ADME. Supplemental Table 3: enriched GO functional terms for the 27 target genes. Supplemental Table 4: enriched KEGG pathways for the 27 target genes. [file 1062325.f1.zip]

Archive with 19 entries (16 files):
- Supplementary files/Supplemental Table 1.xls
- Supplementary files/Supplemental Table 2.xls
- Supplementary files/Supplemental Table 3.xls
- Supplementary files/Supplemental Table 4.xls
- Supplementary files/Supplementary Figure 1/
- Supplementary files/Supplementary Figure 1/Supplementary figure 1.ppt
- Supplementary files/Supplementary Figure 2/
- Supplementary files/Supplementary Figure 2/Sub-figure/
- Supplementary files/Supplementary Figure 2/Sub-figure/ALB.png
- Supplementary files/Supplementary Figure 2/Sub-figure/APOA1.png
- Supplementary files/Supplementary Figure 2/Sub-figure/Astragaloside II.png
- Supplementary files/Supplementary Figure 2/Sub-figure/CYP1A1.png
- Supplementary files/Supplementary Figure 2/Sub-figure/CYP1A2.png
- Supplementary files/Supplementary Figure 2/Sub-figure/IL6.png
- Supplementary files/Supplementary Figure 2/Sub-figure/Neocryptotanshinone II.png
- Supplementary files/Supplementary Figure 2/Sub-figure/NFKB1.png
- Supplementary files/Supplementary Figure 2/Sub-figure/TNF.png
- Supplementary files/Supplementary Figure 2/Supplemental figure 2.psd
- Supplementary files/Supplementary figures.doc
