# Supplementary material for: Pharmacological Network Reveals the Active Mechanism of Qi-Replenishing, Spleen-Strengthening, Phlegm-Dispelling, and Blood-Nourishing Fufang on Coronary Heart Disease
Source: Evid Based Complement Alternat Med. 2020 Dec 29;2020:1062325. doi: 10.1155/2020/1062325 (PMC7785359; doi:10.1155/2020/1062325)
Supplement: Supplementary Materials — Supplemental Table 1: the 222 components with target records for the four main Chinese medicinal herbs. Supplemental Table 2: the component-target pairs for the important components as screened by ADME. Supplemental Table 3: enriched GO functional terms for the 27 target genes. Supplemental Table 4: enriched KEGG pathways for the 27 target genes. [file 1062325.f1.zip › Supplementary files/Supplemental Table 1.xls]

## Sheet: rhizoma Pinelliae
Choline	ID:3589 From TCMID database	5337|PLD1(686.000)	5130|PCYT1A(686.000)	9468|PCYT1B(686.000)	162466|PHOSPHO1(686.000)	43|ACHE(686.000)	5338|PLD2(686.000)	590|BCHE(686.000)	8292|COLQ(55.444)	60482|SLC5A7(22.373)	3162|HMOX1(22.373)	3084|NRG1(22.373)	29958|DMGDH(22.373)	6496|SIX3(22.373)	5909|RAP1GAP(22.373)	1401|CRP(22.373)	222236|NAPEPLD(22.373)	6624|FSCN1(22.373)	8492|PRSS12(22.373)	688|KLF5(22.373)	80736|SLC44A4(22.373)	501|ALDH7A1(22.373)	26052|DNM3(22.373)	122618|PLD4(22.373)	429|ASCL1(22.373)	2822|GPLD1(22.373)	133121|ENPP6(22.373)	1006|CDH8(22.373)	23646|PLD3(22.373)	5420|PODXL(22.373)	2339|FNTA(22.373)	375790|AGRN(22.373)	1119|CHKA(22.373)	55349|CHDH(22.373)	5205|ATP8B1(22.373)	2902|GRIN1(22.373)	5141|PDE4A(8.253)	5139|PDE3A(8.253)	135|ADORA2A(8.253)	134|ADORA1(8.253)	3066|HDAC2(8.253)	1785|DNM2(5.859)	6531|SLC6A3(5.859)	10390|CEPT1(5.859)	2350|FOLR2(5.859)	4640|MYO1A(5.859)	10135|NAMPT(5.859)	351|APP(5.859)	6863|TAC1(5.859)
Protocatechuic Acid-3-Glucoside	ID:31848 From TCMID database	7153|TOP2A(5.785)	203068|TUBB(5.785)	6336|SCN10A(5.785)	759|CA1(5.785)	5465|PPARA(5.785)	7277|TUBA4A(5.785)	7155|TOP2B(5.785)	3980|LIG3(3.351)	2100|ESR2(3.351)	3978|LIG1(3.351)	2099|ESR1(3.351)	462|SERPINC1(3.351)	7150|TOP1(3.351)	3053|SERPIND1(3.351)	2159|F10(3.351)	5742|PTGS1(3.351)	476|ATP1A1(3.351)	5743|PTGS2(3.351)	4759|NEU2(3.351)	266629|SEC14L3(2.608)	6257|RXRB(2.608)	781|CACNA2D1(2.608)	5564|PRKAB1(2.608)	51422|PRKAG2(2.608)	4790|NFKB1(2.608)	148|ADRA1A(2.608)	1909|EDNRA(2.608)	6323|SCN1A(2.608)	7852|CXCR4(2.608)	2555|GABRA2(2.608)	3356|HTR2A(2.608)	2563|GABRD(2.608)	55244|SLC47A1(2.608)	1589|CYP21A2(2.608)	154|ADRB2(2.608)	6646|SOAT1(2.608)	2560|GABRB1(2.608)	1131|CHRM3(2.608)	2246|FGF1(2.608)	4792|NFKBIA(2.608)	2567|GABRG3(2.608)	4547|MTTP(2.608)	1576|CYP3A4(2.608)	7157|TP53(2.608)	1128|CHRM1(2.608)	4985|OPRD1(2.608)	150|ADRA2A(2.608)	3351|HTR1B(2.608)
Conimine	ID:3989 From TCMID database	148|ADRA1A(15.365)	1376|CPT2(15.365)	6571|SLC18A2(15.365)	2562|GABRB3(15.365)	1374|CPT1A(15.365)	3356|HTR2A(8.253)	1137|CHRNA4(8.253)	154|ADRB2(8.253)	2560|GABRB1(8.253)	1131|CHRM3(8.253)	1128|CHRM1(8.253)	3357|HTR2B(8.253)	150|ADRA2A(8.253)	3351|HTR1B(8.253)	1139|CHRNA7(8.253)	3362|HTR6(8.253)	153|ADRB1(8.253)	11255|HRH3(8.253)	10280|SIGMAR1(8.253)	3358|HTR2C(8.253)	146|ADRA1D(8.253)	3352|HTR1D(8.253)	1813|DRD2(8.253)	1136|CHRNA3(8.253)	2561|GABRB2(8.253)	1133|CHRM5(8.253)	6532|SLC6A4(8.253)	3269|HRH1(8.253)	1815|DRD4(8.253)	8973|CHRNA6(8.253)	3350|HTR1A(8.253)	147|ADRA1B(8.253)	152|ADRA2C(8.253)	10857|PGRMC1(8.253)	1814|DRD3(8.253)	1816|DRD5(8.253)	1812|DRD1(8.253)	89832|CHRFAM7A(8.253)	155|ADRB3(8.253)	1129|CHRM2(8.253)	1132|CHRM4(8.253)	151|ADRA2B(8.253)	6530|SLC6A2(8.253)	57030|SLC17A7(5.859)	1586|CYP17A1(5.785)	2099|ESR1(5.785)	5241|PGR(5.785)	367|AR(5.785)
Valine	ID:22308 From TCMID database	586|BCAT1(686.000)	7407|VARS(686.000)	5096|PCCB(686.000)	55699|IARS2(122.778)	6897|TARS(122.778)	51451|LCMT1(122.778)	79896|THNSL1(122.778)	51520|LARS(122.778)	80222|TARS2(122.778)	23395|LARS2(122.778)	36|ACADSB(122.778)	3376|IARS(122.778)	587|BCAT2(122.778)	9836|LCMT2(122.778)	6510|SLC1A5(80.882)	2806|GOT2(80.882)	84706|GPT2(80.882)	570|BAAT(80.882)	51686|OAZ3(80.882)	6470|SHMT1(80.882)	18|ABAT(80.882)	6505|SLC1A1(80.882)	6542|SLC7A2(80.882)	2653|GCSH(80.882)	23428|SLC7A8(80.882)	5471|PPAT(80.882)	91703|ACY3(80.882)	443|ASPA(80.882)	2742|GLRA2(80.882)	211|ALAS1(80.882)	23464|GCAT(80.882)	10991|SLC38A3(80.882)	9054|NFS1(80.882)	10166|SLC25A15(80.882)	6509|SLC1A4(80.882)	122622|ADSSL1(80.882)	7419|VDAC3(80.882)	2937|GSS(80.882)	440|ASNS(80.882)	8001|GLRA3(80.882)	55157|DARS2(80.882)	116444|GRIN3B(80.882)	2903|GRIN2A(80.882)	2805|GOT1(80.882)	27232|GNMT(80.882)	2743|GLRB(80.882)	10249|GLYAT(80.882)	57505|AARS2(80.882)
Threonine	ID:21326 From TCMID database	1719|DHFR(23.000)	5742|PTGS1(23.000)	5743|PTGS2(23.000)	185|AGTR1(23.000)	2350|FOLR2(15.365)	6470|SHMT1(15.365)	18|ABAT(15.365)	9120|SLC16A6(15.365)	23539|SLC16A8(15.365)	2618|GART(15.365)	5091|PC(15.365)	10797|MTHFD2(15.365)	6566|SLC16A1(15.365)	9194|SLC16A7(15.365)	5315|PKM(15.365)	5162|PDHB(15.365)	4548|MTR(15.365)	9121|SLC16A5(15.365)	4522|MTHFD1(15.365)	10840|ALDH1L1(15.365)	275|AMT(15.365)	6567|SLC16A2(15.365)	123263|MTFMT(15.365)	5313|PKLR(15.365)	471|ATIC(15.365)	200895|DHFRL1(15.365)	6472|SHMT2(15.365)	9122|SLC16A4(15.365)	2352|FOLR3(15.365)	10841|FTCD(15.365)	64902|AGXT2(15.365)	9123|SLC16A3(15.365)	7298|TYMS(15.365)	4524|MTHFR(15.365)	57105|CYSLTR2(8.253)	10800|CYSLTR1(8.253)	2099|ESR1(8.253)	5468|PPARG(8.253)	5731|PTGER1(8.253)	4353|MPO(8.253)	5734|PTGER4(8.253)	5241|PGR(8.253)	367|AR(8.253)	2908|NR3C1(8.253)	5915|RARB(8.253)	2357|FPR1(8.253)	5732|PTGER2(8.253)	5733|PTGER3(8.253)
L-Arginine	ID:1673 From TCMID database	819|CAMLG(80.882)	5535|PPP3R2(80.882)	5478|PPIA(80.882)	10105|PPIF(80.882)	7291|TWIST1(55.444)	645142|PPIAL4D(23.000)	367|AR(23.000)	2908|NR3C1(23.000)	730262|PPIAL4E(23.000)	653505|PPIAL4A(23.000)	653598|PPIAL4C(23.000)	476|ATP1A1(23.000)	5534|PPP3R1(23.000)	728945|PPIAL4F(23.000)	89|ACTN3(22.373)	387|RHOA(22.373)	84266|ALKBH7(22.373)	51085|MLXIPL(22.373)	581|BAX(22.373)	11315|PARK7(22.373)	29103|DNAJC15(22.373)	6622|SNCA(22.373)	478|ATP1A3(15.365)	477|ATP1A2(15.365)	27115|PDE7B(8.253)	10381|TUBB3(8.253)	5141|PDE4A(8.253)	8644|AKR1C3(8.253)	135|ADORA2A(8.253)	480|ATP1A4(8.253)	7054|TH(8.253)	5731|PTGER1(8.253)	645|BLVRB(8.253)	7166|TPH1(8.253)	5734|PTGER4(8.253)	5144|PDE4D(8.253)	5053|PAH(8.253)	5150|PDE7A(8.253)	5143|PDE4C(8.253)	5732|PTGER2(8.253)	5733|PTGER3(8.253)	5737|PTGFR(8.253)	55312|RFK(8.253)	4846|NOS3(8.253)	5142|PDE4B(8.253)	134|ADORA1(8.253)	301|ANXA1(8.253)	84275|SLC25A33(5.859)
Gamma-Aminobutyric Acid	ID:23042 From TCMID database	781|CACNA2D1(80.882)	5327|PLAT(80.882)	773|CACNA1A(80.882)	116444|GRIN3B(80.882)	9254|CACNA2D2(80.882)	2903|GRIN2A(80.882)	5340|PLG(80.882)	774|CACNA1B(80.882)	2905|GRIN2C(80.882)	2904|GRIN2B(80.882)	116443|GRIN3A(80.882)	2906|GRIN2D(80.882)	134|ADORA1(80.882)	2902|GRIN1(80.882)	28514|DLL1(55.444)	8737|RIPK1(55.444)	429|ASCL1(55.444)	2053|EPHX2(55.444)	100|ADA(55.444)	9001|HAP1(55.444)	788|SLC25A20(48.000)	55699|IARS2(48.000)	586|BCAT1(48.000)	7407|VARS(48.000)	6897|TARS(48.000)	51451|LCMT1(48.000)	79896|THNSL1(48.000)	4353|MPO(48.000)	123096|SLC25A29(48.000)	6583|SLC22A4(48.000)	1376|CPT2(48.000)	51520|LARS(48.000)	1066|CES1(48.000)	80222|TARS2(48.000)	23395|LARS2(48.000)	36|ACADSB(48.000)	1374|CPT1A(48.000)	5096|PCCB(48.000)	7498|XDH(48.000)	54677|CROT(48.000)	3376|IARS(48.000)	6584|SLC22A5(48.000)	1384|CRAT(48.000)	587|BCAT2(48.000)	9836|LCMT2(48.000)	6510|SLC1A5(23.000)	2806|GOT2(23.000)	84706|GPT2(23.000)
Chrysanthemaxanthin	ID:3592 From TCMID database	100|ADA(23.000)	55846|ITFG2(22.373)	1716|DGUOK(22.373)	7498|XDH(22.373)	134|ADORA1(22.373)	1244|ABCC2(15.365)	2203|FBP1(15.365)	207|AKT1(15.365)	5564|PRKAB1(15.365)	90|ACVR1(15.365)	439|ASNA1(15.365)	157|ADRBK2(15.365)	55902|ACSS2(15.365)	94|ACVRL1(15.365)	107|ADCY1(15.365)	22978|NT5C2(15.365)	269|AMHR2(15.365)	10188|TNK2(15.365)	440|ASNS(15.365)	132|ADK(15.365)	27|ABL2(15.365)	156|ADRBK1(15.365)	5144|PDE4D(15.365)	2977|GUCY1A2(15.365)	292|SLC25A5(15.365)	5562|PRKAA1(15.365)	10060|ABCC9(15.365)	1385|CREB1(15.365)	84532|ACSS1(15.365)	5292|PIM1(15.365)	5836|PYGL(15.365)	25|ABL1(15.365)	10939|AFG3L2(15.365)	65061|CDK15(15.365)	3094|HINT1(15.365)	445|ASS1(15.365)	91|ACVR1B(15.365)	2180|ACSL1(15.365)	19|ABCA1(15.365)	293|SLC25A6(15.365)	5142|PDE4B(15.365)	8883|NAE1(15.365)	5565|PRKAB2(15.365)	1786|DNMT1(15.365)	317|APAF1(15.365)	6833|ABCC8(15.365)	238|ALK(15.365)	8647|ABCB11(15.365)
1-Octene	ID:15971 From TCMID database	3750|KCND1(80.882)	3738|KCNA3(80.882)	5564|PRKAB1(80.882)	124|ADH1A(80.882)	3744|KCNA10(80.882)	2593|GAMT(80.882)	3748|KCNC3(80.882)	3736|KCNA1(80.882)	3737|KCNA2(80.882)	7173|TPO(80.882)	847|CAT(80.882)	3745|KCNB1(80.882)	125|ADH1B(80.882)	1742|DLG4(80.882)	3747|KCNC2(80.882)	3746|KCNC1(80.882)	126|ADH1C(80.882)	9312|KCNB2(80.882)	3741|KCNA5(80.882)	6035|RNASE1(80.882)	3751|KCND2(80.882)	217|ALDH2(80.882)	3739|KCNA4(80.882)	3743|KCNA7(80.882)	3742|KCNA6(80.882)	3752|KCND3(80.882)	2983|GUCY1B3(55.444)	2628|GATM(55.444)	50801|KCNK4(55.444)	389434|IYD(55.444)	3784|KCNQ1(55.444)	2203|FBP1(22.373)	9162|DGKI(22.373)	131|ADH7(22.373)	4781|NFIB(22.373)	114757|CYGB(22.373)	9369|NRXN3(22.373)	94030|LRRC4B(22.373)	343|AQP8(22.373)	170302|ARX(22.373)	3479|IGF1(22.373)	85358|SHANK3(22.373)	91703|ACY3(22.373)	443|ASPA(22.373)	9378|NRXN1(22.373)	1906|EDN1(22.373)	5020|OXT(22.373)	9863|MAGI2(22.373)
Beta-Sitosterol-3-O-Beta-D-Xylopyranoside	ID:31938 From TCMID database	7054|TH(8.253)	7166|TPH1(8.253)	5053|PAH(8.253)	476|ATP1A1(8.253)	4846|NOS3(8.253)	7852|CXCR4(5.785)	2548|GAA(5.785)	8972|MGAM(5.785)	55244|SLC47A1(5.785)	2100|ESR2(5.785)	1576|CYP3A4(5.785)	2099|ESR1(5.785)	8001|GLRA3(5.785)	4791|NFKB2(5.785)	7124|TNF(5.785)	3284|HSD3B2(5.785)	5740|PTGIS(5.785)	4318|MMP9(5.785)	1595|CYP51A1(5.785)	5241|PGR(5.785)	367|AR(5.785)	2908|NR3C1(5.785)	64805|P2RY12(5.785)	5739|PTGIR(5.785)	3458|IFNG(5.785)	3283|HSD3B1(5.785)	3156|HMGCR(5.785)	279|AMY2A(5.785)	3757|KCNH2(5.785)	3689|ITGB2(5.785)	1719|DHFR(5.785)	6608|SMO(5.785)	2562|GABRB3(5.785)	6476|SI(5.785)	2862|MLNR(5.785)	28234|SLCO1B3(5.785)	4036|LRP2(5.785)	301|ANXA1(5.785)	3683|ITGAL(5.785)	213|ALB(5.785)	3066|HDAC2(5.785)	7421|VDR(5.785)	5243|ABCB1(5.785)	10599|SLCO1B1(5.785)	4306|NR3C2(5.785)	1244|ABCC2(3.351)	2203|FBP1(3.351)	207|AKT1(3.351)
Phenylalanine	ID:17079 From TCMID database	23428|SLC7A8(686.000)	7054|TH(686.000)	6898|TAT(686.000)	10667|FARS2(686.000)	5053|PAH(686.000)	2193|FARSA(686.000)	10056|FARSB(686.000)	8565|YARS(122.778)	51067|YARS2(122.778)	83875|BCO2(55.444)	5409|PNMT(55.444)	1644|DDC(55.444)	6531|SLC6A3(48.000)	468|ATF4(48.000)	148|ADRA1A(48.000)	154|ADRB2(48.000)	122953|JDP2(48.000)	3558|IL2(48.000)	150|ADRA2A(48.000)	467|ATF3(48.000)	7124|TNF(48.000)	4129|MAOB(48.000)	1386|ATF2(48.000)	466|ATF1(48.000)	153|ADRB1(48.000)	4772|NFATC1(48.000)	146|ADRA1D(48.000)	1813|DRD2(48.000)	22809|ATF5(48.000)	3725|JUN(48.000)	4128|MAOA(48.000)	6532|SLC6A4(48.000)	43|ACHE(48.000)	6571|SLC18A2(48.000)	9568|GABBR2(48.000)	11016|ATF7(48.000)	1815|DRD4(48.000)	147|ADRA1B(48.000)	152|ADRA2C(48.000)	1814|DRD3(48.000)	1816|DRD5(48.000)	22926|ATF6(48.000)	1812|DRD1(48.000)	155|ADRB3(48.000)	2550|GABBR1(48.000)	134864|TAAR1(48.000)	9607|CARTPT(48.000)	151|ADRA2B(48.000)
Gamma-Sitosterol	ID:29509 From TCMID database	2099|ESR1(122.778)	5241|PGR(122.778)	7421|VDR(80.882)	1594|CYP27B1(80.882)	2638|GC(55.444)	22938|SNW1(55.444)	367|AR(48.000)	2908|NR3C1(48.000)	4790|NFKB1(22.373)	8644|AKR1C3(22.373)	1591|CYP24A1(22.373)	151306|GPBAR1(22.373)	6591|SNAI2(22.373)	5469|MED1(22.373)	6615|SNAI1(22.373)	1576|CYP3A4(22.373)	793|CALB1(22.373)	8074|FGF23(22.373)	2672|GFI1(22.373)	55915|LANCL2(22.373)	54361|WNT4(22.373)	6929|TCF3(22.373)	581|BAX(22.373)	9365|KL(22.373)	120227|CYP2R1(22.373)	5371|PML(22.373)	2683|B4GALT1(22.373)	795|S100G(22.373)	1593|CYP27A1(22.373)	25959|KANK2(22.373)	10265|IRX5(22.373)	6256|RXRA(22.373)	9971|NR1H4(22.373)	8805|TRIM24(22.373)	1586|CYP17A1(15.365)	162514|TRPV3(15.365)	4986|OPRK1(15.365)	79054|TRPM8(15.365)	8989|TRPA1(15.365)	7054|TH(8.253)	5731|PTGER1(8.253)	7166|TPH1(8.253)	5053|PAH(8.253)	5733|PTGER3(8.253)	476|ATP1A1(8.253)	5737|PTGFR(8.253)	4846|NOS3(8.253)	51293|CD320(5.859)
Methyl Eicosanoate	ID:14328 From TCMID database	4881|NPR1(80.882)	11280|SCN11A(48.000)	6327|SCN2B(48.000)	18|ABAT(48.000)	6323|SCN1A(48.000)	2104|ESRRG(48.000)	55800|SCN3B(48.000)	1345|COX6C(48.000)	1329|COX5B(48.000)	1350|COX7C(48.000)	4512|COX1(48.000)	6328|SCN3A(48.000)	1646|AKR1C2(48.000)	6332|SCN7A(48.000)	6331|SCN5A(48.000)	6336|SCN10A(48.000)	6718|AKR1D1(48.000)	7915|ALDH5A1(48.000)	6326|SCN2A(48.000)	9377|COX5A(48.000)	4514|COX3(48.000)	367|AR(48.000)	1346|COX7A1(48.000)	2235|FECH(48.000)	1327|COX4I1(48.000)	9734|HDAC9(48.000)	5319|PLA2G1B(48.000)	1339|COX6A2(48.000)	7299|TYR(48.000)	6335|SCN9A(48.000)	6329|SCN4A(48.000)	6330|SCN4B(48.000)	126|ADH1C(48.000)	1340|COX6B1(48.000)	2172|FABP6(48.000)	1066|CES1(48.000)	6716|SRD5A2(48.000)	36|ACADSB(48.000)	6334|SCN8A(48.000)	1349|COX7B(48.000)	6324|SCN1B(48.000)	4513|COX2(48.000)	4967|OGDH(48.000)	3066|HDAC2(48.000)	1351|COX8A(48.000)	9971|NR1H4(48.000)	4883|NPR3(22.373)	4882|NPR2(22.373)
Guanosine	ID:9070 From TCMID database	5422|POLA1(122.778)	135|ADORA2A(80.882)	5423|POLB(80.882)	1786|DNMT1(80.882)	4860|PNP(48.000)	136|ADORA2B(48.000)	140|ADORA3(48.000)	134|ADORA1(48.000)	6947|TCN1(23.000)	4594|MUT(23.000)	326625|MMAB(23.000)	4552|MTRR(23.000)	4548|MTR(23.000)	8029|CUBN(23.000)	81693|AMN(23.000)	25974|MMACHC(23.000)	166785|MMAA(23.000)	29128|UHRF1(22.373)	1788|DNMT3A(22.373)	5426|POLE(22.373)	672|BRCA1(22.373)	5591|PRKDC(22.373)	23028|KDM1A(22.373)	5428|POLG(22.373)	3981|LIG4(22.373)	7874|USP7(22.373)	6929|TCF3(22.373)	5424|POLD1(22.373)	5079|PAX5(22.373)	1787|TRDMT1(22.373)	6865|TACR2(22.373)	115426|UHRF2(22.373)	1789|DNMT3B(22.373)	10664|CTCF(22.373)	55818|KDM3A(22.373)	4255|MGMT(22.373)	3070|HELLS(22.373)	1244|ABCC2(15.365)	2203|FBP1(15.365)	207|AKT1(15.365)	5564|PRKAB1(15.365)	90|ACVR1(15.365)	439|ASNA1(15.365)	157|ADRBK2(15.365)	55902|ACSS2(15.365)	94|ACVRL1(15.365)	107|ADCY1(15.365)	22978|NT5C2(15.365)
(S)-Serine	ID:19744 From TCMID database	875|CBS(1626.000)	10558|SPTLC1(1626.000)	102724560|CBSL(1626.000)	9517|SPTLC2(1626.000)	189|AGXT(1626.000)	6301|SARS(1626.000)	10993|SDS(1626.000)	63826|SRR(1626.000)	113675|SDSL(714.000)	55304|SPTLC3(714.000)	84706|GPT2(122.778)	18|ABAT(122.778)	23428|SLC7A8(122.778)	9054|NFS1(122.778)	6509|SLC1A4(122.778)	57505|AARS2(122.778)	85007|PHYKPL(122.778)	2875|GPT(122.778)	16|AARS(122.778)	206358|SLC36A1(122.778)	64902|AGXT2(122.778)	8942|KYNU(122.778)	113451|AZIN2(114.143)	435|ASL(114.143)	6897|TARS(114.143)	79896|THNSL1(114.143)	4843|NOS2(114.143)	84889|SLC7A3(114.143)	80222|TARS2(114.143)	445|ASS1(114.143)	6541|SLC7A1(114.143)	6545|SLC7A4(114.143)	4846|NOS3(114.143)	384|ARG2(114.143)	65010|SLC26A6(55.444)	4552|MTRR(55.444)	1610|DAO(55.444)	94103|ORMDL3(55.444)	54938|SARS2(55.444)	1491|CTH(55.444)	2950|GSTP1(55.444)	570|BAAT(48.000)	6470|SHMT1(48.000)	2653|GCSH(48.000)	2742|GLRA2(48.000)	211|ALAS1(48.000)	586|BCAT1(48.000)	23464|GCAT(48.000)
Dauricine	ID:4684 From TCMID database	43|ACHE(122.778)	1135|CHRNA2(122.778)	3359|HTR3A(122.778)	1129|CHRM2(122.778)	3356|HTR2A(48.000)	1131|CHRM3(48.000)	3357|HTR2B(48.000)	150|ADRA2A(48.000)	3351|HTR1B(48.000)	3358|HTR2C(48.000)	3352|HTR1D(48.000)	1813|DRD2(48.000)	6571|SLC18A2(48.000)	1815|DRD4(48.000)	3350|HTR1A(48.000)	152|ADRA2C(48.000)	50632|CALY(48.000)	1814|DRD3(48.000)	1816|DRD5(48.000)	1812|DRD1(48.000)	590|BCHE(48.000)	151|ADRA2B(48.000)	2100|ESR2(15.365)	4985|OPRD1(15.365)	2099|ESR1(15.365)	4986|OPRK1(15.365)	4988|OPRM1(15.365)	1146|CHRNG(8.253)	1535|CYBA(8.253)	3775|KCNK1(8.253)	148|ADRA1A(8.253)	1137|CHRNA4(8.253)	5880|RAC2(8.253)	1142|CHRNB3(8.253)	5879|RAC1(8.253)	1128|CHRM1(8.253)	4689|NCF4(8.253)	1139|CHRNA7(8.253)	3362|HTR6(8.253)	6331|SCN5A(8.253)	1536|CYBB(8.253)	1134|CHRNA1(8.253)	653361|NCF1(8.253)	10280|SIGMAR1(8.253)	57053|CHRNA10(8.253)	146|ADRA1D(8.253)	4688|NCF2(8.253)	1136|CHRNA3(8.253)
Beta-Aminobutyric Acid	ID:23660 From TCMID database	781|CACNA2D1(80.882)	5327|PLAT(80.882)	773|CACNA1A(80.882)	116444|GRIN3B(80.882)	9254|CACNA2D2(80.882)	2903|GRIN2A(80.882)	5340|PLG(80.882)	774|CACNA1B(80.882)	2905|GRIN2C(80.882)	2904|GRIN2B(80.882)	116443|GRIN3A(80.882)	2906|GRIN2D(80.882)	134|ADORA1(80.882)	2902|GRIN1(80.882)	28514|DLL1(55.444)	8737|RIPK1(55.444)	429|ASCL1(55.444)	2053|EPHX2(55.444)	100|ADA(55.444)	9001|HAP1(55.444)	2806|GOT2(48.000)	6505|SLC1A1(48.000)	91703|ACY3(48.000)	2560|GABRB1(48.000)	443|ASPA(48.000)	55699|IARS2(48.000)	586|BCAT1(48.000)	7407|VARS(48.000)	122622|ADSSL1(48.000)	6897|TARS(48.000)	440|ASNS(48.000)	55157|DARS2(48.000)	51451|LCMT1(48.000)	79896|THNSL1(48.000)	2805|GOT1(48.000)	79581|SLC52A2(48.000)	444|ASPH(48.000)	8604|SLC25A12(48.000)	51520|LARS(48.000)	1615|DARS(48.000)	80150|ASRGL1(48.000)	80222|TARS2(48.000)	23395|LARS2(48.000)	6035|RNASE1(48.000)	445|ASS1(48.000)	159|ADSS(48.000)	36|ACADSB(48.000)	790|CAD(48.000)
Proline	ID:17891 From TCMID database	10536|P3H3(686.000)	9360|PPIG(686.000)	5480|PPIC(686.000)	5831|PYCR1(686.000)	5625|PRODH(686.000)	25973|PARS2(686.000)	5478|PPIA(686.000)	11254|SLC6A14(686.000)	10105|PPIF(686.000)	2058|EPRS(686.000)	5033|P4HA1(686.000)	10465|PPIH(686.000)	29920|PYCR2(686.000)	112849|L3HYPDH(686.000)	11212|PROSC(686.000)	65263|PYCRL(686.000)	55214|P3H2(686.000)	6534|SLC6A7(686.000)	8974|P4HA2(686.000)	64175|P3H1(686.000)	5479|PPIB(686.000)	7291|TWIST1(55.444)	10491|CRTAP(55.444)	124454|EARS2(55.444)	58510|PRODH2(55.444)	5034|P4HB(55.444)	51686|OAZ3(48.000)	6542|SLC7A2(48.000)	10166|SLC25A15(48.000)	4048|LTA4H(48.000)	4318|MMP9(48.000)	4313|MMP2(48.000)	2628|GATM(48.000)	383|ARG1(48.000)	4942|OAT(48.000)	1636|ACE(48.000)	4947|OAZ2(48.000)	83884|SLC25A2(48.000)	84889|SLC7A3(48.000)	4946|OAZ1(48.000)	6541|SLC7A1(48.000)	6545|SLC7A4(48.000)	5009|OTC(48.000)	384|ARG2(48.000)	210|ALAD(48.000)	645142|PPIAL4D(23.000)	730262|PPIAL4E(23.000)	653505|PPIAL4A(23.000)
Homogentisic Acid	ID:23597 From TCMID database	10381|TUBB3(15.365)	1962|EHHADH(15.365)	1131|CHRM3(15.365)	51174|TUBD1(15.365)	1128|CHRM1(15.365)	51807|TUBA8(15.365)	203068|TUBB(15.365)	27175|TUBG2(15.365)	10382|TUBB4A(15.365)	112714|TUBA3E(15.365)	84617|TUBB6(15.365)	51175|TUBE1(15.365)	347688|TUBB8(15.365)	347733|TUBB2B(15.365)	3725|JUN(15.365)	1133|CHRM5(15.365)	10383|TUBB4B(15.365)	1135|CHRNA2(15.365)	7278|TUBA3C(15.365)	84790|TUBA1C(15.365)	7280|TUBB2A(15.365)	6476|SI(15.365)	10376|TUBA1B(15.365)	3359|HTR3A(15.365)	7277|TUBA4A(15.365)	1129|CHRM2(15.365)	1132|CHRM4(15.365)	7283|TUBG1(15.365)	113457|TUBA3D(15.365)	7846|TUBA1A(15.365)	3764|KCNJ8(8.253)	3768|KCNJ12(8.253)	3356|HTR2A(8.253)	55244|SLC47A1(8.253)	1576|CYP3A4(8.253)	3357|HTR2B(8.253)	150|ADRA2A(8.253)	3351|HTR1B(8.253)	3767|KCNJ11(8.253)	1595|CYP51A1(8.253)	3614|IMPDH1(8.253)	3772|KCNJ15(8.253)	6570|SLC18A1(8.253)	3358|HTR2C(8.253)	3352|HTR1D(8.253)	1813|DRD2(8.253)	3757|KCNH2(8.253)	6571|SLC18A2(8.253)
Bis(4-Hydroxybenzyl) Ether	ID:30670 From TCMID database	7299|TYR(48.000)	6531|SLC6A3(5.785)	3779|KCNMB1(5.785)	3780|KCNN1(5.785)	148|ADRA1A(5.785)	30814|PLA2G2E(5.785)	2555|GABRA2(5.785)	5594|MAPK1(5.785)	2563|GABRD(5.785)	154|ADRB2(5.785)	2560|GABRB1(5.785)	2567|GABRG3(5.785)	3781|KCNN2(5.785)	150|ADRA2A(5.785)	116444|GRIN3B(5.785)	7124|TNF(5.785)	5468|PPARG(5.785)	6336|SCN10A(5.785)	2564|GABRE(5.785)	8503|PIK3R3(5.785)	4129|MAOB(5.785)	6326|SCN2A(5.785)	2556|GABRA3(5.785)	153|ADRB1(5.785)	4353|MPO(5.785)	5295|PIK3R1(5.785)	2565|GABRG1(5.785)	2568|GABRP(5.785)	6570|SLC18A1(5.785)	146|ADRA1D(5.785)	2557|GABRA4(5.785)	5053|PAH(5.785)	1645|AKR1C1(5.785)	2561|GABRB2(5.785)	4128|MAOA(5.785)	3269|HRH1(5.785)	6571|SLC18A2(5.785)	6329|SCN4A(5.785)	55879|GABRQ(5.785)	1135|CHRNA2(5.785)	5742|PTGS1(5.785)	147|ADRA1B(5.785)	152|ADRA2C(5.785)	3783|KCNN4(5.785)	5743|PTGS2(5.785)	240|ALOX5(5.785)	2562|GABRB3(5.785)	116443|GRIN3A(5.785)
L-Histidine	ID:9568 From TCMID database	10991|SLC38A3(122.778)	3067|HDC(122.778)	3034|HAL(122.778)	3035|HARS(122.778)	10352|WARS2(80.882)	7453|WARS(80.882)	5105|PCK1(55.444)	10394|PRG3(55.444)	55238|SLC38A7(55.444)	23438|HARS2(55.444)	23428|SLC7A8(23.000)	2207|FCER1G(23.000)	7054|TH(23.000)	6898|TAT(23.000)	10667|FARS2(23.000)	5053|PAH(23.000)	2193|FARSA(23.000)	2205|FCER1A(23.000)	10056|FARSB(23.000)	6510|SLC1A5(22.373)	6509|SLC1A4(22.373)	144193|AMDHD1(22.373)	25902|MTHFD1L(22.373)	7200|TRH(22.373)	113675|SDSL(22.373)	83875|BCO2(22.373)	5409|PNMT(22.373)	10560|SLC19A2(22.373)	3176|HNMT(22.373)	3725|JUN(22.373)	3952|LEP(22.373)	131669|UROC1(22.373)	1644|DDC(22.373)	56918|C2orf83(22.373)	10841|FTCD(22.373)	718|C3(22.373)	10993|SDS(22.373)	80704|SLC19A3(22.373)	2206|MS4A2(22.373)	6850|SYK(22.373)	10588|MTHFS(22.373)	63826|SRR(22.373)	2806|GOT2(15.365)	84706|GPT2(15.365)	570|BAAT(15.365)	51686|OAZ3(15.365)	6470|SHMT1(15.365)	18|ABAT(15.365)
Homoharringtonine	ID:9608 From TCMID database	6122|RPL3(686.000)	6123|RPL3L(23.000)	1128|CHRM1(15.365)	10381|TUBB3(8.253)	3764|KCNJ8(8.253)	3768|KCNJ12(8.253)	3356|HTR2A(8.253)	1962|EHHADH(8.253)	1131|CHRM3(8.253)	51174|TUBD1(8.253)	4985|OPRD1(8.253)	3357|HTR2B(8.253)	51807|TUBA8(8.253)	150|ADRA2A(8.253)	3351|HTR1B(8.253)	203068|TUBB(8.253)	27175|TUBG2(8.253)	10382|TUBB4A(8.253)	112714|TUBA3E(8.253)	7150|TOP1(8.253)	84617|TUBB6(8.253)	3767|KCNJ11(8.253)	51175|TUBE1(8.253)	3772|KCNJ15(8.253)	347688|TUBB8(8.253)	3358|HTR2C(8.253)	3352|HTR1D(8.253)	1813|DRD2(8.253)	347733|TUBB2B(8.253)	3725|JUN(8.253)	4986|OPRK1(8.253)	1133|CHRM5(8.253)	4988|OPRM1(8.253)	3269|HRH1(8.253)	10383|TUBB4B(8.253)	1135|CHRNA2(8.253)	7278|TUBA3C(8.253)	3766|KCNJ10(8.253)	3350|HTR1A(8.253)	152|ADRA2C(8.253)	84790|TUBA1C(8.253)	1814|DRD3(8.253)	7280|TUBB2A(8.253)	10376|TUBA1B(8.253)	116447|TOP1MT(8.253)	3758|KCNJ1(8.253)	7277|TUBA4A(8.253)	1129|CHRM2(8.253)
Coniine	ID:3988 From TCMID database	1376|CPT2(122.778)	1374|CPT1A(122.778)	2562|GABRB3(80.882)	57053|CHRNA10(48.000)	1136|CHRNA3(48.000)	43|ACHE(48.000)	6571|SLC18A2(48.000)	1135|CHRNA2(48.000)	1143|CHRNB4(48.000)	134864|TAAR1(48.000)	1375|CPT1B(22.373)	126129|CPT1C(22.373)	54677|CROT(22.373)	1384|CRAT(22.373)	3356|HTR2A(15.365)	1137|CHRNA4(15.365)	2560|GABRB1(15.365)	3357|HTR2B(15.365)	150|ADRA2A(15.365)	3351|HTR1B(15.365)	1139|CHRNA7(15.365)	11255|HRH3(15.365)	3358|HTR2C(15.365)	3352|HTR1D(15.365)	1813|DRD2(15.365)	2561|GABRB2(15.365)	3269|HRH1(15.365)	1815|DRD4(15.365)	8973|CHRNA6(15.365)	3350|HTR1A(15.365)	152|ADRA2C(15.365)	1814|DRD3(15.365)	1816|DRD5(15.365)	1812|DRD1(15.365)	89832|CHRFAM7A(15.365)	151|ADRA2B(15.365)	207|AKT1(5.859)	788|SLC25A20(5.859)	10891|PPARGC1A(5.859)	83752|LONP2(5.859)	51422|PRKAG2(5.859)	1788|DNMT3A(5.859)	6470|SHMT1(5.859)	85413|SLC22A16(5.859)	7291|TWIST1(5.859)	29958|DMGDH(5.859)	32|ACACB(5.859)	135|ADORA2A(5.859)
9-Heptadecanol	ID:9379 From TCMID database	162514|TRPV3(122.778)	4986|OPRK1(122.778)	79054|TRPM8(122.778)	8989|TRPA1(122.778)	50801|KCNK4(55.444)	11280|SCN11A(48.000)	6327|SCN2B(48.000)	18|ABAT(48.000)	6323|SCN1A(48.000)	55800|SCN3B(48.000)	6328|SCN3A(48.000)	6332|SCN7A(48.000)	6331|SCN5A(48.000)	6336|SCN10A(48.000)	6718|AKR1D1(48.000)	7915|ALDH5A1(48.000)	6326|SCN2A(48.000)	9734|HDAC9(48.000)	7299|TYR(48.000)	6335|SCN9A(48.000)	6329|SCN4A(48.000)	6330|SCN4B(48.000)	6716|SRD5A2(48.000)	36|ACADSB(48.000)	6334|SCN8A(48.000)	6324|SCN1B(48.000)	4967|OGDH(48.000)	3066|HDAC2(48.000)	89|ACTN3(22.373)	6863|TAC1(22.373)	4804|NGFR(22.373)	150|ADRA2A(22.373)	7442|TRPV1(22.373)	2255|FGF10(22.373)	7415|VCP(22.373)	3091|HIF1A(22.373)	664|BNIP3(22.373)	1392|CRH(22.373)	4747|NEFL(22.373)	90226|UCN2(22.373)	6608|SMO(22.373)	6865|TACR2(22.373)	358|AQP1(22.373)	255061|TAC4(22.373)	1001|CDH3(22.373)	863|CBFA2T3(22.373)	4744|NEFH(22.373)	1395|CRHR2(22.373)
(S)-Tyrosine	ID:22153 From TCMID database	7054|TH(known target in DrugBank,TTD)	6898|TAT(known target in DrugBank)	8565|YARS(known target in DrugBank)	51067|YARS2(known target in DrugBank)	121278|TPH2(133.125)	7166|TPH1(133.125)	5053|PAH(133.125)	23428|SLC7A8(122.778)	150|ADRA2A(122.778)	10667|FARS2(122.778)	1813|DRD2(122.778)	2193|FARSA(122.778)	1644|DDC(122.778)	1815|DRD4(122.778)	1814|DRD3(122.778)	10056|FARSB(122.778)	1816|DRD5(122.778)	1812|DRD1(122.778)	83875|BCO2(55.444)	5409|PNMT(55.444)	3576|CXCL8(55.444)	4935|GPR143(55.444)	148|ADRA1A(48.000)	154|ADRB2(48.000)	153|ADRB1(48.000)	146|ADRA1D(48.000)	9568|GABBR2(48.000)	147|ADRA1B(48.000)	152|ADRA2C(48.000)	155|ADRB3(48.000)	2550|GABBR1(48.000)	151|ADRA2B(48.000)	6530|SLC6A2(48.000)	6531|SLC6A3(25.857)	6897|TARS(25.857)	79896|THNSL1(25.857)	6570|SLC18A1(25.857)	6532|SLC6A4(25.857)	6571|SLC18A2(25.857)	3363|HTR7(25.857)	3350|HTR1A(25.857)	1621|DBH(25.857)	80222|TARS2(25.857)	6327|SCN2B(22.373)	2806|GOT2(22.373)	883|CCBL1(22.373)	1788|DNMT3A(22.373)	3081|HGD(22.373)
Ephedrine	ID:6814 From TCMID database	6531|SLC6A3(686.000)	468|ATF4(686.000)	148|ADRA1A(686.000)	154|ADRB2(686.000)	122953|JDP2(686.000)	3558|IL2(686.000)	150|ADRA2A(686.000)	467|ATF3(686.000)	7124|TNF(686.000)	1386|ATF2(686.000)	466|ATF1(686.000)	153|ADRB1(686.000)	4772|NFATC1(686.000)	22809|ATF5(686.000)	3725|JUN(686.000)	6532|SLC6A4(686.000)	43|ACHE(686.000)	6571|SLC18A2(686.000)	11016|ATF7(686.000)	22926|ATF6(686.000)	2353|FOS(686.000)	6530|SLC6A2(686.000)	1812|DRD1(122.778)	333|APLP1(55.444)	57030|SLC17A7(55.444)	1649|DDIT3(55.444)	409|ARRB2(55.444)	7879|RAB7A(55.444)	6570|SLC18A1(55.444)	51286|CEND1(55.444)	3559|IL2RA(55.444)	11315|PARK7(55.444)	8292|COLQ(55.444)	10241|CALCOCO2(55.444)	1385|CREB1(55.444)	7481|WNT11(55.444)	1601|DAB2(55.444)	6580|SLC22A1(55.444)	152|ADRA2C(55.444)	590|BCHE(55.444)	4049|LTA(55.444)	9709|HERPUD1(55.444)	6256|RXRA(55.444)	5594|MAPK1(48.000)	23428|SLC7A8(48.000)	7054|TH(48.000)	8503|PIK3R3(48.000)	4129|MAOB(48.000)
L-Alanine	ID:832 From TCMID database	84706|GPT2(686.000)	18|ABAT(686.000)	23428|SLC7A8(686.000)	9054|NFS1(686.000)	6509|SLC1A4(686.000)	57505|AARS2(686.000)	85007|PHYKPL(686.000)	2875|GPT(686.000)	16|AARS(686.000)	189|AGXT(686.000)	206358|SLC36A1(686.000)	64902|AGXT2(686.000)	8942|KYNU(686.000)	875|CBS(122.778)	10558|SPTLC1(122.778)	102724560|CBSL(122.778)	9517|SPTLC2(122.778)	6301|SARS(122.778)	10993|SDS(122.778)	63826|SRR(122.778)	6510|SLC1A5(80.882)	2806|GOT2(80.882)	570|BAAT(80.882)	51686|OAZ3(80.882)	6470|SHMT1(80.882)	6505|SLC1A1(80.882)	6542|SLC7A2(80.882)	2653|GCSH(80.882)	5471|PPAT(80.882)	91703|ACY3(80.882)	443|ASPA(80.882)	55699|IARS2(80.882)	2742|GLRA2(80.882)	211|ALAS1(80.882)	586|BCAT1(80.882)	23464|GCAT(80.882)	10991|SLC38A3(80.882)	7407|VARS(80.882)	10166|SLC25A15(80.882)	122622|ADSSL1(80.882)	7419|VDAC3(80.882)	2937|GSS(80.882)	440|ASNS(80.882)	8001|GLRA3(80.882)	55157|DARS2(80.882)	116444|GRIN3B(80.882)	51451|LCMT1(80.882)	2903|GRIN2A(80.882)
Methionine	ID:13816 From TCMID database	23743|BHMT2(686.000)	4552|MTRR(686.000)	10988|METAP2(686.000)	4548|MTR(686.000)	635|BHMT(686.000)	2950|GSTP1(80.882)	7186|TRAF2(55.444)	875|CBS(55.444)	1312|COMT(55.444)	6510|SLC1A5(23.000)	2806|GOT2(23.000)	84706|GPT2(23.000)	570|BAAT(23.000)	51686|OAZ3(23.000)	6470|SHMT1(23.000)	18|ABAT(23.000)	6505|SLC1A1(23.000)	6542|SLC7A2(23.000)	2653|GCSH(23.000)	23428|SLC7A8(23.000)	5471|PPAT(23.000)	91703|ACY3(23.000)	443|ASPA(23.000)	55699|IARS2(23.000)	2742|GLRA2(23.000)	211|ALAS1(23.000)	586|BCAT1(23.000)	23464|GCAT(23.000)	10991|SLC38A3(23.000)	7407|VARS(23.000)	9054|NFS1(23.000)	10166|SLC25A15(23.000)	6509|SLC1A4(23.000)	122622|ADSSL1(23.000)	7419|VDAC3(23.000)	2937|GSS(23.000)	440|ASNS(23.000)	8001|GLRA3(23.000)	55157|DARS2(23.000)	116444|GRIN3B(23.000)	51451|LCMT1(23.000)	2903|GRIN2A(23.000)	2805|GOT1(23.000)	27232|GNMT(23.000)	2743|GLRB(23.000)	10249|GLYAT(23.000)	57505|AARS2(23.000)	444|ASPH(23.000)
Trigonelline	ID:21646 From TCMID database	5327|PLAT(80.882)	338442|HCAR2(80.882)	7056|THBD(80.882)	5468|PPARG(80.882)	23475|QPRT(80.882)	596|BCL2(80.882)	2169|FABP2(80.882)	1080|CFTR(80.882)	8843|HCAR3(80.882)	5742|PTGS1(80.882)	5743|PTGS2(80.882)	4837|NNMT(80.882)	336|APOA2(55.444)	9747|TCAF1(55.444)	3553|IL1B(55.444)	3596|IL13(55.444)	114899|C1QTNF3(55.444)	9992|KCNE2(55.444)	301|ANXA1(55.444)	8710|SERPINB7(55.444)	57026|PDXP(22.373)	57447|NDRG2(22.373)	554235|ASPDH(22.373)	474|ATOH1(22.373)	9497|SLC4A7(22.373)	27035|NOX1(22.373)	10135|NAMPT(22.373)	28984|RGCC(22.373)	23411|SIRT1(22.373)	4804|NGFR(22.373)	252995|FNDC5(22.373)	26056|RAB11FIP5(22.373)	10062|NR1H3(22.373)	80070|ADAMTS20(22.373)	22933|SIRT2(22.373)	114882|OSBPL8(22.373)	766|CA7(22.373)	4617|MYF5(22.373)	130013|ACMSD(22.373)	552|AVPR1A(22.373)	5611|DNAJC3(22.373)	338440|ANO9(22.373)	6474|SHOX2(22.373)	4254|KITLG(22.373)	356|FASLG(22.373)	3690|ITGB3(22.373)	7157|TP53(22.373)	5591|PRKDC(22.373)
Glycine	ID:8816 From TCMID database	7054|TH(15.365)	7166|TPH1(15.365)	5053|PAH(15.365)	4846|NOS3(15.365)	4759|NEU2(15.365)	2104|ESRRG(8.253)	1345|COX6C(8.253)	1329|COX5B(8.253)	1350|COX7C(8.253)	4512|COX1(8.253)	1646|AKR1C2(8.253)	125|ADH1B(8.253)	9377|COX5A(8.253)	4514|COX3(8.253)	1346|COX7A1(8.253)	2235|FECH(8.253)	1327|COX4I1(8.253)	5319|PLA2G1B(8.253)	1645|AKR1C1(8.253)	1339|COX6A2(8.253)	3156|HMGCR(8.253)	126|ADH1C(8.253)	1340|COX6B1(8.253)	2172|FABP6(8.253)	1066|CES1(8.253)	1349|COX7B(8.253)	4513|COX2(8.253)	1351|COX8A(8.253)	9971|NR1H4(8.253)	2936|GSR(5.785)	8510|MMP23B(5.785)	4259|MGST3(5.785)	2879|GPX4(5.785)	819|CAMLG(5.785)	2946|GSTM2(5.785)	4327|MMP19(5.785)	4323|MMP14(5.785)	2678|GGT1(5.785)	4321|MMP12(5.785)	4312|MMP1(5.785)	4258|MGST2(5.785)	2937|GSS(5.785)	118856|MMP21(5.785)	221357|GSTA5(5.785)	2949|GSTM5(5.785)	2739|GLO1(5.785)	2954|GSTZ1(5.785)	4316|MMP7(5.785)
Daucosterol	ID:4679 From TCMID database	2548|GAA(8.253)	8972|MGAM(8.253)	135|ADORA2A(8.253)	5422|POLA1(8.253)	280|AMY2B(8.253)	136|ADORA2B(8.253)	2908|NR3C1(8.253)	279|AMY2A(8.253)	476|ATP1A1(8.253)	140|ADORA3(8.253)	6476|SI(8.253)	5423|POLB(8.253)	1786|DNMT1(8.253)	134|ADORA1(8.253)	7852|CXCR4(5.785)	55244|SLC47A1(5.785)	2100|ESR2(5.785)	1576|CYP3A4(5.785)	2099|ESR1(5.785)	8001|GLRA3(5.785)	4791|NFKB2(5.785)	7124|TNF(5.785)	3284|HSD3B2(5.785)	5740|PTGIS(5.785)	4318|MMP9(5.785)	1595|CYP51A1(5.785)	5241|PGR(5.785)	367|AR(5.785)	64805|P2RY12(5.785)	5739|PTGIR(5.785)	3458|IFNG(5.785)	3283|HSD3B1(5.785)	3156|HMGCR(5.785)	3757|KCNH2(5.785)	3689|ITGB2(5.785)	1719|DHFR(5.785)	6608|SMO(5.785)	2562|GABRB3(5.785)	2862|MLNR(5.785)	28234|SLCO1B3(5.785)	4036|LRP2(5.785)	301|ANXA1(5.785)	3683|ITGAL(5.785)	213|ALB(5.785)	3066|HDAC2(5.785)	7421|VDR(5.785)	5243|ABCB1(5.785)	10599|SLCO1B1(5.785)
[truncated: 206 more columns]

## Sheet: bighead atractylodes rhizome
Phellatin	ID:17043 From TCMID database	6286|S100P(5.785)	3778|KCNMA1(5.785)	7153|TOP2A(3.351)	1105|CHD1(3.351)	266629|SEC14L3(2.608)	6257|RXRB(2.608)	4790|NFKB1(2.608)	3859|KRT12(2.608)	154|ADRB2(2.608)	6646|SOAT1(2.608)	4547|MTTP(2.608)	1128|CHRM1(2.608)	4985|OPRD1(2.608)	7099|TLR4(2.608)	10800|CYSLTR1(2.608)	203068|TUBB(2.608)	2099|ESR1(2.608)	1269|CNR2(2.608)	5916|RARG(2.608)	7124|TNF(2.608)	5515|PPP2CA(2.608)	153|ADRB1(2.608)	6037|RNASE3(2.608)	5915|RARB(2.608)	64805|P2RY12(2.608)	5739|PTGIR(2.608)	6258|RXRG(2.608)	4986|OPRK1(2.608)	6524|SLC5A2(2.608)	4583|MUC2(2.608)	3567|IL5(2.608)	5578|PRKCA(2.608)	4988|OPRM1(2.608)	8856|NR1I2(2.608)	1268|CNR1(2.608)	1636|ACE(2.608)	5467|PPARD(2.608)	1385|CREB1(2.608)	5004|ORM1(2.608)	240|ALOX5(2.608)	5516|PPP2CB(2.608)	23541|SEC14L2(2.608)	4311|MME(2.608)	1606|DGKA(2.608)	5579|PRKCB(2.608)	8435|SOAT2(2.608)	5914|RARA(2.608)	7277|TUBA4A(2.608)
N-Undecyl Acetate	ID:22208 From TCMID database	4881|NPR1(80.882)	367|AR(48.000)	4883|NPR3(22.373)	4882|NPR2(22.373)	6336|SCN10A(8.253)	43|ACHE(8.253)	590|BCHE(8.253)	2979|GUCA1B(5.859)	6863|TAC1(5.859)	3827|KNG1(5.859)	2788|GNG7(5.859)	552|AVPR1A(5.859)	135|ADORA2A(5.859)	1906|EDN1(5.859)	5020|OXT(5.859)	2986|GUCY2F(5.859)	2983|GUCY1B3(5.859)	4987|OPRL1(5.859)	7021|TFAP2B(5.859)	183|AGT(5.859)	4880|NPPC(5.859)	2984|GUCY2C(5.859)	2977|GUCY1A2(5.859)	1813|DRD2(5.859)	3037|HAS2(5.859)	51763|INPP5K(5.859)	685|BTC(5.859)	186|AGTR2(5.859)	3000|GUCY2D(5.859)	5733|PTGER3(5.859)	1814|DRD3(5.859)	8692|HYAL2(5.859)	4878|NPPA(5.859)	79849|PDZD3(5.859)	2982|GUCY1A3(5.859)	4879|NPPB(5.859)	11280|SCN11A(5.785)	6327|SCN2B(5.785)	781|CACNA2D1(5.785)	18|ABAT(5.785)	6323|SCN1A(5.785)	2104|ESRRG(5.785)	55800|SCN3B(5.785)	1345|COX6C(5.785)	1329|COX5B(5.785)	1350|COX7C(5.785)	4512|COX1(5.785)	1131|CHRM3(5.785)
1-Nonen-3-Ol	ID:15687 From TCMID database	7421|VDR(80.882)	1594|CYP27B1(80.882)	2638|GC(55.444)	22938|SNW1(55.444)	4790|NFKB1(22.373)	8644|AKR1C3(22.373)	1591|CYP24A1(22.373)	151306|GPBAR1(22.373)	6591|SNAI2(22.373)	5469|MED1(22.373)	6615|SNAI1(22.373)	1576|CYP3A4(22.373)	793|CALB1(22.373)	2099|ESR1(22.373)	8074|FGF23(22.373)	2672|GFI1(22.373)	5241|PGR(22.373)	55915|LANCL2(22.373)	54361|WNT4(22.373)	6929|TCF3(22.373)	581|BAX(22.373)	9365|KL(22.373)	120227|CYP2R1(22.373)	5371|PML(22.373)	2683|B4GALT1(22.373)	795|S100G(22.373)	1593|CYP27A1(22.373)	25959|KANK2(22.373)	10265|IRX5(22.373)	6256|RXRA(22.373)	9971|NR1H4(22.373)	8805|TRIM24(22.373)	1586|CYP17A1(15.365)	162514|TRPV3(15.365)	4986|OPRK1(15.365)	79054|TRPM8(15.365)	8989|TRPA1(15.365)	7054|TH(8.253)	5731|PTGER1(8.253)	7166|TPH1(8.253)	367|AR(8.253)	2908|NR3C1(8.253)	5053|PAH(8.253)	5733|PTGER3(8.253)	476|ATP1A1(8.253)	5737|PTGFR(8.253)	4846|NOS3(8.253)	51293|CD320(5.859)
N-Methylephedrine	ID:14388 From TCMID database	6531|SLC6A3(686.000)	468|ATF4(686.000)	148|ADRA1A(686.000)	154|ADRB2(686.000)	122953|JDP2(686.000)	3558|IL2(686.000)	150|ADRA2A(686.000)	467|ATF3(686.000)	7124|TNF(686.000)	1386|ATF2(686.000)	466|ATF1(686.000)	153|ADRB1(686.000)	4772|NFATC1(686.000)	22809|ATF5(686.000)	3725|JUN(686.000)	6532|SLC6A4(686.000)	43|ACHE(686.000)	6571|SLC18A2(686.000)	11016|ATF7(686.000)	22926|ATF6(686.000)	2353|FOS(686.000)	6530|SLC6A2(686.000)	1812|DRD1(122.778)	5594|MAPK1(48.000)	23428|SLC7A8(48.000)	7054|TH(48.000)	8503|PIK3R3(48.000)	4129|MAOB(48.000)	5295|PIK3R1(48.000)	6570|SLC18A1(48.000)	6898|TAT(48.000)	3358|HTR2C(48.000)	146|ADRA1D(48.000)	10667|FARS2(48.000)	1813|DRD2(48.000)	5053|PAH(48.000)	2193|FARSA(48.000)	4128|MAOA(48.000)	2904|GRIN2B(48.000)	147|ADRA1B(48.000)	152|ADRA2C(48.000)	10056|FARSB(48.000)	5296|PIK3R2(48.000)	155|ADRB3(48.000)	134864|TAAR1(48.000)	9607|CARTPT(48.000)	151|ADRA2B(48.000)	2902|GRIN1(48.000)
1-Tetradecanol	ID:21025 From TCMID database	162514|TRPV3(122.778)	4986|OPRK1(122.778)	79054|TRPM8(122.778)	8989|TRPA1(122.778)	782|CACNB1(80.882)	2893|GRIA4(80.882)	2555|GABRA2(80.882)	10369|CACNG2(80.882)	2563|GABRD(80.882)	1137|CHRNA4(80.882)	1142|CHRNB3(80.882)	2560|GABRB1(80.882)	2890|GRIA1(80.882)	2742|GLRA2(80.882)	3760|KCNJ3(80.882)	2567|GABRG3(80.882)	7412|VCAM1(80.882)	1139|CHRNA7(80.882)	3763|KCNJ6(80.882)	2564|GABRE(80.882)	2556|GABRA3(80.882)	2030|SLC29A1(80.882)	779|CACNA1S(80.882)	2565|GABRG1(80.882)	2568|GABRP(80.882)	57053|CHRNA10(80.882)	2891|GRIA2(80.882)	2557|GABRA4(80.882)	1136|CHRNA3(80.882)	2561|GABRB2(80.882)	775|CACNA1C(80.882)	1141|CHRNB2(80.882)	776|CACNA1D(80.882)	200909|HTR3D(80.882)	55879|GABRQ(80.882)	1135|CHRNA2(80.882)	8973|CHRNA6(80.882)	2562|GABRB3(80.882)	3762|KCNJ5(80.882)	116443|GRIN3A(80.882)	9177|HTR3B(80.882)	2892|GRIA3(80.882)	2558|GABRA5(80.882)	3177|SLC29A2(80.882)	285242|HTR3E(80.882)	2559|GABRA6(80.882)	3359|HTR3A(80.882)	2554|GABRA1(80.882)
1-Heptadecanol	ID:9378 From TCMID database	162514|TRPV3(122.778)	4986|OPRK1(122.778)	79054|TRPM8(122.778)	8989|TRPA1(122.778)	782|CACNB1(80.882)	2893|GRIA4(80.882)	2555|GABRA2(80.882)	10369|CACNG2(80.882)	2563|GABRD(80.882)	1137|CHRNA4(80.882)	1142|CHRNB3(80.882)	2560|GABRB1(80.882)	2890|GRIA1(80.882)	2742|GLRA2(80.882)	3760|KCNJ3(80.882)	2567|GABRG3(80.882)	7412|VCAM1(80.882)	1139|CHRNA7(80.882)	3763|KCNJ6(80.882)	2564|GABRE(80.882)	2556|GABRA3(80.882)	2030|SLC29A1(80.882)	779|CACNA1S(80.882)	2565|GABRG1(80.882)	2568|GABRP(80.882)	57053|CHRNA10(80.882)	2891|GRIA2(80.882)	2557|GABRA4(80.882)	1136|CHRNA3(80.882)	2561|GABRB2(80.882)	775|CACNA1C(80.882)	1141|CHRNB2(80.882)	776|CACNA1D(80.882)	200909|HTR3D(80.882)	55879|GABRQ(80.882)	1135|CHRNA2(80.882)	8973|CHRNA6(80.882)	2562|GABRB3(80.882)	3762|KCNJ5(80.882)	116443|GRIN3A(80.882)	9177|HTR3B(80.882)	2892|GRIA3(80.882)	2558|GABRA5(80.882)	3177|SLC29A2(80.882)	285242|HTR3E(80.882)	2559|GABRA6(80.882)	3359|HTR3A(80.882)	2554|GABRA1(80.882)
Octanol	ID:15967 From TCMID database	162514|TRPV3(122.778)	4986|OPRK1(122.778)	79054|TRPM8(122.778)	8989|TRPA1(122.778)	50801|KCNK4(55.444)	11280|SCN11A(48.000)	6327|SCN2B(48.000)	18|ABAT(48.000)	6323|SCN1A(48.000)	55800|SCN3B(48.000)	6328|SCN3A(48.000)	6332|SCN7A(48.000)	6331|SCN5A(48.000)	6336|SCN10A(48.000)	6718|AKR1D1(48.000)	7915|ALDH5A1(48.000)	6326|SCN2A(48.000)	9734|HDAC9(48.000)	7299|TYR(48.000)	6335|SCN9A(48.000)	6329|SCN4A(48.000)	6330|SCN4B(48.000)	6716|SRD5A2(48.000)	36|ACADSB(48.000)	6334|SCN8A(48.000)	6324|SCN1B(48.000)	4967|OGDH(48.000)	3066|HDAC2(48.000)	89|ACTN3(22.373)	6863|TAC1(22.373)	4804|NGFR(22.373)	150|ADRA2A(22.373)	7442|TRPV1(22.373)	2255|FGF10(22.373)	7415|VCP(22.373)	3091|HIF1A(22.373)	664|BNIP3(22.373)	1392|CRH(22.373)	4747|NEFL(22.373)	90226|UCN2(22.373)	6608|SMO(22.373)	6865|TACR2(22.373)	358|AQP1(22.373)	255061|TAC4(22.373)	1001|CDH3(22.373)	863|CBFA2T3(22.373)	4744|NEFH(22.373)	1395|CRHR2(22.373)
Beta-Elemene	ID:23279 From TCMID database	3750|KCND1(80.882)	3738|KCNA3(80.882)	5564|PRKAB1(80.882)	124|ADH1A(80.882)	3744|KCNA10(80.882)	2593|GAMT(80.882)	3748|KCNC3(80.882)	3736|KCNA1(80.882)	3737|KCNA2(80.882)	7173|TPO(80.882)	847|CAT(80.882)	3745|KCNB1(80.882)	125|ADH1B(80.882)	1742|DLG4(80.882)	3747|KCNC2(80.882)	3746|KCNC1(80.882)	126|ADH1C(80.882)	9312|KCNB2(80.882)	3741|KCNA5(80.882)	6035|RNASE1(80.882)	3751|KCND2(80.882)	217|ALDH2(80.882)	3739|KCNA4(80.882)	3743|KCNA7(80.882)	3742|KCNA6(80.882)	3752|KCND3(80.882)	2983|GUCY1B3(55.444)	2628|GATM(55.444)	50801|KCNK4(55.444)	389434|IYD(55.444)	3784|KCNQ1(55.444)	2203|FBP1(22.373)	9162|DGKI(22.373)	131|ADH7(22.373)	4781|NFIB(22.373)	114757|CYGB(22.373)	9369|NRXN3(22.373)	94030|LRRC4B(22.373)	343|AQP8(22.373)	170302|ARX(22.373)	3479|IGF1(22.373)	85358|SHANK3(22.373)	91703|ACY3(22.373)	443|ASPA(22.373)	9378|NRXN1(22.373)	1906|EDN1(22.373)	5020|OXT(22.373)	9863|MAGI2(22.373)
1,2,3,4,6-Pentagalloylglucose	ID:16823 From TCMID database	5742|PTGS1(8.253)	5743|PTGS2(8.253)	7153|TOP2A(5.785)	55244|SLC47A1(5.785)	1576|CYP3A4(5.785)	1105|CHD1(5.785)	1595|CYP51A1(5.785)	3757|KCNH2(5.785)	476|ATP1A1(5.785)	23569|PADI4(5.785)	2862|MLNR(5.785)	28234|SLCO1B3(5.785)	213|ALB(5.785)	5243|ABCB1(5.785)	7155|TOP2B(5.785)	10599|SLCO1B1(5.785)	1644|DDC(3.351)	240|ALOX5(3.351)	6531|SLC6A3(2.608)	11280|SCN11A(2.608)	6257|RXRB(2.608)	781|CACNA2D1(2.608)	2280|FKBP1A(2.608)	148|ADRA1A(2.608)	6323|SCN1A(2.608)	7852|CXCR4(2.608)	2555|GABRA2(2.608)	25824|PRDX5(2.608)	2548|GAA(2.608)	8972|MGAM(2.608)	2563|GABRD(2.608)	1589|CYP21A2(2.608)	154|ADRB2(2.608)	6646|SOAT1(2.608)	2560|GABRB1(2.608)	1131|CHRM3(2.608)	2246|FGF1(2.608)	2567|GABRG3(2.608)	4547|MTTP(2.608)	1128|CHRM1(2.608)	4985|OPRD1(2.608)	150|ADRA2A(2.608)	3351|HTR1B(2.608)	203068|TUBB(2.608)	8001|GLRA3(2.608)	5916|RARG(2.608)	4791|NFKB2(2.608)	4133|MAP2(2.608)
Exaltolide	ID:7671 From TCMID database	367|AR(122.778)	1131|CHRM3(15.365)	1128|CHRM1(15.365)	2194|FASN(15.365)	5406|PNLIP(15.365)	1129|CHRM2(15.365)	8513|LIPF(15.365)	8911|CACNA1I(8.253)	8913|CACNA1G(8.253)	27349|MCAT(5.859)	1737|DLAT(5.859)	55301|OLAH(5.859)	54995|OXSM(5.859)	11280|SCN11A(5.785)	6327|SCN2B(5.785)	781|CACNA2D1(5.785)	5327|PLAT(5.785)	18|ABAT(5.785)	6323|SCN1A(5.785)	2104|ESRRG(5.785)	55800|SCN3B(5.785)	1345|COX6C(5.785)	1329|COX5B(5.785)	6542|SLC7A2(5.785)	55244|SLC47A1(5.785)	1350|COX7C(5.785)	4512|COX1(5.785)	2161|F12(5.785)	6328|SCN3A(5.785)	773|CACNA1A(5.785)	1576|CYP3A4(5.785)	1646|AKR1C2(5.785)	6332|SCN7A(5.785)	2099|ESR1(5.785)	116444|GRIN3B(5.785)	9254|CACNA2D2(5.785)	2903|GRIN2A(5.785)	6331|SCN5A(5.785)	6336|SCN10A(5.785)	6718|AKR1D1(5.785)	7915|ALDH5A1(5.785)	7150|TOP1(5.785)	6326|SCN2A(5.785)	1595|CYP51A1(5.785)	9377|COX5A(5.785)	5734|PTGER4(5.785)	5241|PGR(5.785)	4514|COX3(5.785)
3-O-Tetradecanoyl-1-Cyano-2-Methyl-1,2-Propene	ID:32010 From TCMID database	1128|CHRM1(5.785)	2099|ESR1(5.785)	5734|PTGER4(5.785)	5241|PGR(5.785)	367|AR(5.785)	2908|NR3C1(5.785)	5578|PRKCA(5.785)	5732|PTGER2(5.785)	5733|PTGER3(5.785)	1181|CLCN2(5.785)	1588|CYP19A1(5.785)	1129|CHRM2(5.785)	5580|PRKCD(5.785)	4306|NR3C2(5.785)	2555|GABRA2(3.351)	2563|GABRD(3.351)	2560|GABRB1(3.351)	2567|GABRG3(3.351)	2564|GABRE(3.351)	2556|GABRA3(3.351)	2565|GABRG1(3.351)	2568|GABRP(3.351)	2557|GABRA4(3.351)	2561|GABRB2(3.351)	55879|GABRQ(3.351)	2562|GABRB3(3.351)	2558|GABRA5(3.351)	2559|GABRA6(3.351)	2554|GABRA1(3.351)	2566|GABRG2(3.351)	151|ADRA2B(3.351)	6531|SLC6A3(2.608)	11280|SCN11A(2.608)	6327|SCN2B(2.608)	782|CACNB1(2.608)	781|CACNA2D1(2.608)	5327|PLAT(2.608)	8912|CACNA1H(2.608)	18|ABAT(2.608)	6323|SCN1A(2.608)	5141|PDE4A(2.608)	2104|ESRRG(2.608)	55800|SCN3B(2.608)	1345|COX6C(2.608)	1329|COX5B(2.608)	778|CACNA1F(2.608)	6542|SLC7A2(2.608)	6546|SLC8A1(2.608)
Alpha-Phellandrene	ID:24956 From TCMID database	3750|KCND1(80.882)	3738|KCNA3(80.882)	5564|PRKAB1(80.882)	124|ADH1A(80.882)	3744|KCNA10(80.882)	2593|GAMT(80.882)	3748|KCNC3(80.882)	3736|KCNA1(80.882)	3737|KCNA2(80.882)	7173|TPO(80.882)	847|CAT(80.882)	3745|KCNB1(80.882)	125|ADH1B(80.882)	1742|DLG4(80.882)	3747|KCNC2(80.882)	3746|KCNC1(80.882)	126|ADH1C(80.882)	9312|KCNB2(80.882)	3741|KCNA5(80.882)	6035|RNASE1(80.882)	3751|KCND2(80.882)	217|ALDH2(80.882)	3739|KCNA4(80.882)	3743|KCNA7(80.882)	3742|KCNA6(80.882)	3752|KCND3(80.882)	2983|GUCY1B3(55.444)	2628|GATM(55.444)	50801|KCNK4(55.444)	389434|IYD(55.444)	3784|KCNQ1(55.444)	2203|FBP1(22.373)	9162|DGKI(22.373)	131|ADH7(22.373)	4781|NFIB(22.373)	114757|CYGB(22.373)	9369|NRXN3(22.373)	94030|LRRC4B(22.373)	343|AQP8(22.373)	170302|ARX(22.373)	3479|IGF1(22.373)	85358|SHANK3(22.373)	91703|ACY3(22.373)	443|ASPA(22.373)	9378|NRXN1(22.373)	1906|EDN1(22.373)	5020|OXT(22.373)	9863|MAGI2(22.373)
Exoticin	ID:7695 From TCMID database	4790|NFKB1(15.365)	10800|CYSLTR1(15.365)	203068|TUBB(15.365)	7124|TNF(15.365)	6037|RNASE3(15.365)	4583|MUC2(15.365)	3567|IL5(15.365)	81027|TUBB1(15.365)	10381|TUBB3(8.253)	148|ADRA1A(8.253)	150|ADRA2A(8.253)	81033|KCNH6(8.253)	10382|TUBB4A(8.253)	84617|TUBB6(8.253)	347688|TUBB8(8.253)	146|ADRA1D(8.253)	347733|TUBB2B(8.253)	3757|KCNH2(8.253)	10383|TUBB4B(8.253)	147|ADRA1B(8.253)	7280|TUBB2A(8.253)	90134|KCNH7(8.253)	151|ADRA2B(8.253)	6286|S100P(5.785)	3778|KCNMA1(5.785)	6646|SOAT1(3.351)	4543|MTNR1A(3.351)	4547|MTTP(3.351)	1269|CNR2(3.351)	4544|MTNR1B(3.351)	2677|GGCX(3.351)	5021|OXTR(3.351)	1268|CNR1(3.351)	5742|PTGS1(3.351)	5743|PTGS2(3.351)	8435|SOAT2(3.351)	6036|RNASE2(3.351)	1128|CHRM1(2.608)	1129|CHRM2(2.608)	|(2.394)	57573|ZNF471(2.394)	8563|THOC5(2.394)	8434|RECK(2.394)	10309|CCNO(2.394)	7652|ZNF99(2.394)	80176|SPSB1(2.394)	386678|KRTAP10-11(2.394)	1387|CREBBP(2.394)
1-Tetradecene	ID:21027 From TCMID database	3750|KCND1(80.882)	3738|KCNA3(80.882)	5564|PRKAB1(80.882)	124|ADH1A(80.882)	3744|KCNA10(80.882)	2593|GAMT(80.882)	3748|KCNC3(80.882)	3736|KCNA1(80.882)	3737|KCNA2(80.882)	7173|TPO(80.882)	847|CAT(80.882)	3745|KCNB1(80.882)	125|ADH1B(80.882)	1742|DLG4(80.882)	3747|KCNC2(80.882)	3746|KCNC1(80.882)	126|ADH1C(80.882)	9312|KCNB2(80.882)	3741|KCNA5(80.882)	6035|RNASE1(80.882)	3751|KCND2(80.882)	217|ALDH2(80.882)	3739|KCNA4(80.882)	3743|KCNA7(80.882)	3742|KCNA6(80.882)	3752|KCND3(80.882)	2983|GUCY1B3(55.444)	2628|GATM(55.444)	50801|KCNK4(55.444)	389434|IYD(55.444)	3784|KCNQ1(55.444)	2203|FBP1(22.373)	9162|DGKI(22.373)	131|ADH7(22.373)	4781|NFIB(22.373)	114757|CYGB(22.373)	9369|NRXN3(22.373)	94030|LRRC4B(22.373)	343|AQP8(22.373)	170302|ARX(22.373)	3479|IGF1(22.373)	85358|SHANK3(22.373)	91703|ACY3(22.373)	443|ASPA(22.373)	9378|NRXN1(22.373)	1906|EDN1(22.373)	5020|OXT(22.373)	9863|MAGI2(22.373)
Ethylleptol B	ID:7455 From TCMID database	148|ADRA1A(23.000)	146|ADRA1D(23.000)	3757|KCNH2(23.000)	147|ADRA1B(23.000)	81033|KCNH6(15.365)	90134|KCNH7(15.365)	5141|PDE4A(8.253)	5139|PDE3A(8.253)	150|ADRA2A(8.253)	495|ATP4A(8.253)	1269|CNR2(8.253)	775|CACNA1C(8.253)	1268|CNR1(8.253)	1787|TRDMT1(8.253)	200895|DHFRL1(8.253)	1719|DHFR(8.253)	5742|PTGS1(8.253)	10846|PDE10A(8.253)	5743|PTGS2(8.253)	5138|PDE2A(8.253)	6256|RXRA(8.253)	151|ADRA2B(8.253)	7298|TYMS(8.253)	89797|NAV2(5.859)	154|ADRB2(5.859)	5261|PHKG2(5.859)	7531|YWHAE(5.859)	1139|CHRNA7(5.859)	153|ADRB1(5.859)	5144|PDE4D(5.859)	3630|INS(5.859)	4878|NPPA(5.859)	1816|DRD5(5.859)	9992|KCNE2(5.859)	796|CALCA(5.859)	3784|KCNQ1(5.859)	7168|TPM1(5.859)	1907|EDN2(5.859)	3753|KCNE1(5.859)	4790|NFKB1(3.351)	811|CALR(3.351)	7153|TOP2A(3.351)	3356|HTR2A(3.351)	1131|CHRM3(3.351)	4835|NQO2(3.351)	4543|MTNR1A(3.351)	1128|CHRM1(3.351)	3357|HTR2B(3.351)
1,4,7-Tridecatriene	ID:21600 From TCMID database	3750|KCND1(80.882)	3738|KCNA3(80.882)	5564|PRKAB1(80.882)	124|ADH1A(80.882)	3744|KCNA10(80.882)	2593|GAMT(80.882)	3748|KCNC3(80.882)	3736|KCNA1(80.882)	3737|KCNA2(80.882)	7173|TPO(80.882)	847|CAT(80.882)	3745|KCNB1(80.882)	125|ADH1B(80.882)	1742|DLG4(80.882)	3747|KCNC2(80.882)	3746|KCNC1(80.882)	126|ADH1C(80.882)	9312|KCNB2(80.882)	3741|KCNA5(80.882)	6035|RNASE1(80.882)	3751|KCND2(80.882)	217|ALDH2(80.882)	3739|KCNA4(80.882)	3743|KCNA7(80.882)	3742|KCNA6(80.882)	3752|KCND3(80.882)	2983|GUCY1B3(55.444)	2628|GATM(55.444)	50801|KCNK4(55.444)	389434|IYD(55.444)	3784|KCNQ1(55.444)	2203|FBP1(22.373)	9162|DGKI(22.373)	131|ADH7(22.373)	4781|NFIB(22.373)	114757|CYGB(22.373)	9369|NRXN3(22.373)	94030|LRRC4B(22.373)	343|AQP8(22.373)	170302|ARX(22.373)	3479|IGF1(22.373)	85358|SHANK3(22.373)	91703|ACY3(22.373)	443|ASPA(22.373)	9378|NRXN1(22.373)	1906|EDN1(22.373)	5020|OXT(22.373)	9863|MAGI2(22.373)
Scopolin	ID:19530 From TCMID database	7153|TOP2A(23.000)	203068|TUBB(23.000)	10382|TUBB4A(23.000)	347733|TUBB2B(23.000)	10383|TUBB4B(23.000)	7278|TUBA3C(23.000)	84790|TUBA1C(23.000)	7280|TUBB2A(23.000)	10376|TUBA1B(23.000)	7277|TUBA4A(23.000)	7155|TOP2B(23.000)	113457|TUBA3D(23.000)	7846|TUBA1A(23.000)	10381|TUBB3(15.365)	1962|EHHADH(15.365)	51807|TUBA8(15.365)	112714|TUBA3E(15.365)	84617|TUBB6(15.365)	347688|TUBB8(15.365)	8284|KDM5D(8.253)	221120|ALKBH3(8.253)	79676|OGFOD2(8.253)	10536|P3H3(8.253)	55217|TMLHE(8.253)	54681|P4HTM(8.253)	5351|PLOD1(8.253)	112398|EGLN2(8.253)	121642|ALKBH2(8.253)	8424|BBOX1(8.253)	5066|PAM(8.253)	9963|SLC23A1(8.253)	55239|OGFOD1(8.253)	1621|DBH(8.253)	112399|EGLN3(8.253)	476|ATP1A1(8.253)	8985|PLOD3(8.253)	5033|P4HA1(8.253)	54583|EGLN1(8.253)	55214|P3H2(8.253)	3938|LCT(8.253)	79861|TUBAL3(8.253)	81027|TUBB1(8.253)	5352|PLOD2(8.253)	64175|P3H1(8.253)	5264|PHYH(8.253)	22985|ACIN1(5.859)	7150|TOP1(5.859)	1677|DFFB(5.859)
1-Monolinolein	ID:14917 From TCMID database	6546|SLC8A1(48.000)	7442|TRPV1(48.000)	367|AR(48.000)	2908|NR3C1(48.000)	9415|FADS2(48.000)	3992|FADS1(48.000)	5742|PTGS1(48.000)	5743|PTGS2(48.000)	6785|ELOVL4(48.000)	1588|CYP19A1(48.000)	5578|PRKCA(15.365)	5580|PRKCD(15.365)	8284|KDM5D(8.253)	221120|ALKBH3(8.253)	79676|OGFOD2(8.253)	10536|P3H3(8.253)	55217|TMLHE(8.253)	54681|P4HTM(8.253)	5351|PLOD1(8.253)	112398|EGLN2(8.253)	121642|ALKBH2(8.253)	8424|BBOX1(8.253)	3156|HMGCR(8.253)	5066|PAM(8.253)	9963|SLC23A1(8.253)	55239|OGFOD1(8.253)	1621|DBH(8.253)	112399|EGLN3(8.253)	476|ATP1A1(8.253)	8985|PLOD3(8.253)	5033|P4HA1(8.253)	5737|PTGFR(8.253)	54583|EGLN1(8.253)	55214|P3H2(8.253)	3938|LCT(8.253)	5352|PLOD2(8.253)	64175|P3H1(8.253)	5264|PHYH(8.253)	782|CACNB1(5.785)	781|CACNA2D1(5.785)	5327|PLAT(5.785)	6715|SRD5A1(5.785)	8912|CACNA1H(5.785)	5141|PDE4A(5.785)	778|CACNA1F(5.785)	55244|SLC47A1(5.785)	2161|F12(5.785)	773|CACNA1A(5.785)
Elemene	ID:23295 From TCMID database	3750|KCND1(80.882)	3738|KCNA3(80.882)	5564|PRKAB1(80.882)	124|ADH1A(80.882)	3744|KCNA10(80.882)	2593|GAMT(80.882)	3748|KCNC3(80.882)	3736|KCNA1(80.882)	3737|KCNA2(80.882)	7173|TPO(80.882)	847|CAT(80.882)	3745|KCNB1(80.882)	125|ADH1B(80.882)	1742|DLG4(80.882)	3747|KCNC2(80.882)	3746|KCNC1(80.882)	126|ADH1C(80.882)	9312|KCNB2(80.882)	3741|KCNA5(80.882)	6035|RNASE1(80.882)	3751|KCND2(80.882)	217|ALDH2(80.882)	3739|KCNA4(80.882)	3743|KCNA7(80.882)	3742|KCNA6(80.882)	3752|KCND3(80.882)	2983|GUCY1B3(55.444)	2628|GATM(55.444)	50801|KCNK4(55.444)	389434|IYD(55.444)	3784|KCNQ1(55.444)	2203|FBP1(22.373)	9162|DGKI(22.373)	131|ADH7(22.373)	4781|NFIB(22.373)	114757|CYGB(22.373)	9369|NRXN3(22.373)	94030|LRRC4B(22.373)	343|AQP8(22.373)	170302|ARX(22.373)	3479|IGF1(22.373)	85358|SHANK3(22.373)	91703|ACY3(22.373)	443|ASPA(22.373)	9378|NRXN1(22.373)	1906|EDN1(22.373)	5020|OXT(22.373)	9863|MAGI2(22.373)
Marmesinin	ID:13565 From TCMID database	135|ADORA2A(8.253)	136|ADORA2B(8.253)	140|ADORA3(8.253)	134|ADORA1(8.253)	4985|OPRD1(5.785)	79001|VKORC1(5.785)	4986|OPRK1(5.785)	4988|OPRM1(5.785)	1244|ABCC2(3.351)	2203|FBP1(3.351)	207|AKT1(3.351)	5564|PRKAB1(3.351)	10381|TUBB3(3.351)	90|ACVR1(3.351)	439|ASNA1(3.351)	157|ADRBK2(3.351)	55902|ACSS2(3.351)	7153|TOP2A(3.351)	1962|EHHADH(3.351)	94|ACVRL1(3.351)	107|ADCY1(3.351)	22978|NT5C2(3.351)	269|AMHR2(3.351)	10188|TNK2(3.351)	51807|TUBA8(3.351)	203068|TUBB(3.351)	440|ASNS(3.351)	132|ADK(3.351)	27|ABL2(3.351)	10382|TUBB4A(3.351)	112714|TUBA3E(3.351)	156|ADRBK1(3.351)	84617|TUBB6(3.351)	5144|PDE4D(3.351)	347688|TUBB8(3.351)	4023|LPL(3.351)	347733|TUBB2B(3.351)	6524|SLC5A2(3.351)	5562|PRKAA1(3.351)	10383|TUBB4B(3.351)	10060|ABCC9(3.351)	1385|CREB1(3.351)	84532|ACSS1(3.351)	7278|TUBA3C(3.351)	5292|PIM1(3.351)	5836|PYGL(3.351)	25|ABL1(3.351)	10939|AFG3L2(3.351)
Camphene	ID:3045 From TCMID database	3750|KCND1(80.882)	3738|KCNA3(80.882)	5564|PRKAB1(80.882)	124|ADH1A(80.882)	3744|KCNA10(80.882)	2593|GAMT(80.882)	3748|KCNC3(80.882)	3736|KCNA1(80.882)	3737|KCNA2(80.882)	7173|TPO(80.882)	847|CAT(80.882)	3745|KCNB1(80.882)	125|ADH1B(80.882)	1742|DLG4(80.882)	3747|KCNC2(80.882)	3746|KCNC1(80.882)	126|ADH1C(80.882)	9312|KCNB2(80.882)	3741|KCNA5(80.882)	6035|RNASE1(80.882)	3751|KCND2(80.882)	217|ALDH2(80.882)	3739|KCNA4(80.882)	3743|KCNA7(80.882)	3742|KCNA6(80.882)	3752|KCND3(80.882)	2983|GUCY1B3(55.444)	2628|GATM(55.444)	50801|KCNK4(55.444)	389434|IYD(55.444)	3784|KCNQ1(55.444)	2203|FBP1(22.373)	9162|DGKI(22.373)	131|ADH7(22.373)	4781|NFIB(22.373)	114757|CYGB(22.373)	9369|NRXN3(22.373)	94030|LRRC4B(22.373)	343|AQP8(22.373)	170302|ARX(22.373)	3479|IGF1(22.373)	85358|SHANK3(22.373)	91703|ACY3(22.373)	443|ASPA(22.373)	9378|NRXN1(22.373)	1906|EDN1(22.373)	5020|OXT(22.373)	9863|MAGI2(22.373)
20-Hexadecanoylingenol	ID:9488 From TCMID database	5578|PRKCA(122.778)	5580|PRKCD(122.778)	5734|PTGER4(23.000)	5732|PTGER2(23.000)	5733|PTGER3(23.000)	11314|CD300A(22.373)	1113|CHGA(22.373)	344|APOC2(22.373)	9928|KIF14(22.373)	5579|PRKCB(22.373)	2908|NR3C1(15.365)	5327|PLAT(8.253)	27115|PDE7B(8.253)	5141|PDE4A(8.253)	135|ADORA2A(8.253)	5731|PTGER1(8.253)	5144|PDE4D(8.253)	5739|PTGIR(8.253)	5150|PDE7A(8.253)	5143|PDE4C(8.253)	476|ATP1A1(8.253)	5582|PRKCG(8.253)	5142|PDE4B(8.253)	134|ADORA1(8.253)	301|ANXA1(8.253)	207|AKT1(5.859)	1535|CYBA(5.859)	23604|DAPK2(5.859)	6609|SMPD1(5.859)	23411|SIRT1(5.859)	114897|C1QTNF1(5.859)	5581|PRKCE(5.859)	51499|TRIAP1(5.859)	4869|NPM1(5.859)	7186|TRAF2(5.859)	57704|GBA2(5.859)	3728|JUP(5.859)	2717|GLA(5.859)	7040|TGFB1(5.859)	948|CD36(5.859)	9730|VPRBP(5.859)	4282|MIF(5.859)	6347|CCL2(5.859)	154|ADRB2(5.859)	2629|GBA(5.859)	83903|GSG2(5.859)	9378|NRXN1(5.859)	7357|UGCG(5.859)
P-Cymene	ID:4549 From TCMID database	2561|GABRB2(80.882)	2562|GABRB3(80.882)	2147|F2(80.882)	2850|GPR27(55.444)	948|CD36(22.373)	6385|SDC4(22.373)	961|CD47(22.373)	636|BICD1(22.373)	2560|GABRB1(15.365)	162514|TRPV3(7.564)	4986|OPRK1(7.564)	79054|TRPM8(7.564)	8989|TRPA1(7.564)	89|ACTN3(5.859)	9110|MTMR4(5.859)	9241|NOG(5.859)	114897|C1QTNF1(5.859)	5045|FURIN(5.859)	7391|USF1(5.859)	1361|CPB2(5.859)	2555|GABRA2(5.859)	5627|PROS1(5.859)	8858|PROZ(5.859)	1137|CHRNA4(5.859)	4916|NTRK3(5.859)	154|ADRB2(5.859)	2161|F12(5.859)	135|ADORA2A(5.859)	4763|NF1(5.859)	2742|GLRA2(5.859)	4152|MBD1(5.859)	2567|GABRG3(5.859)	7056|THBD(5.859)	22997|IGSF9B(5.859)	6376|CX3CL1(5.859)	239|ALOX12(5.859)	348|APOE(5.859)	5054|SERPINE1(5.859)	350|APOH(5.859)	4923|NTSR1(5.859)	8001|GLRA3(5.859)	5270|SERPINE2(5.859)	9283|GPR37L1(5.859)	3818|KLKB1(5.859)	1139|CHRNA7(5.859)	10497|UNC13B(5.859)	6331|SCN5A(5.859)	847|CAT(5.859)
Suberosin	ID:23089 From TCMID database	4790|NFKB1(15.365)	10800|CYSLTR1(15.365)	7124|TNF(15.365)	6037|RNASE3(15.365)	4583|MUC2(15.365)	3567|IL5(15.365)	148|ADRA1A(8.253)	5141|PDE4A(8.253)	5139|PDE3A(8.253)	150|ADRA2A(8.253)	81033|KCNH6(8.253)	1269|CNR2(8.253)	146|ADRA1D(8.253)	775|CACNA1C(8.253)	1268|CNR1(8.253)	3757|KCNH2(8.253)	1787|TRDMT1(8.253)	200895|DHFRL1(8.253)	1719|DHFR(8.253)	147|ADRA1B(8.253)	10846|PDE10A(8.253)	5138|PDE2A(8.253)	90134|KCNH7(8.253)	151|ADRA2B(8.253)	7298|TYMS(8.253)	1429|CRYZ(5.785)	79001|VKORC1(5.785)	6286|S100P(5.785)	1728|NQO1(5.785)	3778|KCNMA1(5.785)	811|CALR(3.351)	7153|TOP2A(3.351)	3356|HTR2A(3.351)	1131|CHRM3(3.351)	4835|NQO2(3.351)	4543|MTNR1A(3.351)	1128|CHRM1(3.351)	3357|HTR2B(3.351)	2099|ESR1(3.351)	4544|MTNR1B(3.351)	3362|HTR6(3.351)	438|ASMT(3.351)	810|CALML3(3.351)	4353|MPO(3.351)	3358|HTR2C(3.351)	1813|DRD2(3.351)	1133|CHRM5(3.351)	6532|SLC6A4(3.351)
Pabulenol	ID:16477 From TCMID database	1244|ABCC2(8.253)	2203|FBP1(8.253)	207|AKT1(8.253)	1146|CHRNG(8.253)	3775|KCNK1(8.253)	5564|PRKAB1(8.253)	90|ACVR1(8.253)	439|ASNA1(8.253)	157|ADRBK2(8.253)	55902|ACSS2(8.253)	1137|CHRNA4(8.253)	1142|CHRNB3(8.253)	94|ACVRL1(8.253)	107|ADCY1(8.253)	4985|OPRD1(8.253)	22978|NT5C2(8.253)	269|AMHR2(8.253)	10188|TNK2(8.253)	440|ASNS(8.253)	132|ADK(8.253)	27|ABL2(8.253)	1139|CHRNA7(8.253)	6331|SCN5A(8.253)	156|ADRBK1(8.253)	1134|CHRNA1(8.253)	5144|PDE4D(8.253)	57053|CHRNA10(8.253)	4986|OPRK1(8.253)	1136|CHRNA3(8.253)	1141|CHRNB2(8.253)	4988|OPRM1(8.253)	43|ACHE(8.253)	3757|KCNH2(8.253)	5562|PRKAA1(8.253)	1145|CHRNE(8.253)	10060|ABCC9(8.253)	1385|CREB1(8.253)	1135|CHRNA2(8.253)	84532|ACSS1(8.253)	5292|PIM1(8.253)	8973|CHRNA6(8.253)	5836|PYGL(8.253)	2815|GP9(8.253)	25|ABL1(8.253)	10939|AFG3L2(8.253)	3783|KCNN4(8.253)	6286|S100P(8.253)	65061|CDK15(8.253)
Phellopterin	ID:17063 From TCMID database	4790|NFKB1(15.365)	10800|CYSLTR1(15.365)	7124|TNF(15.365)	6037|RNASE3(15.365)	4583|MUC2(15.365)	3567|IL5(15.365)	148|ADRA1A(8.253)	5141|PDE4A(8.253)	5139|PDE3A(8.253)	150|ADRA2A(8.253)	81033|KCNH6(8.253)	1269|CNR2(8.253)	146|ADRA1D(8.253)	775|CACNA1C(8.253)	1268|CNR1(8.253)	3757|KCNH2(8.253)	1787|TRDMT1(8.253)	200895|DHFRL1(8.253)	1719|DHFR(8.253)	147|ADRA1B(8.253)	10846|PDE10A(8.253)	5138|PDE2A(8.253)	90134|KCNH7(8.253)	151|ADRA2B(8.253)	7298|TYMS(8.253)	811|CALR(3.351)	7153|TOP2A(3.351)	3356|HTR2A(3.351)	1131|CHRM3(3.351)	4835|NQO2(3.351)	4543|MTNR1A(3.351)	1128|CHRM1(3.351)	3357|HTR2B(3.351)	2099|ESR1(3.351)	4544|MTNR1B(3.351)	3362|HTR6(3.351)	438|ASMT(3.351)	810|CALML3(3.351)	4353|MPO(3.351)	3358|HTR2C(3.351)	1813|DRD2(3.351)	1133|CHRM5(3.351)	6532|SLC6A4(3.351)	59340|HRH4(3.351)	3269|HRH1(3.351)	3274|HRH2(3.351)	3350|HTR1A(3.351)	152|ADRA2C(3.351)
Nonyl Ethyl Ether	ID:15691 From TCMID database	7915|ALDH5A1(8.253)	6557|SLC12A1(8.253)	11280|SCN11A(5.785)	6327|SCN2B(5.785)	18|ABAT(5.785)	6323|SCN1A(5.785)	55800|SCN3B(5.785)	2555|GABRA2(5.785)	2563|GABRD(5.785)	2560|GABRB1(5.785)	6328|SCN3A(5.785)	2567|GABRG3(5.785)	1128|CHRM1(5.785)	162514|TRPV3(5.785)	6332|SCN7A(5.785)	6331|SCN5A(5.785)	6336|SCN10A(5.785)	6718|AKR1D1(5.785)	2564|GABRE(5.785)	759|CA1(5.785)	6326|SCN2A(5.785)	2556|GABRA3(5.785)	2565|GABRG1(5.785)	367|AR(5.785)	2568|GABRP(5.785)	2557|GABRA4(5.785)	9734|HDAC9(5.785)	4986|OPRK1(5.785)	2561|GABRB2(5.785)	7299|TYR(5.785)	6335|SCN9A(5.785)	6329|SCN4A(5.785)	6330|SCN4B(5.785)	55879|GABRQ(5.785)	2562|GABRB3(5.785)	2558|GABRA5(5.785)	6716|SRD5A2(5.785)	36|ACADSB(5.785)	2559|GABRA6(5.785)	6334|SCN8A(5.785)	2554|GABRA1(5.785)	6324|SCN1B(5.785)	2566|GABRG2(5.785)	760|CA2(5.785)	79054|TRPM8(5.785)	4967|OGDH(5.785)	1129|CHRM2(5.785)	3066|HDAC2(5.785)
Alloisoimperatorin	ID:934 From TCMID database	1429|CRYZ(23.000)	79001|VKORC1(23.000)	1728|NQO1(23.000)	148|ADRA1A(8.253)	2104|ESRRG(8.253)	2100|ESR2(8.253)	150|ADRA2A(8.253)	2099|ESR1(8.253)	1269|CNR2(8.253)	146|ADRA1D(8.253)	1268|CNR1(8.253)	147|ADRA1B(8.253)	152|ADRA2C(8.253)	151|ADRA2B(8.253)	9946|CRYZL1(5.859)	84869|CBR4(5.859)	127|ADH4(5.859)	154807|VKORC1L1(5.859)	9540|TP53I3(5.859)	5139|PDE3A(3.351)	10280|SIGMAR1(3.351)	4986|OPRK1(3.351)	4988|OPRM1(3.351)	6286|S100P(2.608)	3778|KCNMA1(2.608)	|(2.394)	57573|ZNF471(2.394)	8563|THOC5(2.394)	8434|RECK(2.394)	10309|CCNO(2.394)	7652|ZNF99(2.394)	80176|SPSB1(2.394)	386678|KRTAP10-11(2.394)	1387|CREBBP(2.394)	55854|ZC3H15(2.394)	150275|CCDC117(2.394)	79572|ATP13A3(2.394)	2634|GBP2(2.394)	1785|DNM2(2.394)	8419|BFSP2(2.394)	83548|COG3(2.394)	9363|RAB33A(2.394)	51599|LSR(2.394)	152926|PPM1K(2.394)	401409|RAB19(2.394)	79618|HMBOX1(2.394)	4893|NRAS(2.394)	347517|RAB41(2.394)
Alpha-Humulene	ID:23256 From TCMID database	3750|KCND1(80.882)	3738|KCNA3(80.882)	5564|PRKAB1(80.882)	124|ADH1A(80.882)	3744|KCNA10(80.882)	2593|GAMT(80.882)	3748|KCNC3(80.882)	3736|KCNA1(80.882)	3737|KCNA2(80.882)	7173|TPO(80.882)	847|CAT(80.882)	3745|KCNB1(80.882)	125|ADH1B(80.882)	1742|DLG4(80.882)	3747|KCNC2(80.882)	3746|KCNC1(80.882)	126|ADH1C(80.882)	9312|KCNB2(80.882)	3741|KCNA5(80.882)	6035|RNASE1(80.882)	3751|KCND2(80.882)	217|ALDH2(80.882)	3739|KCNA4(80.882)	3743|KCNA7(80.882)	3742|KCNA6(80.882)	3752|KCND3(80.882)	2983|GUCY1B3(55.444)	2628|GATM(55.444)	50801|KCNK4(55.444)	389434|IYD(55.444)	3784|KCNQ1(55.444)	2203|FBP1(22.373)	9162|DGKI(22.373)	131|ADH7(22.373)	4781|NFIB(22.373)	114757|CYGB(22.373)	9369|NRXN3(22.373)	94030|LRRC4B(22.373)	343|AQP8(22.373)	170302|ARX(22.373)	3479|IGF1(22.373)	85358|SHANK3(22.373)	91703|ACY3(22.373)	443|ASPA(22.373)	9378|NRXN1(22.373)	1906|EDN1(22.373)	5020|OXT(22.373)	9863|MAGI2(22.373)
Trans-Beta-Farnesene	ID:25127 From TCMID database	3750|KCND1(80.882)	3738|KCNA3(80.882)	5564|PRKAB1(80.882)	124|ADH1A(80.882)	3744|KCNA10(80.882)	2593|GAMT(80.882)	3748|KCNC3(80.882)	3736|KCNA1(80.882)	3737|KCNA2(80.882)	7173|TPO(80.882)	847|CAT(80.882)	3745|KCNB1(80.882)	125|ADH1B(80.882)	1742|DLG4(80.882)	3747|KCNC2(80.882)	3746|KCNC1(80.882)	126|ADH1C(80.882)	9312|KCNB2(80.882)	3741|KCNA5(80.882)	6035|RNASE1(80.882)	3751|KCND2(80.882)	217|ALDH2(80.882)	3739|KCNA4(80.882)	3743|KCNA7(80.882)	3742|KCNA6(80.882)	3752|KCND3(80.882)	2983|GUCY1B3(55.444)	2628|GATM(55.444)	50801|KCNK4(55.444)	389434|IYD(55.444)	3784|KCNQ1(55.444)	2203|FBP1(22.373)	9162|DGKI(22.373)	131|ADH7(22.373)	4781|NFIB(22.373)	114757|CYGB(22.373)	9369|NRXN3(22.373)	94030|LRRC4B(22.373)	343|AQP8(22.373)	170302|ARX(22.373)	3479|IGF1(22.373)	85358|SHANK3(22.373)	91703|ACY3(22.373)	443|ASPA(22.373)	9378|NRXN1(22.373)	1906|EDN1(22.373)	5020|OXT(22.373)	9863|MAGI2(22.373)
(S)-Carvone	ID:23157 From TCMID database	1586|CYP17A1(122.778)	2099|ESR1(122.778)	5241|PGR(122.778)	4986|OPRK1(122.778)	4306|NR3C2(122.778)	27115|PDE7B(80.882)	8654|PDE5A(80.882)	5152|PDE9A(80.882)	5141|PDE4A(80.882)	6261|RYR1(80.882)	5139|PDE3A(80.882)	135|ADORA2A(80.882)	3708|ITPR1(80.882)	5145|PDE6A(80.882)	5591|PRKDC(80.882)	5293|PIK3CD(80.882)	5140|PDE3B(80.882)	5226|PGD(80.882)	5290|PIK3CA(80.882)	136|ADORA2B(80.882)	5136|PDE1A(80.882)	5144|PDE4D(80.882)	5291|PIK3CB(80.882)	3709|ITPR2(80.882)	5153|PDE1B(80.882)	5150|PDE7A(80.882)	3710|ITPR3(80.882)	23649|POLA2(80.882)	5143|PDE4C(80.882)	10846|PDE10A(80.882)	5137|PDE1C(80.882)	472|ATM(80.882)	5158|PDE6B(80.882)	5142|PDE4B(80.882)	5138|PDE2A(80.882)	134|ADORA1(80.882)	1588|CYP19A1(80.882)	8622|PDE8B(80.882)	4907|NT5E(80.882)	3066|HDAC2(80.882)	5146|PDE6C(80.882)	50940|PDE11A(80.882)	5151|PDE8A(80.882)	60561|RINT1(55.444)	8737|RIPK1(55.444)	5295|PIK3R1(55.444)	54361|WNT4(55.444)	6865|TACR2(55.444)
(+)-Oxypeucedanin	ID:16446 From TCMID database	148|ADRA1A(8.253)	146|ADRA1D(8.253)	3757|KCNH2(8.253)	147|ADRA1B(8.253)	1429|CRYZ(5.785)	79001|VKORC1(5.785)	6286|S100P(5.785)	1728|NQO1(5.785)	3778|KCNMA1(5.785)	4790|NFKB1(3.351)	4543|MTNR1A(3.351)	10800|CYSLTR1(3.351)	81033|KCNH6(3.351)	7124|TNF(3.351)	4544|MTNR1B(3.351)	6037|RNASE3(3.351)	4583|MUC2(3.351)	3567|IL5(3.351)	8856|NR1I2(3.351)	3758|KCNJ1(3.351)	90134|KCNH7(3.351)	6833|ABCC8(3.351)	1956|EGFR(3.351)	6530|SLC6A2(3.351)	154|ADRB2(2.608)	3351|HTR1B(2.608)	759|CA1(2.608)	153|ADRB1(2.608)	3350|HTR1A(2.608)	5465|PPARA(2.608)	155|ADRB3(2.608)	|(2.394)	57573|ZNF471(2.394)	8563|THOC5(2.394)	8434|RECK(2.394)	10309|CCNO(2.394)	7652|ZNF99(2.394)	80176|SPSB1(2.394)	386678|KRTAP10-11(2.394)	1387|CREBBP(2.394)	55854|ZC3H15(2.394)	150275|CCDC117(2.394)	79572|ATP13A3(2.394)	2634|GBP2(2.394)	1785|DNM2(2.394)	8419|BFSP2(2.394)	83548|COG3(2.394)	9363|RAB33A(2.394)
1-Pentadecene	ID:16820 From TCMID database	3750|KCND1(80.882)	3738|KCNA3(80.882)	5564|PRKAB1(80.882)	124|ADH1A(80.882)	3744|KCNA10(80.882)	2593|GAMT(80.882)	3748|KCNC3(80.882)	3736|KCNA1(80.882)	3737|KCNA2(80.882)	7173|TPO(80.882)	847|CAT(80.882)	3745|KCNB1(80.882)	125|ADH1B(80.882)	1742|DLG4(80.882)	3747|KCNC2(80.882)	3746|KCNC1(80.882)	126|ADH1C(80.882)	9312|KCNB2(80.882)	3741|KCNA5(80.882)	6035|RNASE1(80.882)	3751|KCND2(80.882)	217|ALDH2(80.882)	3739|KCNA4(80.882)	3743|KCNA7(80.882)	3742|KCNA6(80.882)	3752|KCND3(80.882)	2983|GUCY1B3(55.444)	2628|GATM(55.444)	50801|KCNK4(55.444)	389434|IYD(55.444)	3784|KCNQ1(55.444)	2203|FBP1(22.373)	9162|DGKI(22.373)	131|ADH7(22.373)	4781|NFIB(22.373)	114757|CYGB(22.373)	9369|NRXN3(22.373)	94030|LRRC4B(22.373)	343|AQP8(22.373)	170302|ARX(22.373)	3479|IGF1(22.373)	85358|SHANK3(22.373)	91703|ACY3(22.373)	443|ASPA(22.373)	9378|NRXN1(22.373)	1906|EDN1(22.373)	5020|OXT(22.373)	9863|MAGI2(22.373)
Ethyl Acetate	ID:7417 From TCMID database	781|CACNA2D1(23.000)	8912|CACNA1H(23.000)	778|CACNA1F(23.000)	9254|CACNA2D2(23.000)	779|CACNA1S(23.000)	5136|PDE1A(23.000)	5153|PDE1B(23.000)	775|CACNA1C(23.000)	776|CACNA1D(23.000)	7134|TNNC1(23.000)	805|CALM2(23.000)	783|CACNB2(23.000)	7125|TNNC2(23.000)	808|CALM3(23.000)	801|CALM1(23.000)	4306|NR3C2(23.000)	668|FOXL2(22.373)	8913|CACNA1G(22.373)	7139|TNNT2(22.373)	2039|DMTN(22.373)	3778|KCNMA1(22.373)	810|CALML3(15.365)	5742|PTGS1(15.365)	5743|PTGS2(15.365)	6337|SCNN1A(8.253)	41|ASIC1(8.253)	3786|KCNQ3(8.253)	6558|SLC12A2(8.253)	6340|SCNN1G(8.253)	5320|PLA2G2A(8.253)	6548|SLC9A1(8.253)	759|CA1(8.253)	6326|SCN2A(8.253)	6559|SLC12A3(8.253)	5328|PLAU(8.253)	64805|P2RY12(8.253)	26|AOC1(8.253)	762|CA4(8.253)	6329|SCN4A(8.253)	6339|SCNN1D(8.253)	6608|SMO(8.253)	240|ALOX5(8.253)	40|ASIC2(8.253)	6557|SLC12A1(8.253)	3785|KCNQ2(8.253)	5465|PPARA(8.253)	760|CA2(8.253)	6338|SCNN1B(8.253)
Monomethyl-Cis-Hinokiresinol	ID:14918 From TCMID database	2104|ESRRG(48.000)	2100|ESR2(48.000)	2099|ESR1(48.000)	1269|CNR2(23.000)	7299|TYR(23.000)	1268|CNR1(23.000)	266629|SEC14L3(15.365)	5515|PPP2CA(15.365)	5578|PRKCA(15.365)	8856|NR1I2(15.365)	240|ALOX5(15.365)	5516|PPP2CB(15.365)	23541|SEC14L2(15.365)	1606|DGKA(15.365)	5579|PRKCB(15.365)	284904|SEC14L4(15.365)	148|ADRA1A(8.253)	5141|PDE4A(8.253)	5139|PDE3A(8.253)	150|ADRA2A(8.253)	146|ADRA1D(8.253)	775|CACNA1C(8.253)	1787|TRDMT1(8.253)	200895|DHFRL1(8.253)	1719|DHFR(8.253)	147|ADRA1B(8.253)	152|ADRA2C(8.253)	10846|PDE10A(8.253)	5138|PDE2A(8.253)	151|ADRA2B(8.253)	7298|TYMS(8.253)	1638|DCT(5.859)	207|AKT1(5.859)	9290|GPR55(5.859)	1813|DRD2(5.859)	7306|TYRP1(5.859)	8943|AP3D1(5.859)	440503|PLIN5(5.859)	4948|OCA2(5.859)	4935|GPR143(5.859)	6257|RXRB(5.785)	5581|PRKCE(5.785)	10682|EBP(5.785)	5916|RARG(5.785)	5915|RARB(5.785)	6258|RXRG(5.785)	5588|PRKCQ(5.785)	5742|PTGS1(5.785)
Peonol	ID:23530 From TCMID database	6646|SOAT1(23.000)	4547|MTTP(23.000)	1269|CNR2(23.000)	1268|CNR1(23.000)	8435|SOAT2(23.000)	1813|DRD2(22.373)	5074|PAWR(22.373)	2099|ESR1(15.365)	2677|GGCX(15.365)	7299|TYR(15.365)	5742|PTGS1(15.365)	5743|PTGS2(15.365)	266629|SEC14L3(8.253)	5139|PDE3A(8.253)	2100|ESR2(8.253)	4985|OPRD1(8.253)	5515|PPP2CA(8.253)	4986|OPRK1(8.253)	5578|PRKCA(8.253)	4988|OPRM1(8.253)	8856|NR1I2(8.253)	3292|HSD17B1(8.253)	240|ALOX5(8.253)	5516|PPP2CB(8.253)	23541|SEC14L2(8.253)	1606|DGKA(8.253)	5579|PRKCB(8.253)	284904|SEC14L4(8.253)	207|AKT1(5.859)	948|CD36(5.859)	1236|CCR7(5.859)	57406|ABHD6(5.859)	11343|MGLL(5.859)	2207|FCER1G(5.859)	7341|SUMO1(5.859)	350|APOH(5.859)	9290|GPR55(5.859)	1141|CHRNB2(5.859)	1071|CETP(5.859)	2205|FCER1A(5.859)	859|CAV3(5.859)	388591|RNF207(5.859)	718|C3(5.859)	747|DAGLA(5.859)	440503|PLIN5(5.859)	7784|ZP3(5.859)	6531|SLC6A3(5.785)	6257|RXRB(5.785)
Scopoletin	ID:19527 From TCMID database	1312|COMT(373.000)	266629|SEC14L3(23.000)	5515|PPP2CA(23.000)	5578|PRKCA(23.000)	8856|NR1I2(23.000)	240|ALOX5(23.000)	5516|PPP2CB(23.000)	23541|SEC14L2(23.000)	1606|DGKA(23.000)	5579|PRKCB(23.000)	284904|SEC14L4(23.000)	1429|CRYZ(15.365)	1269|CNR2(15.365)	79001|VKORC1(15.365)	7299|TYR(15.365)	1268|CNR1(15.365)	1728|NQO1(15.365)	730005|SEC14L6(8.253)	6646|SOAT1(8.253)	4547|MTTP(8.253)	8435|SOAT2(8.253)	5582|PRKCG(8.253)	6513|SLC2A1(5.859)	3728|JUP(5.859)	5318|PKP2(5.859)	5054|SERPINE1(5.859)	5270|SERPINE2(5.859)	6348|CCL3(5.859)	9429|ABCG2(5.859)	8651|SOCS1(5.859)	5771|PTPN2(5.859)	7274|TTPA(5.859)	1113|CHGA(5.859)	5518|PPP2R1A(5.859)	5244|ABCB4(5.859)	11187|PKP3(5.859)	4771|NF2(5.859)	5243|ABCB1(5.859)	173|AFM(5.859)	5978|REST(5.859)	5531|PPP4C(3.351)	5537|PPP6C(3.351)	1646|AKR1C2(3.138)	1645|AKR1C1(3.138)	5742|PTGS1(3.138)	5743|PTGS2(3.138)	6286|S100P(2.608)	3778|KCNMA1(2.608)
Oxypeucedanin Hydrate	ID:25387 From TCMID database	6286|S100P(8.253)	3778|KCNMA1(8.253)	1429|CRYZ(5.785)	79001|VKORC1(5.785)	1728|NQO1(5.785)	1244|ABCC2(3.351)	2203|FBP1(3.351)	207|AKT1(3.351)	5564|PRKAB1(3.351)	90|ACVR1(3.351)	439|ASNA1(3.351)	157|ADRBK2(3.351)	55902|ACSS2(3.351)	7153|TOP2A(3.351)	135|ADORA2A(3.351)	94|ACVRL1(3.351)	107|ADCY1(3.351)	4985|OPRD1(3.351)	22978|NT5C2(3.351)	269|AMHR2(3.351)	10188|TNK2(3.351)	2099|ESR1(3.351)	440|ASNS(3.351)	132|ADK(3.351)	27|ABL2(3.351)	156|ADRBK1(3.351)	759|CA1(3.351)	136|ADORA2B(3.351)	5144|PDE4D(3.351)	4986|OPRK1(3.351)	6524|SLC5A2(3.351)	292|SLC25A5(3.351)	4988|OPRM1(3.351)	5562|PRKAA1(3.351)	10060|ABCC9(3.351)	1385|CREB1(3.351)	84532|ACSS1(3.351)	5292|PIM1(3.351)	5836|PYGL(3.351)	25|ABL1(3.351)	10939|AFG3L2(3.351)	65061|CDK15(3.351)	140|ADORA3(3.351)	3094|HINT1(3.351)	445|ASS1(3.351)	91|ACVR1B(3.351)	2180|ACSL1(3.351)	19|ABCA1(3.351)
Angelicin	ID:1191 From TCMID database	6646|SOAT1(140.500)	290|ANPEP(140.500)	29881|NPC1L1(140.500)	2099|ESR1(122.778)	5241|PGR(122.778)	1244|ABCC2(114.143)	207|AKT1(114.143)	90|ACVR1(114.143)	439|ASNA1(114.143)	157|ADRBK2(114.143)	55902|ACSS2(114.143)	94|ACVRL1(114.143)	107|ADCY1(114.143)	22978|NT5C2(114.143)	269|AMHR2(114.143)	10188|TNK2(114.143)	440|ASNS(114.143)	27|ABL2(114.143)	156|ADRBK1(114.143)	5562|PRKAA1(114.143)	10060|ABCC9(114.143)	84532|ACSS1(114.143)	25|ABL1(114.143)	10939|AFG3L2(114.143)	65061|CDK15(114.143)	445|ASS1(114.143)	91|ACVR1B(114.143)	2180|ACSL1(114.143)	19|ABCA1(114.143)	8883|NAE1(114.143)	317|APAF1(114.143)	6833|ABCC8(114.143)	238|ALK(114.143)	8647|ABCB11(114.143)	5243|ABCB1(114.143)	9619|ABCG1(114.143)	369|ARAF(114.143)	291|SLC25A4(114.143)	7421|VDR(80.882)	1594|CYP27B1(80.882)	2638|GC(55.444)	22938|SNW1(55.444)	367|AR(48.000)	2908|NR3C1(48.000)	10000|AKT3(25.857)	292|SLC25A5(25.857)	293|SLC25A6(25.857)	208|AKT2(25.857)
Geranyl Propionate	ID:24453 From TCMID database	2555|GABRA2(15.365)	2563|GABRD(15.365)	2560|GABRB1(15.365)	2567|GABRG3(15.365)	2099|ESR1(15.365)	2564|GABRE(15.365)	2556|GABRA3(15.365)	2565|GABRG1(15.365)	5241|PGR(15.365)	2568|GABRP(15.365)	2557|GABRA4(15.365)	2561|GABRB2(15.365)	55879|GABRQ(15.365)	2562|GABRB3(15.365)	2558|GABRA5(15.365)	2559|GABRA6(15.365)	2554|GABRA1(15.365)	2566|GABRG2(15.365)	151|ADRA2B(15.365)	4881|NPR1(8.253)	5731|PTGER1(5.785)	5734|PTGER4(5.785)	5732|PTGER2(5.785)	5733|PTGER3(5.785)	781|CACNA2D1(3.351)	8912|CACNA1H(3.351)	1131|CHRM3(3.351)	1128|CHRM1(3.351)	9254|CACNA2D2(3.351)	3736|KCNA1(3.351)	7173|TPO(3.351)	810|CALML3(3.351)	779|CACNA1S(3.351)	367|AR(3.351)	2908|NR3C1(3.351)	775|CACNA1C(3.351)	776|CACNA1D(3.351)	805|CALM2(3.351)	783|CACNB2(3.351)	808|CALM3(3.351)	1129|CHRM2(3.351)	801|CALM1(3.351)	786|CACNG1(3.351)	6257|RXRB(2.608)	5327|PLAT(2.608)	18|ABAT(2.608)	5141|PDE4A(2.608)	6546|SLC8A1(2.608)
Pachycarin A	ID:16478 From TCMID database	4790|NFKB1(15.365)	10800|CYSLTR1(15.365)	203068|TUBB(15.365)	7124|TNF(15.365)	6037|RNASE3(15.365)	4583|MUC2(15.365)	3567|IL5(15.365)	81027|TUBB1(15.365)	10381|TUBB3(8.253)	148|ADRA1A(8.253)	150|ADRA2A(8.253)	81033|KCNH6(8.253)	10382|TUBB4A(8.253)	84617|TUBB6(8.253)	347688|TUBB8(8.253)	146|ADRA1D(8.253)	347733|TUBB2B(8.253)	3757|KCNH2(8.253)	10383|TUBB4B(8.253)	147|ADRA1B(8.253)	7280|TUBB2A(8.253)	90134|KCNH7(8.253)	151|ADRA2B(8.253)	6286|S100P(5.785)	3778|KCNMA1(5.785)	6646|SOAT1(3.351)	4543|MTNR1A(3.351)	4547|MTTP(3.351)	1269|CNR2(3.351)	4544|MTNR1B(3.351)	2677|GGCX(3.351)	5021|OXTR(3.351)	1268|CNR1(3.351)	5742|PTGS1(3.351)	5743|PTGS2(3.351)	8435|SOAT2(3.351)	6036|RNASE2(3.351)	1128|CHRM1(2.608)	1129|CHRM2(2.608)	|(2.394)	57573|ZNF471(2.394)	8563|THOC5(2.394)	8434|RECK(2.394)	10309|CCNO(2.394)	7652|ZNF99(2.394)	80176|SPSB1(2.394)	386678|KRTAP10-11(2.394)	1387|CREBBP(2.394)
Humulene	ID:24037 From TCMID database	3750|KCND1(80.882)	3738|KCNA3(80.882)	5564|PRKAB1(80.882)	124|ADH1A(80.882)	3744|KCNA10(80.882)	2593|GAMT(80.882)	3748|KCNC3(80.882)	3736|KCNA1(80.882)	3737|KCNA2(80.882)	7173|TPO(80.882)	847|CAT(80.882)	3745|KCNB1(80.882)	125|ADH1B(80.882)	1742|DLG4(80.882)	3747|KCNC2(80.882)	3746|KCNC1(80.882)	126|ADH1C(80.882)	9312|KCNB2(80.882)	3741|KCNA5(80.882)	6035|RNASE1(80.882)	3751|KCND2(80.882)	217|ALDH2(80.882)	3739|KCNA4(80.882)	3743|KCNA7(80.882)	3742|KCNA6(80.882)	3752|KCND3(80.882)	2983|GUCY1B3(55.444)	2628|GATM(55.444)	50801|KCNK4(55.444)	389434|IYD(55.444)	3784|KCNQ1(55.444)	2203|FBP1(22.373)	9162|DGKI(22.373)	131|ADH7(22.373)	4781|NFIB(22.373)	114757|CYGB(22.373)	9369|NRXN3(22.373)	94030|LRRC4B(22.373)	343|AQP8(22.373)	170302|ARX(22.373)	3479|IGF1(22.373)	85358|SHANK3(22.373)	91703|ACY3(22.373)	443|ASPA(22.373)	9378|NRXN1(22.373)	1906|EDN1(22.373)	5020|OXT(22.373)	9863|MAGI2(22.373)
Methylcyclohexane	ID:14263 From TCMID database	3750|KCND1(80.882)	3738|KCNA3(80.882)	5564|PRKAB1(80.882)	124|ADH1A(80.882)	3744|KCNA10(80.882)	2593|GAMT(80.882)	3748|KCNC3(80.882)	3736|KCNA1(80.882)	3737|KCNA2(80.882)	7173|TPO(80.882)	847|CAT(80.882)	3745|KCNB1(80.882)	125|ADH1B(80.882)	1742|DLG4(80.882)	3747|KCNC2(80.882)	3746|KCNC1(80.882)	126|ADH1C(80.882)	9312|KCNB2(80.882)	3741|KCNA5(80.882)	6035|RNASE1(80.882)	3751|KCND2(80.882)	217|ALDH2(80.882)	3739|KCNA4(80.882)	3743|KCNA7(80.882)	3742|KCNA6(80.882)	3752|KCND3(80.882)	2983|GUCY1B3(55.444)	2628|GATM(55.444)	50801|KCNK4(55.444)	389434|IYD(55.444)	3784|KCNQ1(55.444)	2203|FBP1(22.373)	9162|DGKI(22.373)	131|ADH7(22.373)	4781|NFIB(22.373)	114757|CYGB(22.373)	9369|NRXN3(22.373)	94030|LRRC4B(22.373)	343|AQP8(22.373)	170302|ARX(22.373)	3479|IGF1(22.373)	85358|SHANK3(22.373)	91703|ACY3(22.373)	443|ASPA(22.373)	9378|NRXN1(22.373)	1906|EDN1(22.373)	5020|OXT(22.373)	9863|MAGI2(22.373)
Sendanone Acetate	ID:19690 From TCMID database	2908|NR3C1(48.000)	476|ATP1A1(48.000)	4306|NR3C2(23.000)	2280|FKBP1A(8.253)	2099|ESR1(8.253)	5241|PGR(8.253)	367|AR(8.253)	2475|MTOR(8.253)	2194|FASN(8.253)	1588|CYP19A1(8.253)	2247|FGF2(8.253)	782|CACNB1(5.785)	781|CACNA2D1(5.785)	6715|SRD5A1(5.785)	8912|CACNA1H(5.785)	7852|CXCR4(5.785)	778|CACNA1F(5.785)	2548|GAA(5.785)	8972|MGAM(5.785)	55244|SLC47A1(5.785)	773|CACNA1A(5.785)	1576|CYP3A4(5.785)	8911|CACNA1I(5.785)	8001|GLRA3(5.785)	9254|CACNA2D2(5.785)	5740|PTGIS(5.785)	6462|SHBG(5.785)	1595|CYP51A1(5.785)	779|CACNA1S(5.785)	5734|PTGER4(5.785)	55799|CACNA2D3(5.785)	785|CACNB4(5.785)	64805|P2RY12(5.785)	5739|PTGIR(5.785)	774|CACNA1B(5.785)	775|CACNA1C(5.785)	5578|PRKCA(5.785)	776|CACNA1D(5.785)	3156|HMGCR(5.785)	279|AMY2A(5.785)	784|CACNB3(5.785)	3757|KCNH2(5.785)	3689|ITGB2(5.785)	5732|PTGER2(5.785)	5733|PTGER3(5.785)	6608|SMO(5.785)	2562|GABRB3(5.785)	6476|SI(5.785)
Marmesin	ID:13564 From TCMID database	2099|ESR1(8.253)	1429|CRYZ(5.785)	154|ADRB2(5.785)	1131|CHRM3(5.785)	4543|MTNR1A(5.785)	1128|CHRM1(5.785)	4985|OPRD1(5.785)	3351|HTR1B(5.785)	4544|MTNR1B(5.785)	153|ADRB1(5.785)	79001|VKORC1(5.785)	4986|OPRK1(5.785)	1133|CHRM5(5.785)	4988|OPRM1(5.785)	3350|HTR1A(5.785)	6286|S100P(5.785)	1728|NQO1(5.785)	3778|KCNMA1(5.785)	1129|CHRM2(5.785)	1132|CHRM4(5.785)	6531|SLC6A3(3.351)	266629|SEC14L3(3.351)	5515|PPP2CA(3.351)	3358|HTR2C(3.351)	4023|LPL(3.351)	5578|PRKCA(3.351)	6532|SLC6A4(3.351)	8856|NR1I2(3.351)	5004|ORM1(3.351)	240|ALOX5(3.351)	5516|PPP2CB(3.351)	116443|GRIN3A(3.351)	23541|SEC14L2(3.351)	1606|DGKA(3.351)	5579|PRKCB(3.351)	5005|ORM2(3.351)	284904|SEC14L4(3.351)	6530|SLC6A2(3.351)	6257|RXRB(2.608)	782|CACNB1(2.608)	1146|CHRNG(2.608)	8912|CACNA1H(2.608)	4790|NFKB1(2.608)	148|ADRA1A(2.608)	6323|SCN1A(2.608)	3859|KRT12(2.608)	778|CACNA1F(2.608)	1137|CHRNA4(2.608)
Byakangelicin	ID:2833 From TCMID database	6286|S100P(8.253)	3778|KCNMA1(8.253)	1244|ABCC2(3.351)	2203|FBP1(3.351)	207|AKT1(3.351)	5564|PRKAB1(3.351)	90|ACVR1(3.351)	439|ASNA1(3.351)	157|ADRBK2(3.351)	55902|ACSS2(3.351)	7153|TOP2A(3.351)	135|ADORA2A(3.351)	94|ACVRL1(3.351)	107|ADCY1(3.351)	4985|OPRD1(3.351)	22978|NT5C2(3.351)	269|AMHR2(3.351)	10188|TNK2(3.351)	2099|ESR1(3.351)	440|ASNS(3.351)	132|ADK(3.351)	27|ABL2(3.351)	156|ADRBK1(3.351)	759|CA1(3.351)	136|ADORA2B(3.351)	5144|PDE4D(3.351)	4986|OPRK1(3.351)	6524|SLC5A2(3.351)	292|SLC25A5(3.351)	4988|OPRM1(3.351)	5562|PRKAA1(3.351)	10060|ABCC9(3.351)	1385|CREB1(3.351)	84532|ACSS1(3.351)	5292|PIM1(3.351)	5836|PYGL(3.351)	25|ABL1(3.351)	10939|AFG3L2(3.351)	65061|CDK15(3.351)	140|ADORA3(3.351)	3094|HINT1(3.351)	445|ASS1(3.351)	91|ACVR1B(3.351)	2180|ACSL1(3.351)	19|ABCA1(3.351)	293|SLC25A6(3.351)	5142|PDE4B(3.351)	8883|NAE1(3.351)
Lauric Acid, Ethyl Ester	ID:24642 From TCMID database	367|AR(122.778)	4881|NPR1(80.882)	1128|CHRM1(48.000)	6718|AKR1D1(48.000)	7299|TYR(48.000)	6716|SRD5A2(48.000)	1129|CHRM2(48.000)	4883|NPR3(22.373)	4882|NPR2(22.373)	6336|SCN10A(8.253)	43|ACHE(8.253)	590|BCHE(8.253)	2979|GUCA1B(5.859)	6863|TAC1(5.859)	3827|KNG1(5.859)	2788|GNG7(5.859)	552|AVPR1A(5.859)	135|ADORA2A(5.859)	1906|EDN1(5.859)	5020|OXT(5.859)	2986|GUCY2F(5.859)	2983|GUCY1B3(5.859)	4987|OPRL1(5.859)	7021|TFAP2B(5.859)	183|AGT(5.859)	4880|NPPC(5.859)	2984|GUCY2C(5.859)	2977|GUCY1A2(5.859)	1813|DRD2(5.859)	3037|HAS2(5.859)	51763|INPP5K(5.859)	685|BTC(5.859)	186|AGTR2(5.859)	3000|GUCY2D(5.859)	5733|PTGER3(5.859)	1814|DRD3(5.859)	8692|HYAL2(5.859)	4878|NPPA(5.859)	79849|PDZD3(5.859)	2982|GUCY1A3(5.859)	4879|NPPB(5.859)	11280|SCN11A(5.785)	6327|SCN2B(5.785)	781|CACNA2D1(5.785)	5327|PLAT(5.785)	18|ABAT(5.785)	6323|SCN1A(5.785)	2104|ESRRG(5.785)
Isoimperatorin	ID:11459 From TCMID database	4790|NFKB1(15.365)	10800|CYSLTR1(15.365)	7124|TNF(15.365)	6037|RNASE3(15.365)	4583|MUC2(15.365)	3567|IL5(15.365)	148|ADRA1A(8.253)	5141|PDE4A(8.253)	5139|PDE3A(8.253)	150|ADRA2A(8.253)	81033|KCNH6(8.253)	1269|CNR2(8.253)	146|ADRA1D(8.253)	775|CACNA1C(8.253)	1268|CNR1(8.253)	3757|KCNH2(8.253)	1787|TRDMT1(8.253)	200895|DHFRL1(8.253)	1719|DHFR(8.253)	147|ADRA1B(8.253)	10846|PDE10A(8.253)	5138|PDE2A(8.253)	90134|KCNH7(8.253)	151|ADRA2B(8.253)	7298|TYMS(8.253)	1429|CRYZ(5.785)	79001|VKORC1(5.785)	6286|S100P(5.785)	1728|NQO1(5.785)	3778|KCNMA1(5.785)	811|CALR(3.351)	7153|TOP2A(3.351)	3356|HTR2A(3.351)	1131|CHRM3(3.351)	4835|NQO2(3.351)	4543|MTNR1A(3.351)	1128|CHRM1(3.351)	3357|HTR2B(3.351)	2099|ESR1(3.351)	4544|MTNR1B(3.351)	3362|HTR6(3.351)	438|ASMT(3.351)	810|CALML3(3.351)	4353|MPO(3.351)	3358|HTR2C(3.351)	1813|DRD2(3.351)	1133|CHRM5(3.351)	6532|SLC6A4(3.351)
Oxypeucedanin	ID:24185 From TCMID database	10381|TUBB3(3.351)	7153|TOP2A(3.351)	203068|TUBB(3.351)	10382|TUBB4A(3.351)	6331|SCN5A(3.351)	112714|TUBA3E(3.351)	3614|IMPDH1(3.351)	6570|SLC18A1(3.351)	347733|TUBB2B(3.351)	6571|SLC18A2(3.351)	1636|ACE(3.351)	10383|TUBB4B(3.351)	1135|CHRNA2(3.351)	7278|TUBA3C(3.351)	84790|TUBA1C(3.351)	7280|TUBB2A(3.351)	10376|TUBA1B(3.351)	3615|IMPDH2(3.351)	185|AGTR1(3.351)	7277|TUBA4A(3.351)	1129|CHRM2(3.351)	113457|TUBA3D(3.351)	7846|TUBA1A(3.351)	6271|S100A1(2.608)	3859|KRT12(2.608)	6646|SOAT1(2.608)	1131|CHRM3(2.608)	4547|MTTP(2.608)	1128|CHRM1(2.608)	4985|OPRD1(2.608)	7099|TLR4(2.608)	6284|S100A13(2.608)	2099|ESR1(2.608)	1595|CYP51A1(2.608)	6283|S100A12(2.608)	4986|OPRK1(2.608)	6524|SLC5A2(2.608)	1133|CHRM5(2.608)	4988|OPRM1(2.608)	8856|NR1I2(2.608)	3269|HRH1(2.608)	6273|S100A2(2.608)	1385|CREB1(2.608)	3274|HRH2(2.608)	6579|SLCO1A2(2.608)	8435|SOAT2(2.608)	28234|SLCO1B3(2.608)	213|ALB(2.608)
Limonene	ID:23184 From TCMID database	3750|KCND1(80.882)	3738|KCNA3(80.882)	5564|PRKAB1(80.882)	124|ADH1A(80.882)	3744|KCNA10(80.882)	2593|GAMT(80.882)	3748|KCNC3(80.882)	3736|KCNA1(80.882)	3737|KCNA2(80.882)	7173|TPO(80.882)	847|CAT(80.882)	3745|KCNB1(80.882)	125|ADH1B(80.882)	1742|DLG4(80.882)	3747|KCNC2(80.882)	3746|KCNC1(80.882)	126|ADH1C(80.882)	9312|KCNB2(80.882)	3741|KCNA5(80.882)	6035|RNASE1(80.882)	3751|KCND2(80.882)	217|ALDH2(80.882)	3739|KCNA4(80.882)	3743|KCNA7(80.882)	3742|KCNA6(80.882)	3752|KCND3(80.882)	2983|GUCY1B3(55.444)	2628|GATM(55.444)	50801|KCNK4(55.444)	389434|IYD(55.444)	3784|KCNQ1(55.444)	1586|CYP17A1(48.000)	2099|ESR1(48.000)	5241|PGR(48.000)	4986|OPRK1(48.000)	4306|NR3C2(48.000)	2203|FBP1(22.373)	9162|DGKI(22.373)	131|ADH7(22.373)	4781|NFIB(22.373)	114757|CYGB(22.373)	9369|NRXN3(22.373)	94030|LRRC4B(22.373)	343|AQP8(22.373)	170302|ARX(22.373)	3479|IGF1(22.373)	85358|SHANK3(22.373)	91703|ACY3(22.373)
L-Carvone	ID:23289 From TCMID database	1586|CYP17A1(122.778)	2099|ESR1(122.778)	5241|PGR(122.778)	4986|OPRK1(122.778)	4306|NR3C2(122.778)	27115|PDE7B(80.882)	8654|PDE5A(80.882)	5152|PDE9A(80.882)	5141|PDE4A(80.882)	6261|RYR1(80.882)	5139|PDE3A(80.882)	135|ADORA2A(80.882)	3708|ITPR1(80.882)	5145|PDE6A(80.882)	5591|PRKDC(80.882)	5293|PIK3CD(80.882)	5140|PDE3B(80.882)	5226|PGD(80.882)	5290|PIK3CA(80.882)	136|ADORA2B(80.882)	5136|PDE1A(80.882)	5144|PDE4D(80.882)	5291|PIK3CB(80.882)	3709|ITPR2(80.882)	5153|PDE1B(80.882)	5150|PDE7A(80.882)	3710|ITPR3(80.882)	23649|POLA2(80.882)	5143|PDE4C(80.882)	10846|PDE10A(80.882)	5137|PDE1C(80.882)	472|ATM(80.882)	5158|PDE6B(80.882)	5142|PDE4B(80.882)	5138|PDE2A(80.882)	134|ADORA1(80.882)	1588|CYP19A1(80.882)	8622|PDE8B(80.882)	4907|NT5E(80.882)	3066|HDAC2(80.882)	5146|PDE6C(80.882)	50940|PDE11A(80.882)	5151|PDE8A(80.882)	60561|RINT1(55.444)	8737|RIPK1(55.444)	5295|PIK3R1(55.444)	54361|WNT4(55.444)	6865|TACR2(55.444)
Alpha-Pinene	ID:23880 From TCMID database	3750|KCND1(80.882)	3738|KCNA3(80.882)	5564|PRKAB1(80.882)	124|ADH1A(80.882)	3744|KCNA10(80.882)	2593|GAMT(80.882)	3748|KCNC3(80.882)	3736|KCNA1(80.882)	3737|KCNA2(80.882)	7173|TPO(80.882)	847|CAT(80.882)	3745|KCNB1(80.882)	125|ADH1B(80.882)	1742|DLG4(80.882)	3747|KCNC2(80.882)	3746|KCNC1(80.882)	126|ADH1C(80.882)	9312|KCNB2(80.882)	3741|KCNA5(80.882)	6035|RNASE1(80.882)	3751|KCND2(80.882)	217|ALDH2(80.882)	3739|KCNA4(80.882)	3743|KCNA7(80.882)	3742|KCNA6(80.882)	3752|KCND3(80.882)	2983|GUCY1B3(55.444)	2628|GATM(55.444)	50801|KCNK4(55.444)	389434|IYD(55.444)	3784|KCNQ1(55.444)	51109|RDH11(48.000)	5949|RBP3(48.000)	54884|RETSAT(48.000)	1586|CYP17A1(48.000)	112724|RDH13(48.000)	9249|DHRS3(48.000)	5959|RDH5(48.000)	2099|ESR1(48.000)	5241|PGR(48.000)	220|ALDH1A3(48.000)	145226|RDH12(48.000)	4986|OPRK1(48.000)	10901|DHRS4(48.000)	5947|RBP1(48.000)	216|ALDH1A1(48.000)	6017|RLBP1(48.000)	57665|RDH14(48.000)
Umbelliferone	ID:22179 From TCMID database	1429|CRYZ(80.882)	79001|VKORC1(80.882)	1728|NQO1(80.882)	84869|CBR4(55.444)	154807|VKORC1L1(55.444)	8529|CYP4F2(22.373)	57834|CYP4F11(22.373)	9946|CRYZL1(22.373)	6647|SOD1(22.373)	9973|CCS(22.373)	6649|SOD3(22.373)	6648|SOD2(22.373)	127|ADH4(22.373)	29914|UBIAD1(22.373)	873|CBR1(22.373)	9540|TP53I3(22.373)	5139|PDE3A(8.253)	5045|FURIN(5.859)	2946|GSTM2(5.859)	5627|PROS1(5.859)	5860|QDPR(5.859)	8858|PROZ(5.859)	79802|HHIPL2(5.859)	5446|PON3(5.859)	4552|MTRR(5.859)	64399|HHIP(5.859)	1723|DHODH(5.859)	5447|POR(5.859)	51706|CYB5R1(5.859)	2155|F7(5.859)	4843|NOS2(5.859)	2158|F9(5.859)	6390|SDHB(5.859)	1727|CYB5R3(5.859)	2677|GGCX(5.859)	7881|KCNAB1(5.859)	2621|GAS6(5.859)	1666|DECR1(5.859)	2159|F10(5.859)	84439|HHIPL1(5.859)	5624|PROC(5.859)	4720|NDUFS2(5.859)	27158|NDOR1(5.859)	26|AOC1(5.859)	2948|GSTM4(5.859)	3156|HMGCR(5.859)	874|CBR3(5.859)	1719|DHFR(5.859)
Terpinen-4-Ol	ID:20976 From TCMID database	2099|ESR1(122.778)	5241|PGR(122.778)	54361|WNT4(55.444)	367|AR(48.000)	2908|NR3C1(48.000)	7421|VDR(48.000)	7022|TFAP2C(22.373)	8600|TNFSF11(22.373)	5245|PHB(22.373)	27324|TOX3(22.373)	7040|TGFB1(22.373)	5469|MED1(22.373)	4824|NKX3-1(22.373)	2100|ESR2(22.373)	4734|NEDD4(22.373)	6469|SHH(22.373)	6317|SERPINB3(22.373)	51176|LEF1(22.373)	2263|FGFR2(22.373)	6714|SRC(22.373)	51366|UBR5(22.373)	374|AREG(22.373)	947|CD34(22.373)	2852|GPER1(22.373)	7474|WNT5A(22.373)	6662|SOX9(22.373)	5155|PDGFB(22.373)	8805|TRIM24(22.373)	2555|GABRA2(8.253)	2563|GABRD(8.253)	2560|GABRB1(8.253)	2567|GABRG3(8.253)	2564|GABRE(8.253)	2556|GABRA3(8.253)	2565|GABRG1(8.253)	2568|GABRP(8.253)	2557|GABRA4(8.253)	2561|GABRB2(8.253)	55879|GABRQ(8.253)	2562|GABRB3(8.253)	2558|GABRA5(8.253)	2559|GABRA6(8.253)	2554|GABRA1(8.253)	2566|GABRG2(8.253)	29842|TFCP2L1(5.859)	207|AKT1(5.859)	7494|XBP1(5.859)	23411|SIRT1(5.859)
Naphthalene	ID:15244 From TCMID database	4790|NFKB1(23.000)	10800|CYSLTR1(23.000)	7124|TNF(23.000)	6037|RNASE3(23.000)	4583|MUC2(23.000)	3567|IL5(23.000)	10221|TRIB1(22.373)	6386|SDCBP(22.373)	4049|LTA(22.373)	6256|RXRA(22.373)	148|ADRA1A(15.365)	150|ADRA2A(15.365)	81033|KCNH6(15.365)	2677|GGCX(15.365)	146|ADRA1D(15.365)	3757|KCNH2(15.365)	5742|PTGS1(15.365)	147|ADRA1B(15.365)	5743|PTGS2(15.365)	90134|KCNH7(15.365)	151|ADRA2B(15.365)	5139|PDE3A(8.253)	6646|SOAT1(8.253)	4547|MTTP(8.253)	203068|TUBB(8.253)	1269|CNR2(8.253)	10382|TUBB4A(8.253)	5021|OXTR(8.253)	347733|TUBB2B(8.253)	1268|CNR1(8.253)	10383|TUBB4B(8.253)	8435|SOAT2(8.253)	6036|RNASE2(8.253)	81027|TUBB1(8.253)	5970|RELA(5.859)	336|APOA2(5.859)	10507|SEMA4D(5.859)	8644|AKR1C3(5.859)	972|CD74(5.859)	3263|HPX(5.859)	57105|CYSLTR2(5.859)	4282|MIF(5.859)	84539|MCHR2(5.859)	6591|SNAI2(5.859)	4824|NKX3-1(5.859)	6615|SNAI1(5.859)	2624|GATA2(5.859)	356|FASLG(5.859)
P-Cymen-2-Ol	ID:24138 From TCMID database	2555|GABRA2(80.882)	2563|GABRD(80.882)	5139|PDE3A(80.882)	2560|GABRB1(80.882)	2567|GABRG3(80.882)	7124|TNF(80.882)	2564|GABRE(80.882)	6326|SCN2A(80.882)	2556|GABRA3(80.882)	2565|GABRG1(80.882)	2568|GABRP(80.882)	2557|GABRA4(80.882)	2561|GABRB2(80.882)	43|ACHE(80.882)	6329|SCN4A(80.882)	55879|GABRQ(80.882)	2562|GABRB3(80.882)	2558|GABRA5(80.882)	2559|GABRA6(80.882)	2554|GABRA1(80.882)	5142|PDE4B(80.882)	590|BCHE(80.882)	2566|GABRG2(80.882)	5140|PDE3B(55.444)	5144|PDE4D(55.444)	8292|COLQ(55.444)	4049|LTA(55.444)	6256|RXRA(55.444)	6531|SLC6A3(48.000)	1813|DRD2(48.000)	6532|SLC6A4(48.000)	1815|DRD4(48.000)	3363|HTR7(48.000)	3350|HTR1A(48.000)	1621|DBH(48.000)	1814|DRD3(48.000)	240|ALOX5(48.000)	1816|DRD5(48.000)	1812|DRD1(48.000)	6530|SLC6A2(48.000)	6323|SCN1A(23.000)	6328|SCN3A(23.000)	8091|HMGA2(22.373)	8654|PDE5A(22.373)	336|APOA2(22.373)	60482|SLC5A7(22.373)	10507|SEMA4D(22.373)	3084|NRG1(22.373)
Alloimperatorin	ID:933 From TCMID database	1429|CRYZ(23.000)	79001|VKORC1(23.000)	1728|NQO1(23.000)	148|ADRA1A(8.253)	2104|ESRRG(8.253)	2100|ESR2(8.253)	150|ADRA2A(8.253)	2099|ESR1(8.253)	1269|CNR2(8.253)	146|ADRA1D(8.253)	1268|CNR1(8.253)	147|ADRA1B(8.253)	152|ADRA2C(8.253)	151|ADRA2B(8.253)	9946|CRYZL1(5.859)	84869|CBR4(5.859)	127|ADH4(5.859)	154807|VKORC1L1(5.859)	9540|TP53I3(5.859)	5139|PDE3A(3.351)	10280|SIGMAR1(3.351)	4986|OPRK1(3.351)	4988|OPRM1(3.351)	6286|S100P(2.608)	3778|KCNMA1(2.608)	|(2.394)	57573|ZNF471(2.394)	8563|THOC5(2.394)	8434|RECK(2.394)	10309|CCNO(2.394)	7652|ZNF99(2.394)	80176|SPSB1(2.394)	386678|KRTAP10-11(2.394)	1387|CREBBP(2.394)	55854|ZC3H15(2.394)	150275|CCDC117(2.394)	79572|ATP13A3(2.394)	1785|DNM2(2.394)	2634|GBP2(2.394)	8419|BFSP2(2.394)	83548|COG3(2.394)	9363|RAB33A(2.394)	51599|LSR(2.394)	152926|PPM1K(2.394)	401409|RAB19(2.394)	79618|HMBOX1(2.394)	4893|NRAS(2.394)	347517|RAB41(2.394)
Imperatorin	ID:10999 From TCMID database	4790|NFKB1(15.365)	10800|CYSLTR1(15.365)	7124|TNF(15.365)	6037|RNASE3(15.365)	4583|MUC2(15.365)	3567|IL5(15.365)	148|ADRA1A(8.253)	5141|PDE4A(8.253)	5139|PDE3A(8.253)	150|ADRA2A(8.253)	81033|KCNH6(8.253)	1269|CNR2(8.253)	146|ADRA1D(8.253)	775|CACNA1C(8.253)	1268|CNR1(8.253)	3757|KCNH2(8.253)	1787|TRDMT1(8.253)	200895|DHFRL1(8.253)	1719|DHFR(8.253)	147|ADRA1B(8.253)	10846|PDE10A(8.253)	5138|PDE2A(8.253)	90134|KCNH7(8.253)	151|ADRA2B(8.253)	7298|TYMS(8.253)	811|CALR(3.351)	7153|TOP2A(3.351)	3356|HTR2A(3.351)	1131|CHRM3(3.351)	4835|NQO2(3.351)	4543|MTNR1A(3.351)	1128|CHRM1(3.351)	3357|HTR2B(3.351)	2099|ESR1(3.351)	4544|MTNR1B(3.351)	3362|HTR6(3.351)	438|ASMT(3.351)	810|CALML3(3.351)	4353|MPO(3.351)	3358|HTR2C(3.351)	1813|DRD2(3.351)	1133|CHRM5(3.351)	6532|SLC6A4(3.351)	59340|HRH4(3.351)	3269|HRH1(3.351)	3274|HRH2(3.351)	3350|HTR1A(3.351)	152|ADRA2C(3.351)
Beta-Pinene	ID:23545 From TCMID database	3750|KCND1(80.882)	3738|KCNA3(80.882)	5564|PRKAB1(80.882)	124|ADH1A(80.882)	3744|KCNA10(80.882)	2593|GAMT(80.882)	3748|KCNC3(80.882)	3736|KCNA1(80.882)	3737|KCNA2(80.882)	7173|TPO(80.882)	847|CAT(80.882)	3745|KCNB1(80.882)	125|ADH1B(80.882)	1742|DLG4(80.882)	3747|KCNC2(80.882)	3746|KCNC1(80.882)	126|ADH1C(80.882)	9312|KCNB2(80.882)	3741|KCNA5(80.882)	6035|RNASE1(80.882)	3751|KCND2(80.882)	217|ALDH2(80.882)	3739|KCNA4(80.882)	3743|KCNA7(80.882)	3742|KCNA6(80.882)	3752|KCND3(80.882)	2983|GUCY1B3(55.444)	2628|GATM(55.444)	50801|KCNK4(55.444)	389434|IYD(55.444)	3784|KCNQ1(55.444)	2203|FBP1(22.373)	9162|DGKI(22.373)	131|ADH7(22.373)	4781|NFIB(22.373)	114757|CYGB(22.373)	9369|NRXN3(22.373)	94030|LRRC4B(22.373)	343|AQP8(22.373)	170302|ARX(22.373)	3479|IGF1(22.373)	85358|SHANK3(22.373)	91703|ACY3(22.373)	443|ASPA(22.373)	9378|NRXN1(22.373)	1906|EDN1(22.373)	5020|OXT(22.373)	9863|MAGI2(22.373)
N-Nonane	ID:15674 From TCMID database	162514|TRPV3(5.785)	2903|GRIN2A(5.785)	1813|DRD2(5.785)	4986|OPRK1(5.785)	2904|GRIN2B(5.785)	116443|GRIN3A(5.785)	3359|HTR3A(5.785)	79054|TRPM8(5.785)	2902|GRIN1(5.785)	8989|TRPA1(5.785)	11280|SCN11A(2.608)	6327|SCN2B(2.608)	18|ABAT(2.608)	6323|SCN1A(2.608)	55800|SCN3B(2.608)	6328|SCN3A(2.608)	6332|SCN7A(2.608)	6331|SCN5A(2.608)	6336|SCN10A(2.608)	6718|AKR1D1(2.608)	7915|ALDH5A1(2.608)	6326|SCN2A(2.608)	9734|HDAC9(2.608)	7299|TYR(2.608)	6335|SCN9A(2.608)	43|ACHE(2.608)	6571|SLC18A2(2.608)	6329|SCN4A(2.608)	6330|SCN4B(2.608)	1135|CHRNA2(2.608)	6716|SRD5A2(2.608)	36|ACADSB(2.608)	6334|SCN8A(2.608)	6324|SCN1B(2.608)	4967|OGDH(2.608)	134864|TAAR1(2.608)	3066|HDAC2(2.608)	|(2.394)	57573|ZNF471(2.394)	8563|THOC5(2.394)	8434|RECK(2.394)	10309|CCNO(2.394)	7652|ZNF99(2.394)	80176|SPSB1(2.394)	386678|KRTAP10-11(2.394)	1387|CREBBP(2.394)	55854|ZC3H15(2.394)	150275|CCDC117(2.394)
Paeonol	ID:16521 From TCMID database	6646|SOAT1(23.000)	4547|MTTP(23.000)	1269|CNR2(23.000)	1268|CNR1(23.000)	8435|SOAT2(23.000)	1813|DRD2(22.373)	5074|PAWR(22.373)	2099|ESR1(15.365)	2677|GGCX(15.365)	7299|TYR(15.365)	5742|PTGS1(15.365)	5743|PTGS2(15.365)	266629|SEC14L3(8.253)	5139|PDE3A(8.253)	2100|ESR2(8.253)	4985|OPRD1(8.253)	5515|PPP2CA(8.253)	4986|OPRK1(8.253)	5578|PRKCA(8.253)	4988|OPRM1(8.253)	8856|NR1I2(8.253)	3292|HSD17B1(8.253)	240|ALOX5(8.253)	5516|PPP2CB(8.253)	23541|SEC14L2(8.253)	1606|DGKA(8.253)	5579|PRKCB(8.253)	284904|SEC14L4(8.253)	207|AKT1(5.859)	948|CD36(5.859)	1236|CCR7(5.859)	57406|ABHD6(5.859)	11343|MGLL(5.859)	2207|FCER1G(5.859)	7341|SUMO1(5.859)	350|APOH(5.859)	9290|GPR55(5.859)	1141|CHRNB2(5.859)	1071|CETP(5.859)	2205|FCER1A(5.859)	859|CAV3(5.859)	388591|RNF207(5.859)	718|C3(5.859)	747|DAGLA(5.859)	440503|PLIN5(5.859)	7784|ZP3(5.859)	6531|SLC6A3(5.785)	6257|RXRB(5.785)
Neocapillene	ID:15346 From TCMID database	|(2.394)	57573|ZNF471(2.394)	8563|THOC5(2.394)	8434|RECK(2.394)	10309|CCNO(2.394)	7652|ZNF99(2.394)	80176|SPSB1(2.394)	386678|KRTAP10-11(2.394)	1387|CREBBP(2.394)	55854|ZC3H15(2.394)	150275|CCDC117(2.394)	79572|ATP13A3(2.394)	2634|GBP2(2.394)	1785|DNM2(2.394)	8419|BFSP2(2.394)	83548|COG3(2.394)	9363|RAB33A(2.394)	51599|LSR(2.394)	152926|PPM1K(2.394)	79618|HMBOX1(2.394)	401409|RAB19(2.394)	4893|NRAS(2.394)	347517|RAB41(2.394)	84071|ARMC2(2.394)	6531|SLC6A3(2.394)	7022|TFAP2C(2.394)	1244|ABCC2(2.394)	1638|DCT(2.394)	25953|PNKD(2.394)	374403|TBC1D10C(2.394)	1969|EPHA2(2.394)	339263|C17orf51(2.394)	112812|FDX1L(2.394)	2203|FBP1(2.394)	85290|KRTAP4-3(2.394)	4358|MPV17(2.394)	337879|KRTAP8-1(2.394)	91373|UAP1L1(2.394)	114836|SLAMF6(2.394)	101060321|LOC101060321(2.394)	79805|VASH2(2.394)	84275|SLC25A33(2.394)	23788|MTCH2(2.394)	10233|LRRC23(2.394)	4836|NMT1(2.394)	56971|CEACAM19(2.394)	167465|ZNF366(2.394)	388667|C1orf137(2.394)
Camphor	ID:3048 From TCMID database	2104|ESRRG(48.000)	1345|COX6C(48.000)	1329|COX5B(48.000)	1350|COX7C(48.000)	4512|COX1(48.000)	1646|AKR1C2(48.000)	9377|COX5A(48.000)	4514|COX3(48.000)	367|AR(48.000)	1346|COX7A1(48.000)	2235|FECH(48.000)	1327|COX4I1(48.000)	5319|PLA2G1B(48.000)	1339|COX6A2(48.000)	126|ADH1C(48.000)	1340|COX6B1(48.000)	2172|FABP6(48.000)	1066|CES1(48.000)	1349|COX7B(48.000)	4513|COX2(48.000)	1351|COX8A(48.000)	9971|NR1H4(48.000)	27115|PDE7B(8.253)	8654|PDE5A(8.253)	5152|PDE9A(8.253)	5141|PDE4A(8.253)	6261|RYR1(8.253)	1586|CYP17A1(8.253)	2555|GABRA2(8.253)	2563|GABRD(8.253)	5139|PDE3A(8.253)	1137|CHRNA4(8.253)	2560|GABRB1(8.253)	9900|SV2A(8.253)	135|ADORA2A(8.253)	3708|ITPR1(8.253)	5145|PDE6A(8.253)	2567|GABRG3(8.253)	5591|PRKDC(8.253)	5293|PIK3CD(8.253)	2099|ESR1(8.253)	116444|GRIN3B(8.253)	5140|PDE3B(8.253)	5226|PGD(8.253)	1139|CHRNA7(8.253)	2903|GRIN2A(8.253)	5740|PTGIS(8.253)	5290|PIK3CA(8.253)
7-Demethylsuberosin	ID:5097 From TCMID database	1429|CRYZ(48.000)	79001|VKORC1(48.000)	1728|NQO1(48.000)	148|ADRA1A(8.253)	2104|ESRRG(8.253)	2100|ESR2(8.253)	150|ADRA2A(8.253)	2099|ESR1(8.253)	1269|CNR2(8.253)	146|ADRA1D(8.253)	1268|CNR1(8.253)	147|ADRA1B(8.253)	152|ADRA2C(8.253)	151|ADRA2B(8.253)	9946|CRYZL1(5.859)	84869|CBR4(5.859)	127|ADH4(5.859)	154807|VKORC1L1(5.859)	9540|TP53I3(5.859)	5139|PDE3A(3.351)	10280|SIGMAR1(3.351)	4986|OPRK1(3.351)	4988|OPRM1(3.351)	4790|NFKB1(2.608)	2555|GABRA2(2.608)	2563|GABRD(2.608)	2560|GABRB1(2.608)	2246|FGF1(2.608)	2567|GABRG3(2.608)	6284|S100A13(2.608)	10800|CYSLTR1(2.608)	7124|TNF(2.608)	2564|GABRE(2.608)	6326|SCN2A(2.608)	2556|GABRA3(2.608)	2565|GABRG1(2.608)	6037|RNASE3(2.608)	2568|GABRP(2.608)	6283|S100A12(2.608)	2557|GABRA4(2.608)	2561|GABRB2(2.608)	4583|MUC2(2.608)	3567|IL5(2.608)	6329|SCN4A(2.608)	55879|GABRQ(2.608)	6286|S100P(2.608)	2562|GABRB3(2.608)	2558|GABRA5(2.608)
Lauric Acid, Methyl Ester	ID:23627 From TCMID database	4881|NPR1(80.882)	11280|SCN11A(48.000)	6327|SCN2B(48.000)	18|ABAT(48.000)	6323|SCN1A(48.000)	2104|ESRRG(48.000)	55800|SCN3B(48.000)	1345|COX6C(48.000)	1329|COX5B(48.000)	1350|COX7C(48.000)	4512|COX1(48.000)	6328|SCN3A(48.000)	1646|AKR1C2(48.000)	6332|SCN7A(48.000)	6331|SCN5A(48.000)	6336|SCN10A(48.000)	6718|AKR1D1(48.000)	7915|ALDH5A1(48.000)	6326|SCN2A(48.000)	9377|COX5A(48.000)	4514|COX3(48.000)	367|AR(48.000)	1346|COX7A1(48.000)	2235|FECH(48.000)	1327|COX4I1(48.000)	9734|HDAC9(48.000)	5319|PLA2G1B(48.000)	1339|COX6A2(48.000)	7299|TYR(48.000)	6335|SCN9A(48.000)	6329|SCN4A(48.000)	6330|SCN4B(48.000)	126|ADH1C(48.000)	1340|COX6B1(48.000)	2172|FABP6(48.000)	1066|CES1(48.000)	6716|SRD5A2(48.000)	36|ACADSB(48.000)	6334|SCN8A(48.000)	1349|COX7B(48.000)	6324|SCN1B(48.000)	4513|COX2(48.000)	4967|OGDH(48.000)	3066|HDAC2(48.000)	1351|COX8A(48.000)	9971|NR1H4(48.000)	4883|NPR3(22.373)	4882|NPR2(22.373)
Phenethyl Alcohol	ID:25159 From TCMID database	8654|PDE5A(80.882)	5141|PDE4A(80.882)	10846|PDE10A(80.882)	100|ADA(80.882)	55846|ITFG2(55.444)	1716|DGUOK(55.444)	7498|XDH(55.444)	134|ADORA1(55.444)	5327|PLAT(48.000)	7056|THBD(48.000)	5468|PPARG(48.000)	596|BCL2(48.000)	2169|FABP2(48.000)	1080|CFTR(48.000)	5742|PTGS1(48.000)	5743|PTGS2(48.000)	5152|PDE9A(22.373)	4521|NUDT1(22.373)	972|CD74(22.373)	2987|GUK1(22.373)	5139|PDE3A(22.373)	22933|SIRT2(22.373)	4282|MIF(22.373)	6900|CNTN2(22.373)	1806|DPYD(22.373)	8741|TNFSF13(22.373)	132|ADK(22.373)	3704|ITPA(22.373)	5294|PIK3CG(22.373)	5631|PRPS1(22.373)	51816|CECR1(22.373)	8915|BCL10(22.373)	156|ADRBK1(22.373)	4860|PNP(22.373)	353|APRT(22.373)	6790|AURKA(22.373)	51738|GHRL(22.373)	1813|DRD2(22.373)	5153|PDE1B(22.373)	25939|SAMHD1(22.373)	51071|DERA(22.373)	10673|TNFSF13B(22.373)	1392|CRH(22.373)	477|ATP1A2(22.373)	115650|TNFRSF13C(22.373)	487|ATP2A1(22.373)	161823|ADAL(22.373)	55|ACPP(22.373)
Undecene	ID:22204 From TCMID database	3750|KCND1(80.882)	3738|KCNA3(80.882)	5564|PRKAB1(80.882)	124|ADH1A(80.882)	3744|KCNA10(80.882)	2593|GAMT(80.882)	3748|KCNC3(80.882)	3736|KCNA1(80.882)	3737|KCNA2(80.882)	7173|TPO(80.882)	847|CAT(80.882)	3745|KCNB1(80.882)	125|ADH1B(80.882)	1742|DLG4(80.882)	3747|KCNC2(80.882)	3746|KCNC1(80.882)	126|ADH1C(80.882)	9312|KCNB2(80.882)	3741|KCNA5(80.882)	6035|RNASE1(80.882)	3751|KCND2(80.882)	217|ALDH2(80.882)	3739|KCNA4(80.882)	3743|KCNA7(80.882)	3742|KCNA6(80.882)	3752|KCND3(80.882)	2983|GUCY1B3(55.444)	2628|GATM(55.444)	50801|KCNK4(55.444)	389434|IYD(55.444)	3784|KCNQ1(55.444)	2203|FBP1(22.373)	9162|DGKI(22.373)	131|ADH7(22.373)	4781|NFIB(22.373)	114757|CYGB(22.373)	9369|NRXN3(22.373)	94030|LRRC4B(22.373)	343|AQP8(22.373)	170302|ARX(22.373)	3479|IGF1(22.373)	85358|SHANK3(22.373)	91703|ACY3(22.373)	443|ASPA(22.373)	9378|NRXN1(22.373)	1906|EDN1(22.373)	5020|OXT(22.373)	9863|MAGI2(22.373)
Nodakenin	ID:15638 From TCMID database	135|ADORA2A(8.253)	136|ADORA2B(8.253)	140|ADORA3(8.253)	134|ADORA1(8.253)	4985|OPRD1(5.785)	79001|VKORC1(5.785)	4986|OPRK1(5.785)	4988|OPRM1(5.785)	1244|ABCC2(3.351)	2203|FBP1(3.351)	207|AKT1(3.351)	5564|PRKAB1(3.351)	10381|TUBB3(3.351)	90|ACVR1(3.351)	439|ASNA1(3.351)	157|ADRBK2(3.351)	55902|ACSS2(3.351)	7153|TOP2A(3.351)	1962|EHHADH(3.351)	94|ACVRL1(3.351)	107|ADCY1(3.351)	22978|NT5C2(3.351)	269|AMHR2(3.351)	10188|TNK2(3.351)	51807|TUBA8(3.351)	203068|TUBB(3.351)	440|ASNS(3.351)	132|ADK(3.351)	27|ABL2(3.351)	10382|TUBB4A(3.351)	112714|TUBA3E(3.351)	156|ADRBK1(3.351)	84617|TUBB6(3.351)	5144|PDE4D(3.351)	347688|TUBB8(3.351)	4023|LPL(3.351)	347733|TUBB2B(3.351)	6524|SLC5A2(3.351)	5562|PRKAA1(3.351)	10383|TUBB4B(3.351)	10060|ABCC9(3.351)	1385|CREB1(3.351)	84532|ACSS1(3.351)	7278|TUBA3C(3.351)	5292|PIM1(3.351)	5836|PYGL(3.351)	25|ABL1(3.351)	10939|AFG3L2(3.351)
Umbelliprenin	ID:22180 From TCMID database	4790|NFKB1(15.365)	10800|CYSLTR1(15.365)	7124|TNF(15.365)	6037|RNASE3(15.365)	4583|MUC2(15.365)	3567|IL5(15.365)	148|ADRA1A(8.253)	5141|PDE4A(8.253)	5139|PDE3A(8.253)	150|ADRA2A(8.253)	81033|KCNH6(8.253)	1269|CNR2(8.253)	146|ADRA1D(8.253)	775|CACNA1C(8.253)	1268|CNR1(8.253)	3757|KCNH2(8.253)	1787|TRDMT1(8.253)	200895|DHFRL1(8.253)	1719|DHFR(8.253)	147|ADRA1B(8.253)	10846|PDE10A(8.253)	5138|PDE2A(8.253)	90134|KCNH7(8.253)	151|ADRA2B(8.253)	7298|TYMS(8.253)	79001|VKORC1(5.785)	811|CALR(3.351)	7153|TOP2A(3.351)	3356|HTR2A(3.351)	1131|CHRM3(3.351)	4835|NQO2(3.351)	4543|MTNR1A(3.351)	1128|CHRM1(3.351)	3357|HTR2B(3.351)	2099|ESR1(3.351)	4544|MTNR1B(3.351)	3362|HTR6(3.351)	438|ASMT(3.351)	810|CALML3(3.351)	4353|MPO(3.351)	3358|HTR2C(3.351)	1813|DRD2(3.351)	1133|CHRM5(3.351)	6532|SLC6A4(3.351)	59340|HRH4(3.351)	3269|HRH1(3.351)	3274|HRH2(3.351)	3350|HTR1A(3.351)
Neobyakangelicol	ID:15340 From TCMID database	1244|ABCC2(8.253)	2203|FBP1(8.253)	207|AKT1(8.253)	1146|CHRNG(8.253)	3775|KCNK1(8.253)	5564|PRKAB1(8.253)	90|ACVR1(8.253)	439|ASNA1(8.253)	157|ADRBK2(8.253)	55902|ACSS2(8.253)	1137|CHRNA4(8.253)	1142|CHRNB3(8.253)	94|ACVRL1(8.253)	107|ADCY1(8.253)	4985|OPRD1(8.253)	22978|NT5C2(8.253)	269|AMHR2(8.253)	10188|TNK2(8.253)	440|ASNS(8.253)	132|ADK(8.253)	27|ABL2(8.253)	1139|CHRNA7(8.253)	6331|SCN5A(8.253)	156|ADRBK1(8.253)	1134|CHRNA1(8.253)	5144|PDE4D(8.253)	57053|CHRNA10(8.253)	4986|OPRK1(8.253)	1136|CHRNA3(8.253)	1141|CHRNB2(8.253)	4988|OPRM1(8.253)	43|ACHE(8.253)	3757|KCNH2(8.253)	5562|PRKAA1(8.253)	1145|CHRNE(8.253)	10060|ABCC9(8.253)	1385|CREB1(8.253)	1135|CHRNA2(8.253)	84532|ACSS1(8.253)	5292|PIM1(8.253)	8973|CHRNA6(8.253)	5836|PYGL(8.253)	2815|GP9(8.253)	25|ABL1(8.253)	10939|AFG3L2(8.253)	3783|KCNN4(8.253)	6286|S100P(8.253)	65061|CDK15(8.253)
Trans-Caryophyllene	ID:23150 From TCMID database	3750|KCND1(80.882)	3738|KCNA3(80.882)	5564|PRKAB1(80.882)	124|ADH1A(80.882)	3744|KCNA10(80.882)	2593|GAMT(80.882)	3748|KCNC3(80.882)	3736|KCNA1(80.882)	3737|KCNA2(80.882)	7173|TPO(80.882)	847|CAT(80.882)	3745|KCNB1(80.882)	125|ADH1B(80.882)	1742|DLG4(80.882)	3747|KCNC2(80.882)	3746|KCNC1(80.882)	126|ADH1C(80.882)	9312|KCNB2(80.882)	3741|KCNA5(80.882)	6035|RNASE1(80.882)	3751|KCND2(80.882)	217|ALDH2(80.882)	3739|KCNA4(80.882)	3743|KCNA7(80.882)	3742|KCNA6(80.882)	3752|KCND3(80.882)	2983|GUCY1B3(55.444)	2628|GATM(55.444)	50801|KCNK4(55.444)	389434|IYD(55.444)	3784|KCNQ1(55.444)	2203|FBP1(22.373)	9162|DGKI(22.373)	131|ADH7(22.373)	4781|NFIB(22.373)	114757|CYGB(22.373)	9369|NRXN3(22.373)	94030|LRRC4B(22.373)	343|AQP8(22.373)	170302|ARX(22.373)	3479|IGF1(22.373)	85358|SHANK3(22.373)	91703|ACY3(22.373)	443|ASPA(22.373)	9378|NRXN1(22.373)	1906|EDN1(22.373)	5020|OXT(22.373)	9863|MAGI2(22.373)
Demethylteuicausine	ID:30856 From TCMID database	3764|KCNJ8(15.365)	3768|KCNJ12(15.365)	3356|HTR2A(15.365)	3357|HTR2B(15.365)	150|ADRA2A(15.365)	3351|HTR1B(15.365)	3767|KCNJ11(15.365)	3614|IMPDH1(15.365)	3772|KCNJ15(15.365)	10280|SIGMAR1(15.365)	3358|HTR2C(15.365)	3352|HTR1D(15.365)	1813|DRD2(15.365)	4986|OPRK1(15.365)	4988|OPRM1(15.365)	3766|KCNJ10(15.365)	3350|HTR1A(15.365)	152|ADRA2C(15.365)	1814|DRD3(15.365)	3615|IMPDH2(15.365)	3758|KCNJ1(15.365)	151|ADRA2B(15.365)	3770|KCNJ14(15.365)	6531|SLC6A3(8.253)	11280|SCN11A(8.253)	781|CACNA2D1(8.253)	6529|SLC6A1(8.253)	148|ADRA1A(8.253)	1131|CHRM3(8.253)	51174|TUBD1(8.253)	1128|CHRM1(8.253)	4985|OPRD1(8.253)	203068|TUBB(8.253)	27175|TUBG2(8.253)	2903|GRIN2A(8.253)	10382|TUBB4A(8.253)	6331|SCN5A(8.253)	6336|SCN10A(8.253)	112714|TUBA3E(8.253)	7150|TOP1(8.253)	51175|TUBE1(8.253)	5136|PDE1A(8.253)	6570|SLC18A1(8.253)	146|ADRA1D(8.253)	347733|TUBB2B(8.253)	5153|PDE1B(8.253)	3725|JUN(8.253)	775|CACNA1C(8.253)
Nerolidol	ID:23421 From TCMID database	2099|ESR1(80.882)	5241|PGR(80.882)	54361|WNT4(55.444)	7022|TFAP2C(22.373)	8600|TNFSF11(22.373)	5245|PHB(22.373)	27324|TOX3(22.373)	7040|TGFB1(22.373)	5469|MED1(22.373)	4824|NKX3-1(22.373)	2100|ESR2(22.373)	4734|NEDD4(22.373)	6469|SHH(22.373)	6317|SERPINB3(22.373)	51176|LEF1(22.373)	2263|FGFR2(22.373)	6714|SRC(22.373)	51366|UBR5(22.373)	374|AREG(22.373)	947|CD34(22.373)	2852|GPER1(22.373)	7474|WNT5A(22.373)	6662|SOX9(22.373)	5155|PDGFB(22.373)	7421|VDR(22.373)	8805|TRIM24(22.373)	2555|GABRA2(8.253)	2563|GABRD(8.253)	2560|GABRB1(8.253)	2567|GABRG3(8.253)	2564|GABRE(8.253)	2556|GABRA3(8.253)	2565|GABRG1(8.253)	367|AR(8.253)	2568|GABRP(8.253)	2557|GABRA4(8.253)	2561|GABRB2(8.253)	55879|GABRQ(8.253)	2562|GABRB3(8.253)	2558|GABRA5(8.253)	2559|GABRA6(8.253)	2554|GABRA1(8.253)	2566|GABRG2(8.253)	29842|TFCP2L1(5.859)	207|AKT1(5.859)	7494|XBP1(5.859)	23411|SIRT1(5.859)	4327|MMP19(5.859)
Acetoin	ID:111 From TCMID database	367|AR(80.882)	18|ABAT(48.000)	9120|SLC16A6(48.000)	23539|SLC16A8(48.000)	5091|PC(48.000)	6566|SLC16A1(48.000)	9194|SLC16A7(48.000)	5315|PKM(48.000)	5162|PDHB(48.000)	9121|SLC16A5(48.000)	6567|SLC16A2(48.000)	5313|PKLR(48.000)	9122|SLC16A4(48.000)	64902|AGXT2(48.000)	9123|SLC16A3(48.000)	2908|NR3C1(23.000)	476|ATP1A1(23.000)	1289|COL5A1(22.373)	27035|NOX1(22.373)	4824|NKX3-1(22.373)	6462|SHBG(22.373)	7042|TGFB2(22.373)	9970|NR1I3(22.373)	216|ALDH1A1(22.373)	706|TSPO(22.373)	6280|S100A9(22.373)	819|CAMLG(15.365)	478|ATP1A3(15.365)	5535|PPP3R2(15.365)	5478|PPIA(15.365)	477|ATP1A2(15.365)	10105|PPIF(15.365)	27115|PDE7B(8.253)	5141|PDE4A(8.253)	135|ADORA2A(8.253)	480|ATP1A4(8.253)	5731|PTGER1(8.253)	645142|PPIAL4D(8.253)	5734|PTGER4(8.253)	5144|PDE4D(8.253)	730262|PPIAL4E(8.253)	653505|PPIAL4A(8.253)	5150|PDE7A(8.253)	5143|PDE4C(8.253)	5732|PTGER2(8.253)	653598|PPIAL4C(8.253)	5733|PTGER3(8.253)	5534|PPP3R1(8.253)
Myrcene	ID:15138 From TCMID database	3750|KCND1(80.882)	3738|KCNA3(80.882)	5564|PRKAB1(80.882)	124|ADH1A(80.882)	3744|KCNA10(80.882)	2593|GAMT(80.882)	3748|KCNC3(80.882)	3736|KCNA1(80.882)	3737|KCNA2(80.882)	7173|TPO(80.882)	847|CAT(80.882)	3745|KCNB1(80.882)	125|ADH1B(80.882)	1742|DLG4(80.882)	3747|KCNC2(80.882)	3746|KCNC1(80.882)	126|ADH1C(80.882)	9312|KCNB2(80.882)	3741|KCNA5(80.882)	6035|RNASE1(80.882)	3751|KCND2(80.882)	217|ALDH2(80.882)	3739|KCNA4(80.882)	3743|KCNA7(80.882)	3742|KCNA6(80.882)	3752|KCND3(80.882)	2983|GUCY1B3(55.444)	2628|GATM(55.444)	50801|KCNK4(55.444)	389434|IYD(55.444)	3784|KCNQ1(55.444)	2203|FBP1(22.373)	9162|DGKI(22.373)	131|ADH7(22.373)	4781|NFIB(22.373)	114757|CYGB(22.373)	9369|NRXN3(22.373)	94030|LRRC4B(22.373)	343|AQP8(22.373)	170302|ARX(22.373)	3479|IGF1(22.373)	85358|SHANK3(22.373)	91703|ACY3(22.373)	443|ASPA(22.373)	9378|NRXN1(22.373)	1906|EDN1(22.373)	5020|OXT(22.373)	9863|MAGI2(22.373)
2,3-Butanediol	ID:23614 From TCMID database	162514|TRPV3(15.365)	4986|OPRK1(15.365)	79054|TRPM8(15.365)	8989|TRPA1(15.365)	2100|ESR2(8.253)	2099|ESR1(8.253)	7054|TH(8.253)	7166|TPH1(8.253)	5053|PAH(8.253)	4846|NOS3(8.253)	782|CACNB1(5.785)	2893|GRIA4(5.785)	2555|GABRA2(5.785)	10369|CACNG2(5.785)	2563|GABRD(5.785)	1137|CHRNA4(5.785)	1142|CHRNB3(5.785)	2560|GABRB1(5.785)	2890|GRIA1(5.785)	2742|GLRA2(5.785)	3760|KCNJ3(5.785)	2567|GABRG3(5.785)	7412|VCAM1(5.785)	1139|CHRNA7(5.785)	3763|KCNJ6(5.785)	2564|GABRE(5.785)	2556|GABRA3(5.785)	2030|SLC29A1(5.785)	779|CACNA1S(5.785)	2565|GABRG1(5.785)	2568|GABRP(5.785)	57053|CHRNA10(5.785)	2891|GRIA2(5.785)	2557|GABRA4(5.785)	1136|CHRNA3(5.785)	2561|GABRB2(5.785)	775|CACNA1C(5.785)	1141|CHRNB2(5.785)	776|CACNA1D(5.785)	200909|HTR3D(5.785)	55879|GABRQ(5.785)	1135|CHRNA2(5.785)	8973|CHRNA6(5.785)	2562|GABRB3(5.785)	3762|KCNJ5(5.785)	116443|GRIN3A(5.785)	9177|HTR3B(5.785)	2892|GRIA3(5.785)
Oxyphyllacinol	ID:16450 From TCMID database	1131|CHRM3(48.000)	2100|ESR2(48.000)	4985|OPRD1(48.000)	2099|ESR1(48.000)	3358|HTR2C(48.000)	4986|OPRK1(48.000)	6532|SLC6A4(48.000)	4988|OPRM1(48.000)	8856|NR1I2(48.000)	240|ALOX5(48.000)	116443|GRIN3A(48.000)	6530|SLC6A2(48.000)	759|CA1(15.365)	7299|TYR(15.365)	266629|SEC14L3(8.253)	5515|PPP2CA(8.253)	4023|LPL(8.253)	64805|P2RY12(8.253)	5739|PTGIR(8.253)	5578|PRKCA(8.253)	5467|PPARD(8.253)	5516|PPP2CB(8.253)	23541|SEC14L2(8.253)	1606|DGKA(8.253)	5579|PRKCB(8.253)	284904|SEC14L4(8.253)	6531|SLC6A3(5.785)	6257|RXRB(5.785)	782|CACNB1(5.785)	1535|CYBA(5.785)	148|ADRA1A(5.785)	2104|ESRRG(5.785)	2555|GABRA2(5.785)	7153|TOP2A(5.785)	778|CACNA1F(5.785)	3356|HTR2A(5.785)	4130|MAP1A(5.785)	2563|GABRD(5.785)	53637|S1PR5(5.785)	1137|CHRNA4(5.785)	5880|RAC2(5.785)	154|ADRB2(5.785)	6646|SOAT1(5.785)	2560|GABRB1(5.785)	4543|MTNR1A(5.785)	5879|RAC1(5.785)	2567|GABRG3(5.785)	4547|MTTP(5.785)
Octadecanol	ID:15940 From TCMID database	162514|TRPV3(122.778)	4986|OPRK1(122.778)	79054|TRPM8(122.778)	8989|TRPA1(122.778)	50801|KCNK4(55.444)	11280|SCN11A(48.000)	6327|SCN2B(48.000)	18|ABAT(48.000)	6323|SCN1A(48.000)	55800|SCN3B(48.000)	6328|SCN3A(48.000)	6332|SCN7A(48.000)	6331|SCN5A(48.000)	6336|SCN10A(48.000)	6718|AKR1D1(48.000)	7915|ALDH5A1(48.000)	6326|SCN2A(48.000)	9734|HDAC9(48.000)	7299|TYR(48.000)	6335|SCN9A(48.000)	6329|SCN4A(48.000)	6330|SCN4B(48.000)	6716|SRD5A2(48.000)	36|ACADSB(48.000)	6334|SCN8A(48.000)	6324|SCN1B(48.000)	4967|OGDH(48.000)	3066|HDAC2(48.000)	89|ACTN3(22.373)	6863|TAC1(22.373)	4804|NGFR(22.373)	150|ADRA2A(22.373)	7442|TRPV1(22.373)	2255|FGF10(22.373)	7415|VCP(22.373)	3091|HIF1A(22.373)	664|BNIP3(22.373)	1392|CRH(22.373)	4747|NEFL(22.373)	90226|UCN2(22.373)	6608|SMO(22.373)	6865|TACR2(22.373)	358|AQP1(22.373)	255061|TAC4(22.373)	1001|CDH3(22.373)	863|CBFA2T3(22.373)	4744|NEFH(22.373)	1395|CRHR2(22.373)
10-Undecenoic Acid	ID:32174 From TCMID database	6257|RXRB(80.882)	6546|SLC8A1(80.882)	2593|GAMT(80.882)	1159|CKMT1B(80.882)	5918|RARRES1(80.882)	190|NR0B1(80.882)	7442|TRPV1(80.882)	5916|RARG(80.882)	5468|PPARG(80.882)	2864|FFAR1(80.882)	1158|CKM(80.882)	5915|RARB(80.882)	6258|RXRG(80.882)	9415|FADS2(80.882)	3992|FADS1(80.882)	5467|PPARD(80.882)	6535|SLC6A8(80.882)	5742|PTGS1(80.882)	2182|ACSL4(80.882)	1160|CKMT2(80.882)	5743|PTGS2(80.882)	548596|CKMT1A(80.882)	6785|ELOVL4(80.882)	216|ALDH1A1(80.882)	5914|RARA(80.882)	1152|CKB(80.882)	9052|GPRC5A(80.882)	6256|RXRA(80.882)	8854|ALDH1A2(80.882)	2181|ACSL3(80.882)	336|APOA2(55.444)	218|ALDH3A1(55.444)	3553|IL1B(55.444)	7124|TNF(55.444)	6548|SLC9A1(55.444)	3596|IL13(55.444)	2628|GATM(55.444)	6309|SC5D(55.444)	387700|SLC16A12(55.444)	79888|LPCAT1(55.444)	85301|COL27A1(55.444)	8710|SERPINB7(55.444)	11280|SCN11A(48.000)	6327|SCN2B(48.000)	18|ABAT(48.000)	6323|SCN1A(48.000)	2104|ESRRG(48.000)	55800|SCN3B(48.000)
1-Methyl-2-[(Z)-6-Pentadecenyl]-4(1h)-Quinolone	ID:14649 From TCMID database	3360|HTR4(80.882)	2555|GABRA2(80.882)	5627|PROS1(80.882)	8858|PROZ(80.882)	552|AVPR1A(80.882)	4835|NQO2(80.882)	3351|HTR1B(80.882)	2556|GABRA3(80.882)	2155|F7(80.882)	2158|F9(80.882)	2677|GGCX(80.882)	2159|F10(80.882)	79001|VKORC1(80.882)	3725|JUN(80.882)	5624|PROC(80.882)	4988|OPRM1(80.882)	186|AGTR2(80.882)	632|BGLAP(80.882)	5742|PTGS1(80.882)	554|AVPR2(80.882)	3350|HTR1A(80.882)	5743|PTGS2(80.882)	3359|HTR3A(80.882)	2554|GABRA1(80.882)	1728|NQO1(80.882)	185|AGTR1(80.882)	154807|VKORC1L1(80.882)	2147|F2(80.882)	183|AGT(55.444)	84869|CBR4(55.444)	551|AVP(55.444)	5076|PAX2(55.444)	1601|DAB2(55.444)	4256|MGP(55.444)	2152|F3(55.444)	79971|WLS(55.444)	2850|GPR27(55.444)	8710|SERPINB7(55.444)	88|ACTN2(55.444)	57447|NDRG2(22.373)	5105|PCK1(22.373)	112|ADCY6(22.373)	10135|NAMPT(22.373)	28984|RGCC(22.373)	9200|HACD1(22.373)	1435|CSF1(22.373)	146433|IL34(22.373)	114897|C1QTNF1(22.373)
Bornyl Acetate	ID:2557 From TCMID database	367|AR(122.778)	4881|NPR1(80.882)	4883|NPR3(22.373)	4882|NPR2(22.373)	6336|SCN10A(8.253)	43|ACHE(8.253)	590|BCHE(8.253)	2979|GUCA1B(5.859)	6863|TAC1(5.859)	3827|KNG1(5.859)	2788|GNG7(5.859)	552|AVPR1A(5.859)	135|ADORA2A(5.859)	1906|EDN1(5.859)	5020|OXT(5.859)	2986|GUCY2F(5.859)	2983|GUCY1B3(5.859)	4987|OPRL1(5.859)	7021|TFAP2B(5.859)	183|AGT(5.859)	4880|NPPC(5.859)	2984|GUCY2C(5.859)	2977|GUCY1A2(5.859)	1813|DRD2(5.859)	3037|HAS2(5.859)	51763|INPP5K(5.859)	685|BTC(5.859)	186|AGTR2(5.859)	3000|GUCY2D(5.859)	5733|PTGER3(5.859)	1814|DRD3(5.859)	8692|HYAL2(5.859)	4878|NPPA(5.859)	79849|PDZD3(5.859)	2982|GUCY1A3(5.859)	4879|NPPB(5.859)	11280|SCN11A(5.785)	6327|SCN2B(5.785)	781|CACNA2D1(5.785)	18|ABAT(5.785)	6323|SCN1A(5.785)	2104|ESRRG(5.785)	55800|SCN3B(5.785)	1345|COX6C(5.785)	1329|COX5B(5.785)	1350|COX7C(5.785)	4512|COX1(5.785)	1131|CHRM3(5.785)
[truncated: 206 more columns]

## Sheet: salvia miltiorrhiza
Miltionone Ii	ID:14855 From TCMID database	2099|ESR1(15.365)	79001|VKORC1(15.365)	6646|SOAT1(8.253)	4547|MTTP(8.253)	1269|CNR2(8.253)	2356|FPGS(8.253)	1268|CNR1(8.253)	3292|HSD17B1(8.253)	8435|SOAT2(8.253)	7298|TYMS(8.253)	5621|PRNP(5.785)	23569|PADI4(5.785)	552|AVPR1A(3.351)	4985|OPRD1(3.351)	1312|COMT(3.351)	116444|GRIN3B(3.351)	2903|GRIN2A(3.351)	57053|CHRNA10(3.351)	4986|OPRK1(3.351)	4988|OPRM1(3.351)	2905|GRIN2C(3.351)	2904|GRIN2B(3.351)	1080|CFTR(3.351)	554|AVPR2(3.351)	116443|GRIN3A(3.351)	2906|GRIN2D(3.351)	553|AVPR1B(3.351)	2902|GRIN1(3.351)	6257|RXRB(2.608)	27115|PDE7B(2.608)	6271|S100A1(2.608)	5141|PDE4A(2.608)	3859|KRT12(2.608)	5627|PROS1(2.608)	7153|TOP2A(2.608)	8858|PROZ(2.608)	836|CASP3(2.608)	6347|CCL2(2.608)	54205|CYCS(2.608)	4835|NQO2(2.608)	567|B2M(2.608)	6284|S100A13(2.608)	203068|TUBB(2.608)	5226|PGD(2.608)	3553|IL1B(2.608)	1105|CHD1(2.608)	1723|DHODH(2.608)	4318|MMP9(2.608)
Protocatechuic Acid-3-Glucoside	ID:31848 From TCMID database	7153|TOP2A(5.785)	203068|TUBB(5.785)	6336|SCN10A(5.785)	759|CA1(5.785)	5465|PPARA(5.785)	7277|TUBA4A(5.785)	7155|TOP2B(5.785)	3980|LIG3(3.351)	2100|ESR2(3.351)	3978|LIG1(3.351)	2099|ESR1(3.351)	462|SERPINC1(3.351)	7150|TOP1(3.351)	3053|SERPIND1(3.351)	2159|F10(3.351)	5742|PTGS1(3.351)	476|ATP1A1(3.351)	5743|PTGS2(3.351)	4759|NEU2(3.351)	266629|SEC14L3(2.608)	6257|RXRB(2.608)	781|CACNA2D1(2.608)	5564|PRKAB1(2.608)	51422|PRKAG2(2.608)	4790|NFKB1(2.608)	148|ADRA1A(2.608)	1909|EDNRA(2.608)	6323|SCN1A(2.608)	7852|CXCR4(2.608)	2555|GABRA2(2.608)	3356|HTR2A(2.608)	2563|GABRD(2.608)	55244|SLC47A1(2.608)	1589|CYP21A2(2.608)	154|ADRB2(2.608)	6646|SOAT1(2.608)	2560|GABRB1(2.608)	1131|CHRM3(2.608)	2246|FGF1(2.608)	4792|NFKBIA(2.608)	2567|GABRG3(2.608)	4547|MTTP(2.608)	1576|CYP3A4(2.608)	7157|TP53(2.608)	1128|CHRM1(2.608)	4985|OPRD1(2.608)	150|ADRA2A(2.608)	3351|HTR1B(2.608)
Dihydrotanshinone I	ID:5721 From TCMID database	57053|CHRNA10(15.365)	8654|PDE5A(3.351)	3764|KCNJ8(3.351)	5740|PTGIS(3.351)	79001|VKORC1(3.351)	1584|CYP11B1(3.351)	5742|PTGS1(3.351)	5743|PTGS2(3.351)	1585|CYP11B2(3.351)	8913|CACNA1G(3.351)	50940|PDE11A(3.351)	6257|RXRB(2.608)	27115|PDE7B(2.608)	5141|PDE4A(2.608)	3859|KRT12(2.608)	5627|PROS1(2.608)	7153|TOP2A(2.608)	8858|PROZ(2.608)	836|CASP3(2.608)	6347|CCL2(2.608)	54205|CYCS(2.608)	4835|NQO2(2.608)	567|B2M(2.608)	2099|ESR1(2.608)	4133|MAP2(2.608)	5226|PGD(2.608)	3553|IL1B(2.608)	1105|CHD1(2.608)	1723|DHODH(2.608)	4318|MMP9(2.608)	2155|F7(2.608)	2158|F9(2.608)	3614|IMPDH1(2.608)	5144|PDE4D(2.608)	5241|PGR(2.608)	2677|GGCX(2.608)	367|AR(2.608)	596|BCL2(2.608)	2159|F10(2.608)	5624|PROC(2.608)	6258|RXRG(2.608)	5150|PDE7A(2.608)	8856|NR1I2(2.608)	3269|HRH1(2.608)	632|BGLAP(2.608)	5143|PDE4C(2.608)	4137|MAPT(2.608)	5621|PRNP(2.608)
Miltipolone	ID:14856 From TCMID database	1429|CRYZ(8.253)	79001|VKORC1(8.253)	1728|NQO1(8.253)	266629|SEC14L3(5.785)	7153|TOP2A(5.785)	154|ADRB2(5.785)	2100|ESR2(5.785)	4985|OPRD1(5.785)	203068|TUBB(5.785)	2099|ESR1(5.785)	5515|PPP2CA(5.785)	10280|SIGMAR1(5.785)	4986|OPRK1(5.785)	6524|SLC5A2(5.785)	5578|PRKCA(5.785)	4988|OPRM1(5.785)	8856|NR1I2(5.785)	240|ALOX5(5.785)	5516|PPP2CB(5.785)	23541|SEC14L2(5.785)	1606|DGKA(5.785)	5579|PRKCB(5.785)	7277|TUBA4A(5.785)	284904|SEC14L4(5.785)	7155|TOP2B(5.785)	6646|SOAT1(3.351)	4547|MTTP(3.351)	1269|CNR2(3.351)	4860|PNP(3.351)	1268|CNR1(3.351)	8435|SOAT2(3.351)	6531|SLC6A3(2.608)	6257|RXRB(2.608)	781|CACNA2D1(2.608)	1535|CYBA(2.608)	148|ADRA1A(2.608)	6323|SCN1A(2.608)	4130|MAP1A(2.608)	1137|CHRNA4(2.608)	5880|RAC2(2.608)	1131|CHRM3(2.608)	6122|RPL3(2.608)	4543|MTNR1A(2.608)	5879|RAC1(2.608)	1128|CHRM1(2.608)	7099|TLR4(2.608)	4689|NCF4(2.608)	150|ADRA2A(2.608)
Danshenol B	ID:4627 From TCMID database	1131|CHRM3(3.351)	1128|CHRM1(3.351)	4985|OPRD1(3.351)	5241|PGR(3.351)	367|AR(3.351)	2908|NR3C1(3.351)	4986|OPRK1(3.351)	4988|OPRM1(3.351)	5004|ORM1(3.351)	1129|CHRM2(3.351)	5005|ORM2(3.351)	1132|CHRM4(3.351)	6257|RXRB(2.608)	3859|KRT12(2.608)	7153|TOP2A(2.608)	836|CASP3(2.608)	6347|CCL2(2.608)	54205|CYCS(2.608)	567|B2M(2.608)	2099|ESR1(2.608)	3553|IL1B(2.608)	1105|CHD1(2.608)	1723|DHODH(2.608)	4318|MMP9(2.608)	2677|GGCX(2.608)	6258|RXRG(2.608)	632|BGLAP(2.608)	5621|PRNP(2.608)	7422|VEGFA(2.608)	3292|HSD17B1(2.608)	240|ALOX5(2.608)	23569|PADI4(2.608)	834|CASP1(2.608)	6256|RXRA(2.608)	2798|GNRHR(2.608)	7155|TOP2B(2.608)	|(2.394)	57573|ZNF471(2.394)	8563|THOC5(2.394)	8434|RECK(2.394)	10309|CCNO(2.394)	7652|ZNF99(2.394)	80176|SPSB1(2.394)	386678|KRTAP10-11(2.394)	1387|CREBBP(2.394)	55854|ZC3H15(2.394)	150275|CCDC117(2.394)	79572|ATP13A3(2.394)
Tanshiquinone B	ID:31949 From TCMID database	8600|TNFSF11(80.882)	4790|NFKB1(80.882)	2555|GABRA2(80.882)	2563|GABRD(80.882)	1137|CHRNA4(80.882)	2560|GABRB1(80.882)	2567|GABRG3(80.882)	116444|GRIN3B(80.882)	7124|TNF(80.882)	1139|CHRNA7(80.882)	2903|GRIN2A(80.882)	1583|CYP11A1(80.882)	6331|SCN5A(80.882)	2564|GABRE(80.882)	2556|GABRA3(80.882)	2565|GABRG1(80.882)	2263|FGFR2(80.882)	2568|GABRP(80.882)	2891|GRIA2(80.882)	1003|CDH5(80.882)	2557|GABRA4(80.882)	2561|GABRB2(80.882)	2905|GRIN2C(80.882)	2904|GRIN2B(80.882)	55879|GABRQ(80.882)	5742|PTGS1(80.882)	5004|ORM1(80.882)	5743|PTGS2(80.882)	2562|GABRB3(80.882)	116443|GRIN3A(80.882)	2558|GABRA5(80.882)	2559|GABRA6(80.882)	2554|GABRA1(80.882)	2566|GABRG2(80.882)	2906|GRIN2D(80.882)	89832|CHRFAM7A(80.882)	51185|CRBN(80.882)	1588|CYP19A1(80.882)	5005|ORM2(80.882)	2898|GRIK2(80.882)	2902|GRIN1(80.882)	2255|FGF10(55.444)	51176|LEF1(55.444)	8862|APLN(55.444)	8792|TNFRSF11A(55.444)	8626|TP63(55.444)	147|ADRA1B(55.444)	2260|FGFR1(55.444)
Miltirone	ID:14857 From TCMID database	3360|HTR4(80.882)	2555|GABRA2(80.882)	5627|PROS1(80.882)	8858|PROZ(80.882)	552|AVPR1A(80.882)	4835|NQO2(80.882)	3351|HTR1B(80.882)	2556|GABRA3(80.882)	2155|F7(80.882)	2158|F9(80.882)	2677|GGCX(80.882)	2159|F10(80.882)	79001|VKORC1(80.882)	3725|JUN(80.882)	5624|PROC(80.882)	4988|OPRM1(80.882)	186|AGTR2(80.882)	632|BGLAP(80.882)	5742|PTGS1(80.882)	554|AVPR2(80.882)	3350|HTR1A(80.882)	5743|PTGS2(80.882)	3359|HTR3A(80.882)	2554|GABRA1(80.882)	1728|NQO1(80.882)	185|AGTR1(80.882)	154807|VKORC1L1(80.882)	2147|F2(80.882)	183|AGT(55.444)	84869|CBR4(55.444)	551|AVP(55.444)	5076|PAX2(55.444)	1601|DAB2(55.444)	4256|MGP(55.444)	2152|F3(55.444)	79971|WLS(55.444)	2850|GPR27(55.444)	8710|SERPINB7(55.444)	88|ACTN2(55.444)	57447|NDRG2(22.373)	5105|PCK1(22.373)	112|ADCY6(22.373)	10135|NAMPT(22.373)	28984|RGCC(22.373)	9200|HACD1(22.373)	1435|CSF1(22.373)	146433|IL34(22.373)	114897|C1QTNF1(22.373)
Isocucurbitacin D	ID:11352 From TCMID database	6715|SRD5A1(48.000)	2099|ESR1(48.000)	5731|PTGER1(48.000)	5734|PTGER4(48.000)	5241|PGR(48.000)	367|AR(48.000)	2908|NR3C1(48.000)	5739|PTGIR(48.000)	5732|PTGER2(48.000)	5733|PTGER3(48.000)	5737|PTGFR(48.000)	3290|HSD11B1(48.000)	301|ANXA1(48.000)	476|ATP1A1(23.000)	338442|HCAR2(22.373)	4853|NOTCH2(22.373)	55909|BIN3(22.373)	84083|ZRANB3(22.373)	819|CAMLG(15.365)	478|ATP1A3(15.365)	5535|PPP3R2(15.365)	5478|PPIA(15.365)	477|ATP1A2(15.365)	10105|PPIF(15.365)	7421|VDR(15.365)	27115|PDE7B(8.253)	5141|PDE4A(8.253)	135|ADORA2A(8.253)	5618|PRLR(8.253)	480|ATP1A4(8.253)	190|NR0B1(8.253)	645142|PPIAL4D(8.253)	4843|NOS2(8.253)	5144|PDE4D(8.253)	730262|PPIAL4E(8.253)	653505|PPIAL4A(8.253)	5578|PRKCA(8.253)	5150|PDE7A(8.253)	5143|PDE4C(8.253)	653598|PPIAL4C(8.253)	5534|PPP3R1(8.253)	728945|PPIAL4F(8.253)	5142|PDE4B(8.253)	134|ADORA1(8.253)	5580|PRKCD(8.253)	4306|NR3C2(8.253)	1289|COL5A1(5.859)	27035|NOX1(5.859)
Baicalin	ID:2106 From TCMID database	6286|S100P(5.785)	3778|KCNMA1(5.785)	7153|TOP2A(3.351)	7155|TOP2B(3.351)	4790|NFKB1(2.608)	55244|SLC47A1(2.608)	1576|CYP3A4(2.608)	1128|CHRM1(2.608)	10800|CYSLTR1(2.608)	203068|TUBB(2.608)	1269|CNR2(2.608)	7124|TNF(2.608)	1105|CHD1(2.608)	1595|CYP51A1(2.608)	6037|RNASE3(2.608)	4583|MUC2(2.608)	3567|IL5(2.608)	1268|CNR1(2.608)	3757|KCNH2(2.608)	1636|ACE(2.608)	4311|MME(2.608)	2862|MLNR(2.608)	28234|SLCO1B3(2.608)	7277|TUBA4A(2.608)	213|ALB(2.608)	1129|CHRM2(2.608)	5243|ABCB1(2.608)	10599|SLCO1B1(2.608)	|(2.394)	57573|ZNF471(2.394)	8563|THOC5(2.394)	8434|RECK(2.394)	10309|CCNO(2.394)	7652|ZNF99(2.394)	80176|SPSB1(2.394)	386678|KRTAP10-11(2.394)	1387|CREBBP(2.394)	55854|ZC3H15(2.394)	150275|CCDC117(2.394)	79572|ATP13A3(2.394)	1785|DNM2(2.394)	2634|GBP2(2.394)	8419|BFSP2(2.394)	83548|COG3(2.394)	9363|RAB33A(2.394)	51599|LSR(2.394)	152926|PPM1K(2.394)	401409|RAB19(2.394)
Tigogenin	ID:21367 From TCMID database	2246|FGF1(8.253)	2249|FGF4(8.253)	2247|FGF2(8.253)	7852|CXCR4(5.785)	2555|GABRA2(5.785)	2563|GABRD(5.785)	55244|SLC47A1(5.785)	2560|GABRB1(5.785)	2567|GABRG3(5.785)	1576|CYP3A4(5.785)	4791|NFKB2(5.785)	7124|TNF(5.785)	2564|GABRE(5.785)	759|CA1(5.785)	4318|MMP9(5.785)	2556|GABRA3(5.785)	1595|CYP51A1(5.785)	2565|GABRG1(5.785)	367|AR(5.785)	2568|GABRP(5.785)	2557|GABRA4(5.785)	2561|GABRB2(5.785)	3458|IFNG(5.785)	3757|KCNH2(5.785)	55879|GABRQ(5.785)	1719|DHFR(5.785)	476|ATP1A1(5.785)	2562|GABRB3(5.785)	2558|GABRA5(5.785)	1181|CLCN2(5.785)	2559|GABRA6(5.785)	2554|GABRA1(5.785)	2862|MLNR(5.785)	2566|GABRG2(5.785)	760|CA2(5.785)	4036|LRP2(5.785)	213|ALB(5.785)	5243|ABCB1(5.785)	162514|TRPV3(3.351)	6331|SCN5A(3.351)	2908|NR3C1(3.351)	4986|OPRK1(3.351)	79054|TRPM8(3.351)	8989|TRPA1(3.351)	781|CACNA2D1(2.608)	6323|SCN1A(2.608)	2104|ESRRG(2.608)	1345|COX6C(2.608)
Neotigogenin	ID:15454 From TCMID database	2246|FGF1(8.253)	2249|FGF4(8.253)	2247|FGF2(8.253)	7852|CXCR4(5.785)	2555|GABRA2(5.785)	2563|GABRD(5.785)	55244|SLC47A1(5.785)	2560|GABRB1(5.785)	2567|GABRG3(5.785)	1576|CYP3A4(5.785)	4791|NFKB2(5.785)	7124|TNF(5.785)	2564|GABRE(5.785)	759|CA1(5.785)	4318|MMP9(5.785)	2556|GABRA3(5.785)	1595|CYP51A1(5.785)	2565|GABRG1(5.785)	367|AR(5.785)	2568|GABRP(5.785)	2557|GABRA4(5.785)	2561|GABRB2(5.785)	3458|IFNG(5.785)	3757|KCNH2(5.785)	55879|GABRQ(5.785)	1719|DHFR(5.785)	476|ATP1A1(5.785)	2562|GABRB3(5.785)	2558|GABRA5(5.785)	1181|CLCN2(5.785)	2559|GABRA6(5.785)	2554|GABRA1(5.785)	2862|MLNR(5.785)	2566|GABRG2(5.785)	760|CA2(5.785)	4036|LRP2(5.785)	213|ALB(5.785)	5243|ABCB1(5.785)	162514|TRPV3(3.351)	6331|SCN5A(3.351)	2908|NR3C1(3.351)	4986|OPRK1(3.351)	79054|TRPM8(3.351)	8989|TRPA1(3.351)	781|CACNA2D1(2.608)	6323|SCN1A(2.608)	2104|ESRRG(2.608)	1345|COX6C(2.608)
Isotanshinone I	ID:11726 From TCMID database	2246|FGF1(8.253)	6284|S100A13(8.253)	6283|S100A12(8.253)	3562|IL3(8.253)	782|CACNB1(5.785)	8912|CACNA1H(5.785)	148|ADRA1A(5.785)	6323|SCN1A(5.785)	778|CACNA1F(5.785)	150|ADRA2A(5.785)	9254|CACNA2D2(5.785)	3776|KCNK2(5.785)	779|CACNA1S(5.785)	153|ADRB1(5.785)	785|CACNB4(5.785)	146|ADRA1D(5.785)	775|CACNA1C(5.785)	776|CACNA1D(5.785)	784|CACNB3(5.785)	3757|KCNH2(5.785)	147|ADRA1B(5.785)	152|ADRA2C(5.785)	783|CACNB2(5.785)	151|ADRA2B(5.785)	328|APEX1(3.351)	7153|TOP2A(3.351)	7150|TOP1(3.351)	57053|CHRNA10(3.351)	79001|VKORC1(3.351)	6257|RXRB(2.608)	1429|CRYZ(2.608)	6258|RXRG(2.608)	1728|NQO1(2.608)	6256|RXRA(2.608)	|(2.394)	57573|ZNF471(2.394)	8563|THOC5(2.394)	8434|RECK(2.394)	10309|CCNO(2.394)	7652|ZNF99(2.394)	80176|SPSB1(2.394)	386678|KRTAP10-11(2.394)	1387|CREBBP(2.394)	55854|ZC3H15(2.394)	150275|CCDC117(2.394)	79572|ATP13A3(2.394)	1785|DNM2(2.394)	2634|GBP2(2.394)
Monomethyl Lithospermate	ID:14919 From TCMID database	3614|IMPDH1(23.000)	3615|IMPDH2(23.000)	1269|CNR2(8.253)	1268|CNR1(8.253)	3251|HPRT1(5.859)	8833|GMPS(5.859)	6646|SOAT1(5.785)	4547|MTTP(5.785)	4985|OPRD1(5.785)	7099|TLR4(5.785)	2099|ESR1(5.785)	4986|OPRK1(5.785)	4988|OPRM1(5.785)	1385|CREB1(5.785)	5004|ORM1(5.785)	8435|SOAT2(5.785)	5005|ORM2(5.785)	266629|SEC14L3(3.351)	6257|RXRB(3.351)	1131|CHRM3(3.351)	5916|RARG(3.351)	5515|PPP2CA(3.351)	5915|RARB(3.351)	6258|RXRG(3.351)	3458|IFNG(3.351)	5578|PRKCA(3.351)	8856|NR1I2(3.351)	1135|CHRNA2(3.351)	5742|PTGS1(3.351)	7172|TPMT(3.351)	5743|PTGS2(3.351)	240|ALOX5(3.351)	5516|PPP2CB(3.351)	5947|RBP1(3.351)	23541|SEC14L2(3.351)	1606|DGKA(3.351)	5579|PRKCB(3.351)	5914|RARA(3.351)	590|BCHE(3.351)	1129|CHRM2(3.351)	6256|RXRA(3.351)	284904|SEC14L4(3.351)	1146|CHRNG(2.608)	6271|S100A1(2.608)	148|ADRA1A(2.608)	5141|PDE4A(2.608)	3859|KRT12(2.608)	7153|TOP2A(2.608)
Salonitenolide	ID:19179 From TCMID database	5578|PRKCA(48.000)	3156|HMGCR(48.000)	5580|PRKCD(48.000)	3689|ITGB2(23.000)	3683|ITGAL(23.000)	3066|HDAC2(23.000)	3065|HDAC1(15.365)	8284|KDM5D(15.365)	221120|ALKBH3(15.365)	79676|OGFOD2(15.365)	10536|P3H3(15.365)	55217|TMLHE(15.365)	54681|P4HTM(15.365)	5351|PLOD1(15.365)	112398|EGLN2(15.365)	121642|ALKBH2(15.365)	8424|BBOX1(15.365)	5066|PAM(15.365)	9963|SLC23A1(15.365)	55239|OGFOD1(15.365)	1621|DBH(15.365)	112399|EGLN3(15.365)	476|ATP1A1(15.365)	8985|PLOD3(15.365)	5033|P4HA1(15.365)	54583|EGLN1(15.365)	55214|P3H2(15.365)	3938|LCT(15.365)	5352|PLOD2(15.365)	64175|P3H1(15.365)	5264|PHYH(15.365)	478|ATP1A3(8.253)	8242|KDM5C(8.253)	8001|GLRA3(8.253)	2475|MTOR(8.253)	477|ATP1A2(8.253)	2562|GABRB3(8.253)	1785|DNM2(5.859)	4058|LTK(5.859)	23411|SIRT1(5.859)	6495|SIX1(5.859)	51804|SIX4(5.859)	6688|SPI1(5.859)	7320|UBE2B(5.859)	3958|LGALS3(5.859)	7157|TP53(5.859)	815|CAMK2A(5.859)	3965|LGALS9(5.859)
Magnesium Lithospermate B	ID:13363 From TCMID database	3614|IMPDH1(23.000)	3615|IMPDH2(23.000)	1269|CNR2(8.253)	1268|CNR1(8.253)	3251|HPRT1(5.859)	8833|GMPS(5.859)	6646|SOAT1(5.785)	4547|MTTP(5.785)	4985|OPRD1(5.785)	7099|TLR4(5.785)	2099|ESR1(5.785)	4986|OPRK1(5.785)	4988|OPRM1(5.785)	1385|CREB1(5.785)	5004|ORM1(5.785)	8435|SOAT2(5.785)	5005|ORM2(5.785)	266629|SEC14L3(3.351)	6257|RXRB(3.351)	1131|CHRM3(3.351)	5916|RARG(3.351)	5515|PPP2CA(3.351)	5915|RARB(3.351)	6258|RXRG(3.351)	3458|IFNG(3.351)	5578|PRKCA(3.351)	8856|NR1I2(3.351)	1135|CHRNA2(3.351)	5742|PTGS1(3.351)	7172|TPMT(3.351)	5743|PTGS2(3.351)	240|ALOX5(3.351)	5516|PPP2CB(3.351)	5947|RBP1(3.351)	23541|SEC14L2(3.351)	1606|DGKA(3.351)	5579|PRKCB(3.351)	5914|RARA(3.351)	590|BCHE(3.351)	1129|CHRM2(3.351)	6256|RXRA(3.351)	284904|SEC14L4(3.351)	1146|CHRNG(2.608)	6271|S100A1(2.608)	148|ADRA1A(2.608)	3859|KRT12(2.608)	7153|TOP2A(2.608)	1137|CHRNA4(2.608)
Miltionone I	ID:14854 From TCMID database	8600|TNFSF11(80.882)	4790|NFKB1(80.882)	2555|GABRA2(80.882)	2563|GABRD(80.882)	1137|CHRNA4(80.882)	2560|GABRB1(80.882)	2567|GABRG3(80.882)	116444|GRIN3B(80.882)	7124|TNF(80.882)	1139|CHRNA7(80.882)	2903|GRIN2A(80.882)	1583|CYP11A1(80.882)	6331|SCN5A(80.882)	2564|GABRE(80.882)	2556|GABRA3(80.882)	2565|GABRG1(80.882)	2263|FGFR2(80.882)	2568|GABRP(80.882)	2891|GRIA2(80.882)	1003|CDH5(80.882)	2557|GABRA4(80.882)	2561|GABRB2(80.882)	2905|GRIN2C(80.882)	2904|GRIN2B(80.882)	55879|GABRQ(80.882)	5742|PTGS1(80.882)	5004|ORM1(80.882)	5743|PTGS2(80.882)	2562|GABRB3(80.882)	116443|GRIN3A(80.882)	2558|GABRA5(80.882)	2559|GABRA6(80.882)	2554|GABRA1(80.882)	2566|GABRG2(80.882)	2906|GRIN2D(80.882)	89832|CHRFAM7A(80.882)	51185|CRBN(80.882)	1588|CYP19A1(80.882)	5005|ORM2(80.882)	2898|GRIK2(80.882)	2902|GRIN1(80.882)	2255|FGF10(55.444)	51176|LEF1(55.444)	8862|APLN(55.444)	8792|TNFRSF11A(55.444)	8626|TP63(55.444)	147|ADRA1B(55.444)	2260|FGFR1(55.444)
Lithospermic Acid	ID:23254 From TCMID database	3614|IMPDH1(23.000)	3615|IMPDH2(23.000)	1269|CNR2(8.253)	1268|CNR1(8.253)	3251|HPRT1(5.859)	8833|GMPS(5.859)	6646|SOAT1(5.785)	4547|MTTP(5.785)	4985|OPRD1(5.785)	7099|TLR4(5.785)	2099|ESR1(5.785)	4986|OPRK1(5.785)	4988|OPRM1(5.785)	1385|CREB1(5.785)	5004|ORM1(5.785)	8435|SOAT2(5.785)	5005|ORM2(5.785)	266629|SEC14L3(3.351)	6257|RXRB(3.351)	1131|CHRM3(3.351)	5916|RARG(3.351)	5515|PPP2CA(3.351)	5915|RARB(3.351)	6258|RXRG(3.351)	3458|IFNG(3.351)	5578|PRKCA(3.351)	8856|NR1I2(3.351)	1135|CHRNA2(3.351)	5742|PTGS1(3.351)	7172|TPMT(3.351)	5743|PTGS2(3.351)	240|ALOX5(3.351)	5516|PPP2CB(3.351)	5947|RBP1(3.351)	23541|SEC14L2(3.351)	1606|DGKA(3.351)	5579|PRKCB(3.351)	5914|RARA(3.351)	590|BCHE(3.351)	1129|CHRM2(3.351)	6256|RXRA(3.351)	284904|SEC14L4(3.351)	1146|CHRNG(2.608)	6271|S100A1(2.608)	148|ADRA1A(2.608)	5141|PDE4A(2.608)	3859|KRT12(2.608)	7153|TOP2A(2.608)
Tanshinaldehyde Ii	ID:25218 From TCMID database	57053|CHRNA10(15.365)	8654|PDE5A(3.351)	3764|KCNJ8(3.351)	5740|PTGIS(3.351)	79001|VKORC1(3.351)	1584|CYP11B1(3.351)	5742|PTGS1(3.351)	5743|PTGS2(3.351)	1585|CYP11B2(3.351)	8913|CACNA1G(3.351)	50940|PDE11A(3.351)	6257|RXRB(2.608)	782|CACNB1(2.608)	8912|CACNA1H(2.608)	148|ADRA1A(2.608)	6323|SCN1A(2.608)	778|CACNA1F(2.608)	1128|CHRM1(2.608)	150|ADRA2A(2.608)	9254|CACNA2D2(2.608)	3776|KCNK2(2.608)	779|CACNA1S(2.608)	153|ADRB1(2.608)	785|CACNB4(2.608)	146|ADRA1D(2.608)	6258|RXRG(2.608)	775|CACNA1C(2.608)	776|CACNA1D(2.608)	784|CACNB3(2.608)	3757|KCNH2(2.608)	147|ADRA1B(2.608)	152|ADRA2C(2.608)	783|CACNB2(2.608)	1129|CHRM2(2.608)	6256|RXRA(2.608)	151|ADRA2B(2.608)	|(2.394)	57573|ZNF471(2.394)	8563|THOC5(2.394)	8434|RECK(2.394)	10309|CCNO(2.394)	7652|ZNF99(2.394)	80176|SPSB1(2.394)	386678|KRTAP10-11(2.394)	1387|CREBBP(2.394)	55854|ZC3H15(2.394)	150275|CCDC117(2.394)	79572|ATP13A3(2.394)
Neotanshinone C	ID:25417 From TCMID database	8600|TNFSF11(80.882)	4790|NFKB1(80.882)	2555|GABRA2(80.882)	2563|GABRD(80.882)	1137|CHRNA4(80.882)	2560|GABRB1(80.882)	2567|GABRG3(80.882)	116444|GRIN3B(80.882)	7124|TNF(80.882)	1139|CHRNA7(80.882)	2903|GRIN2A(80.882)	1583|CYP11A1(80.882)	6331|SCN5A(80.882)	2564|GABRE(80.882)	2556|GABRA3(80.882)	2565|GABRG1(80.882)	2263|FGFR2(80.882)	2568|GABRP(80.882)	2891|GRIA2(80.882)	1003|CDH5(80.882)	2557|GABRA4(80.882)	2561|GABRB2(80.882)	2905|GRIN2C(80.882)	2904|GRIN2B(80.882)	55879|GABRQ(80.882)	5742|PTGS1(80.882)	5004|ORM1(80.882)	5743|PTGS2(80.882)	2562|GABRB3(80.882)	116443|GRIN3A(80.882)	2558|GABRA5(80.882)	2559|GABRA6(80.882)	2554|GABRA1(80.882)	2566|GABRG2(80.882)	2906|GRIN2D(80.882)	89832|CHRFAM7A(80.882)	51185|CRBN(80.882)	1588|CYP19A1(80.882)	5005|ORM2(80.882)	2898|GRIK2(80.882)	2902|GRIN1(80.882)	2255|FGF10(55.444)	51176|LEF1(55.444)	8862|APLN(55.444)	8792|TNFRSF11A(55.444)	8626|TP63(55.444)	147|ADRA1B(55.444)	2260|FGFR1(55.444)
Salvinone	ID:19203 From TCMID database	2099|ESR1(80.882)	2100|ESR2(48.000)	8856|NR1I2(48.000)	240|ALOX5(48.000)	3292|HSD17B1(23.000)	7022|TFAP2C(22.373)	27324|TOX3(22.373)	7040|TGFB1(22.373)	5469|MED1(22.373)	4824|NKX3-1(22.373)	6469|SHH(22.373)	51176|LEF1(22.373)	2263|FGFR2(22.373)	5241|PGR(22.373)	54361|WNT4(22.373)	374|AREG(22.373)	2852|GPER1(22.373)	7474|WNT5A(22.373)	6662|SOX9(22.373)	7421|VDR(22.373)	8805|TRIM24(22.373)	1312|COMT(15.365)	79001|VKORC1(15.365)	1080|CFTR(15.365)	6646|SOAT1(8.253)	4547|MTTP(8.253)	1269|CNR2(8.253)	5468|PPARG(8.253)	2356|FPGS(8.253)	1268|CNR1(8.253)	5742|PTGS1(8.253)	5743|PTGS2(8.253)	8435|SOAT2(8.253)	4352|MPL(8.253)	7298|TYMS(8.253)	8600|TNFSF11(5.859)	207|AKT1(5.859)	5728|PTEN(5.859)	3479|IGF1(5.859)	7476|WNT7A(5.859)	5618|PRLR(5.859)	3202|HOXA5(5.859)	3207|HOXA11(5.859)	7301|TYRO3(5.859)	658|BMPR1B(5.859)	3398|ID2(5.859)	3169|FOXA1(5.859)	93649|MYOCD(5.859)
Cryptoxanthin	ID:23741 From TCMID database	7421|VDR(122.778)	1594|CYP27B1(80.882)	2638|GC(55.444)	22938|SNW1(55.444)	51109|RDH11(48.000)	6257|RXRB(48.000)	5949|RBP3(48.000)	54884|RETSAT(48.000)	112724|RDH13(48.000)	9249|DHRS3(48.000)	5959|RDH5(48.000)	5918|RARRES1(48.000)	190|NR0B1(48.000)	2099|ESR1(48.000)	5916|RARG(48.000)	5241|PGR(48.000)	5915|RARB(48.000)	220|ALDH1A3(48.000)	6258|RXRG(48.000)	145226|RDH12(48.000)	10901|DHRS4(48.000)	5947|RBP1(48.000)	216|ALDH1A1(48.000)	6017|RLBP1(48.000)	57665|RDH14(48.000)	5914|RARA(48.000)	50700|RDH8(48.000)	9052|GPRC5A(48.000)	9227|LRAT(48.000)	6256|RXRA(48.000)	8854|ALDH1A2(48.000)	4790|NFKB1(22.373)	8644|AKR1C3(22.373)	1591|CYP24A1(22.373)	151306|GPBAR1(22.373)	6591|SNAI2(22.373)	5469|MED1(22.373)	6615|SNAI1(22.373)	1576|CYP3A4(22.373)	793|CALB1(22.373)	8074|FGF23(22.373)	2672|GFI1(22.373)	55915|LANCL2(22.373)	54361|WNT4(22.373)	6929|TCF3(22.373)	581|BAX(22.373)	9365|KL(22.373)	120227|CYP2R1(22.373)
Danshenxinkun A	ID:4631 From TCMID database	1131|CHRM3(23.000)	1128|CHRM1(23.000)	1129|CHRM2(23.000)	1132|CHRM4(23.000)	2798|GNRHR(15.365)	3973|LHCGR(8.253)	645|BLVRB(8.253)	55312|RFK(8.253)	10564|ARFGEF2(5.859)	80005|DOCK5(5.859)	4923|NTSR1(5.859)	54328|GPR173(5.859)	1133|CHRM5(5.859)	5023|P2RX1(5.859)	9732|DOCK4(5.859)	5604|MAP2K1(5.859)	5627|PROS1(5.785)	8858|PROZ(5.785)	4835|NQO2(5.785)	1723|DHODH(5.785)	2155|F7(5.785)	2158|F9(5.785)	2677|GGCX(5.785)	2159|F10(5.785)	79001|VKORC1(5.785)	5624|PROC(5.785)	632|BGLAP(5.785)	1728|NQO1(5.785)	154807|VKORC1L1(5.785)	2147|F2(5.785)	8600|TNFSF11(3.351)	8654|PDE5A(3.351)	4790|NFKB1(3.351)	5141|PDE4A(3.351)	819|CAMLG(3.351)	2555|GABRA2(3.351)	2563|GABRD(3.351)	1137|CHRNA4(3.351)	2560|GABRB1(3.351)	2567|GABRG3(3.351)	116444|GRIN3B(3.351)	8566|PDXK(3.351)	7124|TNF(3.351)	1139|CHRNA7(3.351)	2903|GRIN2A(3.351)	1583|CYP11A1(3.351)	6331|SCN5A(3.351)	2564|GABRE(3.351)
Dehydromiltirone	ID:4949 From TCMID database	3360|HTR4(80.882)	2555|GABRA2(80.882)	5627|PROS1(80.882)	8858|PROZ(80.882)	552|AVPR1A(80.882)	4835|NQO2(80.882)	3351|HTR1B(80.882)	2556|GABRA3(80.882)	2155|F7(80.882)	2158|F9(80.882)	2677|GGCX(80.882)	2159|F10(80.882)	79001|VKORC1(80.882)	3725|JUN(80.882)	5624|PROC(80.882)	4988|OPRM1(80.882)	186|AGTR2(80.882)	632|BGLAP(80.882)	5742|PTGS1(80.882)	554|AVPR2(80.882)	3350|HTR1A(80.882)	5743|PTGS2(80.882)	3359|HTR3A(80.882)	2554|GABRA1(80.882)	1728|NQO1(80.882)	185|AGTR1(80.882)	154807|VKORC1L1(80.882)	2147|F2(80.882)	183|AGT(55.444)	84869|CBR4(55.444)	551|AVP(55.444)	5076|PAX2(55.444)	1601|DAB2(55.444)	4256|MGP(55.444)	2152|F3(55.444)	79971|WLS(55.444)	2850|GPR27(55.444)	8710|SERPINB7(55.444)	88|ACTN2(55.444)	57447|NDRG2(22.373)	5105|PCK1(22.373)	112|ADCY6(22.373)	10135|NAMPT(22.373)	28984|RGCC(22.373)	9200|HACD1(22.373)	1435|CSF1(22.373)	146433|IL34(22.373)	114897|C1QTNF1(22.373)
Ferulic Acid	ID:23696 From TCMID database	6257|RXRB(15.365)	5916|RARG(15.365)	3614|IMPDH1(15.365)	5915|RARB(15.365)	6258|RXRG(15.365)	3458|IFNG(15.365)	7172|TPMT(15.365)	5947|RBP1(15.365)	5914|RARA(15.365)	3615|IMPDH2(15.365)	6256|RXRA(15.365)	30814|PLA2G2E(8.253)	1646|AKR1C2(8.253)	1269|CNR2(8.253)	5468|PPARG(8.253)	38|ACAT1(8.253)	4353|MPO(8.253)	5319|PLA2G1B(8.253)	1645|AKR1C1(8.253)	7299|TYR(8.253)	1268|CNR1(8.253)	5742|PTGS1(8.253)	5743|PTGS2(8.253)	23657|SLC7A11(8.253)	240|ALOX5(8.253)	3551|IKBKB(8.253)	1147|CHUK(8.253)	5465|PPARA(8.253)	6916|TBXAS1(8.253)	5581|PRKCE(5.785)	2104|ESRRG(5.785)	2100|ESR2(5.785)	10682|EBP(5.785)	2099|ESR1(5.785)	5578|PRKCA(5.785)	5588|PRKCQ(5.785)	5584|PRKCI(5.785)	5579|PRKCB(5.785)	5582|PRKCG(5.785)	5590|PRKCZ(5.785)	5580|PRKCD(5.785)	266629|SEC14L3(3.351)	8644|AKR1C3(3.351)	5515|PPP2CA(3.351)	64805|P2RY12(3.351)	5739|PTGIR(3.351)	8856|NR1I2(3.351)	5467|PPARD(3.351)
Ferruginol	ID:7763 From TCMID database	2100|ESR2(122.778)	2099|ESR1(122.778)	8856|NR1I2(122.778)	2555|GABRA2(80.882)	2563|GABRD(80.882)	5139|PDE3A(80.882)	2560|GABRB1(80.882)	2567|GABRG3(80.882)	7124|TNF(80.882)	2564|GABRE(80.882)	6326|SCN2A(80.882)	2556|GABRA3(80.882)	2565|GABRG1(80.882)	2568|GABRP(80.882)	2557|GABRA4(80.882)	2561|GABRB2(80.882)	43|ACHE(80.882)	6329|SCN4A(80.882)	55879|GABRQ(80.882)	2562|GABRB3(80.882)	2558|GABRA5(80.882)	2559|GABRA6(80.882)	2554|GABRA1(80.882)	5142|PDE4B(80.882)	590|BCHE(80.882)	2566|GABRG2(80.882)	5140|PDE3B(55.444)	5144|PDE4D(55.444)	8292|COLQ(55.444)	4049|LTA(55.444)	6256|RXRA(55.444)	4986|OPRK1(48.000)	4988|OPRM1(48.000)	240|ALOX5(48.000)	6323|SCN1A(23.000)	6328|SCN3A(23.000)	8091|HMGA2(22.373)	8654|PDE5A(22.373)	336|APOA2(22.373)	60482|SLC5A7(22.373)	10507|SEMA4D(22.373)	3084|NRG1(22.373)	972|CD74(22.373)	3263|HPX(22.373)	22933|SIRT2(22.373)	4282|MIF(22.373)	29958|DMGDH(22.373)	4824|NKX3-1(22.373)
Neocryptotanshinone	ID:15366 From TCMID database	1131|CHRM3(23.000)	1128|CHRM1(23.000)	1129|CHRM2(23.000)	1132|CHRM4(23.000)	2798|GNRHR(15.365)	3973|LHCGR(8.253)	645|BLVRB(8.253)	55312|RFK(8.253)	10564|ARFGEF2(5.859)	80005|DOCK5(5.859)	4923|NTSR1(5.859)	54328|GPR173(5.859)	1133|CHRM5(5.859)	5023|P2RX1(5.859)	9732|DOCK4(5.859)	5604|MAP2K1(5.859)	6257|RXRB(5.785)	5627|PROS1(5.785)	8858|PROZ(5.785)	4835|NQO2(5.785)	1723|DHODH(5.785)	2155|F7(5.785)	2158|F9(5.785)	2677|GGCX(5.785)	2159|F10(5.785)	79001|VKORC1(5.785)	5624|PROC(5.785)	6258|RXRG(5.785)	632|BGLAP(5.785)	1728|NQO1(5.785)	6256|RXRA(5.785)	154807|VKORC1L1(5.785)	2147|F2(5.785)	8600|TNFSF11(3.351)	8654|PDE5A(3.351)	4790|NFKB1(3.351)	5141|PDE4A(3.351)	819|CAMLG(3.351)	2555|GABRA2(3.351)	2563|GABRD(3.351)	1137|CHRNA4(3.351)	2560|GABRB1(3.351)	2567|GABRG3(3.351)	116444|GRIN3B(3.351)	8566|PDXK(3.351)	7124|TNF(3.351)	1139|CHRNA7(3.351)	2903|GRIN2A(3.351)
Danshensu	ID:4629 From TCMID database	148|ADRA1A(48.000)	154|ADRB2(48.000)	150|ADRA2A(48.000)	7054|TH(48.000)	153|ADRB1(48.000)	6898|TAT(48.000)	146|ADRA1D(48.000)	1813|DRD2(48.000)	5053|PAH(48.000)	1644|DDC(48.000)	1815|DRD4(48.000)	147|ADRA1B(48.000)	152|ADRA2C(48.000)	1814|DRD3(48.000)	240|ALOX5(48.000)	8565|YARS(48.000)	1816|DRD5(48.000)	1812|DRD1(48.000)	51067|YARS2(48.000)	155|ADRB3(48.000)	151|ADRA2B(48.000)	6531|SLC6A3(5.785)	781|CACNA2D1(5.785)	5327|PLAT(5.785)	2104|ESRRG(5.785)	2555|GABRA2(5.785)	5594|MAPK1(5.785)	2563|GABRD(5.785)	23428|SLC7A8(5.785)	2560|GABRB1(5.785)	1131|CHRM3(5.785)	2100|ESR2(5.785)	2567|GABRG3(5.785)	7056|THBD(5.785)	1128|CHRM1(5.785)	4985|OPRD1(5.785)	2099|ESR1(5.785)	116444|GRIN3B(5.785)	7124|TNF(5.785)	7173|TPO(5.785)	2903|GRIN2A(5.785)	5468|PPARG(5.785)	6336|SCN10A(5.785)	2564|GABRE(5.785)	8503|PIK3R3(5.785)	6326|SCN2A(5.785)	2556|GABRA3(5.785)	5295|PIK3R1(5.785)
Tanshinone Ii B	ID:23967 From TCMID database	2246|FGF1(8.253)	6284|S100A13(8.253)	6283|S100A12(8.253)	3562|IL3(8.253)	328|APEX1(3.351)	7153|TOP2A(3.351)	7150|TOP1(3.351)	57053|CHRNA10(3.351)	79001|VKORC1(3.351)	6257|RXRB(2.608)	782|CACNB1(2.608)	8912|CACNA1H(2.608)	148|ADRA1A(2.608)	6323|SCN1A(2.608)	778|CACNA1F(2.608)	1128|CHRM1(2.608)	150|ADRA2A(2.608)	5916|RARG(2.608)	9254|CACNA2D2(2.608)	3776|KCNK2(2.608)	779|CACNA1S(2.608)	153|ADRB1(2.608)	785|CACNB4(2.608)	146|ADRA1D(2.608)	5915|RARB(2.608)	6258|RXRG(2.608)	775|CACNA1C(2.608)	776|CACNA1D(2.608)	784|CACNB3(2.608)	3757|KCNH2(2.608)	147|ADRA1B(2.608)	152|ADRA2C(2.608)	5914|RARA(2.608)	783|CACNB2(2.608)	1129|CHRM2(2.608)	6256|RXRA(2.608)	151|ADRA2B(2.608)	|(2.328)	57573|ZNF471(2.328)	8563|THOC5(2.328)	8434|RECK(2.328)	10309|CCNO(2.328)	7652|ZNF99(2.328)	80176|SPSB1(2.328)	386678|KRTAP10-11(2.328)	1387|CREBBP(2.328)	55854|ZC3H15(2.328)	150275|CCDC117(2.328)
Salvigenin	ID:19196 From TCMID database	266629|SEC14L3(15.365)	6646|SOAT1(15.365)	4547|MTTP(15.365)	1269|CNR2(15.365)	5515|PPP2CA(15.365)	5578|PRKCA(15.365)	8856|NR1I2(15.365)	1268|CNR1(15.365)	240|ALOX5(15.365)	5516|PPP2CB(15.365)	23541|SEC14L2(15.365)	1606|DGKA(15.365)	5579|PRKCB(15.365)	8435|SOAT2(15.365)	284904|SEC14L4(15.365)	1429|CRYZ(8.253)	730005|SEC14L6(8.253)	79001|VKORC1(8.253)	7299|TYR(8.253)	1728|NQO1(8.253)	1813|DRD2(5.859)	5074|PAWR(5.859)	1128|CHRM1(5.785)	6286|S100P(5.785)	3778|KCNMA1(5.785)	1129|CHRM2(5.785)	10381|TUBB3(3.351)	4790|NFKB1(3.351)	2100|ESR2(3.351)	4985|OPRD1(3.351)	10800|CYSLTR1(3.351)	5531|PPP4C(3.351)	203068|TUBB(3.351)	2099|ESR1(3.351)	7124|TNF(3.351)	10382|TUBB4A(3.351)	84617|TUBB6(3.351)	6037|RNASE3(3.351)	347688|TUBB8(3.351)	347733|TUBB2B(3.351)	4986|OPRK1(3.351)	4583|MUC2(3.351)	3567|IL5(3.351)	4988|OPRM1(3.351)	10383|TUBB4B(3.351)	7280|TUBB2A(3.351)	5582|PRKCG(3.351)	81027|TUBB1(3.351)
Tanshindiol A	ID:20663 From TCMID database	1131|CHRM3(8.253)	1128|CHRM1(8.253)	1129|CHRM2(8.253)	1132|CHRM4(8.253)	27115|PDE7B(3.351)	5141|PDE4A(3.351)	135|ADORA2A(3.351)	22978|NT5C2(3.351)	132|ADK(3.351)	645|BLVRB(3.351)	3614|IMPDH1(3.351)	5144|PDE4D(3.351)	5241|PGR(3.351)	2908|NR3C1(3.351)	5578|PRKCA(3.351)	5150|PDE7A(3.351)	5143|PDE4C(3.351)	55312|RFK(3.351)	5167|ENPP1(3.351)	5142|PDE4B(3.351)	134|ADORA1(3.351)	3290|HSD11B1(3.351)	301|ANXA1(3.351)	5580|PRKCD(3.351)	6257|RXRB(2.608)	782|CACNB1(2.608)	8912|CACNA1H(2.608)	148|ADRA1A(2.608)	6323|SCN1A(2.608)	7153|TOP2A(2.608)	778|CACNA1F(2.608)	150|ADRA2A(2.608)	9254|CACNA2D2(2.608)	1105|CHD1(2.608)	3776|KCNK2(2.608)	779|CACNA1S(2.608)	153|ADRB1(2.608)	785|CACNB4(2.608)	146|ADRA1D(2.608)	6258|RXRG(2.608)	775|CACNA1C(2.608)	776|CACNA1D(2.608)	784|CACNB3(2.608)	3757|KCNH2(2.608)	147|ADRA1B(2.608)	152|ADRA2C(2.608)	783|CACNB2(2.608)	6256|RXRA(2.608)
Isocryptotanshinone	ID:11351 From TCMID database	1723|DHODH(48.000)	57053|CHRNA10(15.365)	5627|PROS1(5.785)	8858|PROZ(5.785)	4835|NQO2(5.785)	2155|F7(5.785)	2158|F9(5.785)	2677|GGCX(5.785)	2159|F10(5.785)	79001|VKORC1(5.785)	5624|PROC(5.785)	632|BGLAP(5.785)	3292|HSD17B1(5.785)	1728|NQO1(5.785)	154807|VKORC1L1(5.785)	2147|F2(5.785)	8654|PDE5A(3.351)	3764|KCNJ8(3.351)	5740|PTGIS(3.351)	1584|CYP11B1(3.351)	5742|PTGS1(3.351)	5743|PTGS2(3.351)	1585|CYP11B2(3.351)	8913|CACNA1G(3.351)	50940|PDE11A(3.351)	6257|RXRB(2.608)	5327|PLAT(2.608)	5141|PDE4A(2.608)	3859|KRT12(2.608)	7153|TOP2A(2.608)	836|CASP3(2.608)	54205|CYCS(2.608)	567|B2M(2.608)	4133|MAP2(2.608)	3553|IL1B(2.608)	1105|CHD1(2.608)	5731|PTGER1(2.608)	4318|MMP9(2.608)	5144|PDE4D(2.608)	367|AR(2.608)	596|BCL2(2.608)	5739|PTGIR(2.608)	6258|RXRG(2.608)	8856|NR1I2(2.608)	5143|PDE4C(2.608)	4137|MAPT(2.608)	5621|PRNP(2.608)	7422|VEGFA(2.608)
Salvianolic Acid A	ID:23238 From TCMID database	3458|IFNG(15.365)	5742|PTGS1(15.365)	7172|TPMT(15.365)	5743|PTGS2(15.365)	30814|PLA2G2E(8.253)	1646|AKR1C2(8.253)	5468|PPARG(8.253)	38|ACAT1(8.253)	4353|MPO(8.253)	5319|PLA2G1B(8.253)	1645|AKR1C1(8.253)	1644|DDC(8.253)	23657|SLC7A11(8.253)	240|ALOX5(8.253)	3551|IKBKB(8.253)	1147|CHUK(8.253)	6916|TBXAS1(8.253)	150|ADRA2A(5.785)	1813|DRD2(5.785)	1815|DRD4(5.785)	1814|DRD3(5.785)	1816|DRD5(5.785)	1812|DRD1(5.785)	8644|AKR1C3(3.351)	3614|IMPDH1(3.351)	1109|AKR1C4(3.351)	3615|IMPDH2(3.351)	4352|MPL(3.351)	6531|SLC6A3(2.608)	6257|RXRB(2.608)	782|CACNB1(2.608)	781|CACNA2D1(2.608)	5327|PLAT(2.608)	5581|PRKCE(2.608)	148|ADRA1A(2.608)	5141|PDE4A(2.608)	2104|ESRRG(2.608)	7153|TOP2A(2.608)	778|CACNA1F(2.608)	23428|SLC7A8(2.608)	154|ADRB2(2.608)	6646|SOAT1(2.608)	1131|CHRM3(2.608)	2100|ESR2(2.608)	6122|RPL3(2.608)	4547|MTTP(2.608)	1128|CHRM1(2.608)	4985|OPRD1(2.608)
Caffeicacid	ID:2887 From TCMID database	367|AR(26.373)	3458|IFNG(23.000)	7172|TPMT(23.000)	30814|PLA2G2E(15.365)	5468|PPARG(15.365)	38|ACAT1(15.365)	4353|MPO(15.365)	5319|PLA2G1B(15.365)	1645|AKR1C1(15.365)	1644|DDC(15.365)	5742|PTGS1(15.365)	5743|PTGS2(15.365)	23657|SLC7A11(15.365)	240|ALOX5(15.365)	3551|IKBKB(15.365)	1147|CHUK(15.365)	6916|TBXAS1(15.365)	8644|AKR1C3(8.253)	1646|AKR1C2(8.253)	1109|AKR1C4(8.253)	4352|MPL(8.253)	338442|HCAR2(5.859)	353376|TICAM2(5.859)	3965|LGALS9(5.859)	3553|IL1B(5.859)	7124|TNF(5.859)	100506658|OCLN(5.859)	4544|MTNR1B(5.859)	50943|FOXP3(5.859)	101|ADAM8(5.859)	1437|CSF2(5.859)	8320|EOMES(5.859)	9093|DNAJA3(5.859)	3569|IL6(5.859)	4615|MYD88(5.859)	4057|LTF(5.859)	8809|IL18R1(5.859)	8767|RIPK2(5.859)	301|ANXA1(5.859)	23765|IL17RA(5.859)	5074|PAWR(5.859)	3605|IL17A(5.859)	6257|RXRB(5.785)	2104|ESRRG(5.785)	2100|ESR2(5.785)	1312|COMT(5.785)	2099|ESR1(5.785)	5916|RARG(5.785)
Neocryptotanshinone Ii	ID:15367 From TCMID database	8600|TNFSF11(80.882)	4790|NFKB1(80.882)	2555|GABRA2(80.882)	2563|GABRD(80.882)	1137|CHRNA4(80.882)	2560|GABRB1(80.882)	2567|GABRG3(80.882)	116444|GRIN3B(80.882)	7124|TNF(80.882)	1139|CHRNA7(80.882)	2903|GRIN2A(80.882)	1583|CYP11A1(80.882)	6331|SCN5A(80.882)	2564|GABRE(80.882)	2556|GABRA3(80.882)	2565|GABRG1(80.882)	2263|FGFR2(80.882)	2568|GABRP(80.882)	2891|GRIA2(80.882)	1003|CDH5(80.882)	2557|GABRA4(80.882)	2561|GABRB2(80.882)	2905|GRIN2C(80.882)	2904|GRIN2B(80.882)	55879|GABRQ(80.882)	5742|PTGS1(80.882)	5004|ORM1(80.882)	5743|PTGS2(80.882)	2562|GABRB3(80.882)	116443|GRIN3A(80.882)	2558|GABRA5(80.882)	2559|GABRA6(80.882)	2554|GABRA1(80.882)	2566|GABRG2(80.882)	2906|GRIN2D(80.882)	89832|CHRFAM7A(80.882)	51185|CRBN(80.882)	1588|CYP19A1(80.882)	5005|ORM2(80.882)	2898|GRIK2(80.882)	2902|GRIN1(80.882)	2255|FGF10(55.444)	51176|LEF1(55.444)	8862|APLN(55.444)	8792|TNFRSF11A(55.444)	8626|TP63(55.444)	147|ADRA1B(55.444)	2260|FGFR1(55.444)
Nortanshinone	ID:15792 From TCMID database	57053|CHRNA10(15.365)	8654|PDE5A(3.351)	3764|KCNJ8(3.351)	5740|PTGIS(3.351)	79001|VKORC1(3.351)	1584|CYP11B1(3.351)	5742|PTGS1(3.351)	5743|PTGS2(3.351)	1585|CYP11B2(3.351)	8913|CACNA1G(3.351)	50940|PDE11A(3.351)	6257|RXRB(2.608)	782|CACNB1(2.608)	8912|CACNA1H(2.608)	148|ADRA1A(2.608)	6323|SCN1A(2.608)	778|CACNA1F(2.608)	1128|CHRM1(2.608)	150|ADRA2A(2.608)	9254|CACNA2D2(2.608)	3776|KCNK2(2.608)	779|CACNA1S(2.608)	153|ADRB1(2.608)	785|CACNB4(2.608)	146|ADRA1D(2.608)	6258|RXRG(2.608)	775|CACNA1C(2.608)	776|CACNA1D(2.608)	784|CACNB3(2.608)	3757|KCNH2(2.608)	147|ADRA1B(2.608)	152|ADRA2C(2.608)	783|CACNB2(2.608)	1129|CHRM2(2.608)	6256|RXRA(2.608)	151|ADRA2B(2.608)	|(2.394)	57573|ZNF471(2.394)	8563|THOC5(2.394)	8434|RECK(2.394)	10309|CCNO(2.394)	7652|ZNF99(2.394)	80176|SPSB1(2.394)	386678|KRTAP10-11(2.394)	1387|CREBBP(2.394)	55854|ZC3H15(2.394)	150275|CCDC117(2.394)	79572|ATP13A3(2.394)
Tanshinone I	ID:20669 From TCMID database	2246|FGF1(8.253)	6284|S100A13(8.253)	6283|S100A12(8.253)	3562|IL3(8.253)	328|APEX1(3.351)	7153|TOP2A(3.351)	7150|TOP1(3.351)	57053|CHRNA10(3.351)	79001|VKORC1(3.351)	6257|RXRB(2.608)	782|CACNB1(2.608)	8912|CACNA1H(2.608)	148|ADRA1A(2.608)	6323|SCN1A(2.608)	778|CACNA1F(2.608)	1128|CHRM1(2.608)	150|ADRA2A(2.608)	5916|RARG(2.608)	9254|CACNA2D2(2.608)	3776|KCNK2(2.608)	779|CACNA1S(2.608)	153|ADRB1(2.608)	785|CACNB4(2.608)	146|ADRA1D(2.608)	5915|RARB(2.608)	6258|RXRG(2.608)	775|CACNA1C(2.608)	776|CACNA1D(2.608)	784|CACNB3(2.608)	3757|KCNH2(2.608)	147|ADRA1B(2.608)	152|ADRA2C(2.608)	5914|RARA(2.608)	783|CACNB2(2.608)	1129|CHRM2(2.608)	6256|RXRA(2.608)	151|ADRA2B(2.608)	|(2.328)	57573|ZNF471(2.328)	8563|THOC5(2.328)	8434|RECK(2.328)	10309|CCNO(2.328)	7652|ZNF99(2.328)	80176|SPSB1(2.328)	386678|KRTAP10-11(2.328)	1387|CREBBP(2.328)	55854|ZC3H15(2.328)	150275|CCDC117(2.328)
Heteratisine	ID:9458 From TCMID database	1131|CHRM3(48.000)	1576|CYP3A4(48.000)	1128|CHRM1(48.000)	23569|PADI4(48.000)	1129|CHRM2(48.000)	5243|ABCB1(23.000)	1577|CYP3A5(15.365)	55244|SLC47A1(15.365)	1595|CYP51A1(15.365)	3757|KCNH2(15.365)	100861540|CYP3A7-CYP3A51P(15.365)	2862|MLNR(15.365)	1551|CYP3A7(15.365)	28234|SLCO1B3(15.365)	213|ALB(15.365)	10599|SLCO1B1(15.365)	51174|TUBD1(8.253)	203068|TUBB(8.253)	8001|GLRA3(8.253)	27175|TUBG2(8.253)	10382|TUBB4A(8.253)	112714|TUBA3E(8.253)	7150|TOP1(8.253)	51175|TUBE1(8.253)	64816|CYP3A43(8.253)	347733|TUBB2B(8.253)	3725|JUN(8.253)	1133|CHRM5(8.253)	10383|TUBB4B(8.253)	1135|CHRNA2(8.253)	7278|TUBA3C(8.253)	84790|TUBA1C(8.253)	2562|GABRB3(8.253)	6476|SI(8.253)	5244|ABCB4(8.253)	10376|TUBA1B(8.253)	3359|HTR3A(8.253)	116447|TOP1MT(8.253)	81027|TUBB1(8.253)	7277|TUBA4A(8.253)	1132|CHRM4(8.253)	7283|TUBG1(8.253)	113457|TUBA3D(8.253)	7846|TUBA1A(8.253)	1591|CYP24A1(5.859)	1544|CYP1A2(5.859)	51702|PADI3(5.859)	1559|CYP2C9(5.859)
Isotenulin	ID:11731 From TCMID database	5241|PGR(80.882)	367|AR(80.882)	1588|CYP19A1(80.882)	4306|NR3C2(80.882)	54361|WNT4(55.444)	2908|NR3C1(48.000)	8911|CACNA1I(23.000)	8913|CACNA1G(23.000)	8600|TNFSF11(22.373)	1289|COL5A1(22.373)	27035|NOX1(22.373)	5245|PHB(22.373)	5469|MED1(22.373)	4824|NKX3-1(22.373)	2099|ESR1(22.373)	4734|NEDD4(22.373)	6462|SHBG(22.373)	6317|SERPINB3(22.373)	50943|FOXP3(22.373)	727|C5(22.373)	6714|SRC(22.373)	26228|STAP1(22.373)	7042|TGFB2(22.373)	79148|MMP28(22.373)	51366|UBR5(22.373)	3586|IL10(22.373)	9970|NR1I3(22.373)	7128|TNFAIP3(22.373)	216|ALDH1A1(22.373)	3565|IL4(22.373)	706|TSPO(22.373)	1524|CX3CR1(22.373)	947|CD34(22.373)	6280|S100A9(22.373)	5155|PDGFB(22.373)	7421|VDR(22.373)	1131|CHRM3(15.365)	1128|CHRM1(15.365)	1129|CHRM2(15.365)	782|CACNB1(8.253)	781|CACNA2D1(8.253)	8912|CACNA1H(8.253)	778|CACNA1F(8.253)	773|CACNA1A(8.253)	9254|CACNA2D2(8.253)	779|CACNA1S(8.253)	55799|CACNA2D3(8.253)	785|CACNB4(8.253)
Salvianolic Acid C	ID:25343 From TCMID database	3614|IMPDH1(8.253)	3458|IFNG(8.253)	5742|PTGS1(8.253)	7172|TPMT(8.253)	5743|PTGS2(8.253)	3615|IMPDH2(8.253)	781|CACNA2D1(3.351)	8912|CACNA1H(3.351)	30814|PLA2G2E(3.351)	1646|AKR1C2(3.351)	9254|CACNA2D2(3.351)	5468|PPARG(3.351)	2356|FPGS(3.351)	38|ACAT1(3.351)	779|CACNA1S(3.351)	4353|MPO(3.351)	5319|PLA2G1B(3.351)	1645|AKR1C1(3.351)	775|CACNA1C(3.351)	776|CACNA1D(3.351)	1644|DDC(3.351)	23657|SLC7A11(3.351)	240|ALOX5(3.351)	3551|IKBKB(3.351)	1147|CHUK(3.351)	783|CACNB2(3.351)	4352|MPL(3.351)	185|AGTR1(3.351)	7298|TYMS(3.351)	6916|TBXAS1(3.351)	148|ADRA1A(2.608)	154|ADRB2(2.608)	1128|CHRM1(2.608)	150|ADRA2A(2.608)	153|ADRB1(2.608)	146|ADRA1D(2.608)	5053|PAH(2.608)	3757|KCNH2(2.608)	147|ADRA1B(2.608)	152|ADRA2C(2.608)	155|ADRB3(2.608)	1129|CHRM2(2.608)	151|ADRA2B(2.608)	|(2.394)	57573|ZNF471(2.394)	8563|THOC5(2.394)	8434|RECK(2.394)	10309|CCNO(2.394)
Methyl Tanshinonate	ID:14728 From TCMID database	8911|CACNA1I(15.365)	367|AR(15.365)	1636|ACE(15.365)	5742|PTGS1(15.365)	5743|PTGS2(15.365)	8913|CACNA1G(15.365)	2147|F2(15.365)	5241|PGR(8.253)	57053|CHRNA10(8.253)	1588|CYP19A1(8.253)	4306|NR3C2(8.253)	781|CACNA2D1(3.351)	8912|CACNA1H(3.351)	57105|CYSLTR2(3.351)	10800|CYSLTR1(3.351)	2099|ESR1(3.351)	9254|CACNA2D2(3.351)	5468|PPARG(3.351)	2356|FPGS(3.351)	779|CACNA1S(3.351)	2908|NR3C1(3.351)	5915|RARB(3.351)	775|CACNA1C(3.351)	776|CACNA1D(3.351)	2357|FPR1(3.351)	6564|SLC15A1(3.351)	9376|SLC22A8(3.351)	3577|CXCR1(3.351)	3359|HTR3A(3.351)	5914|RARA(3.351)	783|CACNB2(3.351)	3320|HSP90AA1(3.351)	6833|ABCC8(3.351)	6565|SLC15A2(3.351)	7298|TYMS(3.351)	5729|PTGDR(3.351)	6257|RXRB(2.608)	782|CACNB1(2.608)	148|ADRA1A(2.608)	6323|SCN1A(2.608)	7153|TOP2A(2.608)	778|CACNA1F(2.608)	1131|CHRM3(2.608)	1128|CHRM1(2.608)	150|ADRA2A(2.608)	1105|CHD1(2.608)	3776|KCNK2(2.608)	153|ADRB1(2.608)
Dihydroisotanshinone I	ID:5652 From TCMID database	1723|DHODH(48.000)	57053|CHRNA10(15.365)	5627|PROS1(5.785)	8858|PROZ(5.785)	4835|NQO2(5.785)	2155|F7(5.785)	2158|F9(5.785)	2677|GGCX(5.785)	2159|F10(5.785)	79001|VKORC1(5.785)	5624|PROC(5.785)	632|BGLAP(5.785)	3292|HSD17B1(5.785)	1728|NQO1(5.785)	154807|VKORC1L1(5.785)	2147|F2(5.785)	8654|PDE5A(3.351)	3764|KCNJ8(3.351)	5740|PTGIS(3.351)	1584|CYP11B1(3.351)	5742|PTGS1(3.351)	5743|PTGS2(3.351)	1585|CYP11B2(3.351)	8913|CACNA1G(3.351)	50940|PDE11A(3.351)	6257|RXRB(2.608)	5327|PLAT(2.608)	5141|PDE4A(2.608)	3859|KRT12(2.608)	836|CASP3(2.608)	54205|CYCS(2.608)	567|B2M(2.608)	4133|MAP2(2.608)	3553|IL1B(2.608)	5731|PTGER1(2.608)	4318|MMP9(2.608)	5144|PDE4D(2.608)	367|AR(2.608)	596|BCL2(2.608)	5739|PTGIR(2.608)	6258|RXRG(2.608)	8856|NR1I2(2.608)	5143|PDE4C(2.608)	4137|MAPT(2.608)	5621|PRNP(2.608)	7422|VEGFA(2.608)	240|ALOX5(2.608)	5737|PTGFR(2.608)
Tanshinone Vi	ID:20672 From TCMID database	6331|SCN5A(80.882)	6324|SCN1B(55.444)	3973|LHCGR(48.000)	6755|SSTR5(48.000)	6752|SSTR2(48.000)	6869|TACR1(48.000)	5972|REN(48.000)	2798|GNRHR(48.000)	6327|SCN2B(22.373)	23171|GPD1L(22.373)	55800|SCN3B(22.373)	287|ANK2(22.373)	6336|SCN10A(22.373)	776|CACNA1D(22.373)	23630|KCNE5(22.373)	4092|SMAD7(22.373)	6330|SCN4B(22.373)	859|CAV3(22.373)	3741|KCNA5(22.373)	4878|NPPA(22.373)	6262|RYR2(22.373)	3784|KCNQ1(22.373)	845|CASQ2(22.373)	2702|GJA5(22.373)	6323|SCN1A(15.365)	2555|GABRA2(15.365)	2563|GABRD(15.365)	2560|GABRB1(15.365)	2567|GABRG3(15.365)	2564|GABRE(15.365)	2556|GABRA3(15.365)	2570|GABRR2(15.365)	2565|GABRG1(15.365)	2568|GABRP(15.365)	2557|GABRA4(15.365)	2561|GABRB2(15.365)	2569|GABRR1(15.365)	55879|GABRQ(15.365)	2562|GABRB3(15.365)	2558|GABRA5(15.365)	200959|GABRR3(15.365)	2559|GABRA6(15.365)	6557|SLC12A1(15.365)	2554|GABRA1(15.365)	2566|GABRG2(15.365)	6715|SRD5A1(8.253)	6337|SCNN1A(8.253)	3764|KCNJ8(8.253)
Cryptotanshinone	ID:4291 From TCMID database	148|ADRA1A(15.365)	81033|KCNH6(15.365)	146|ADRA1D(15.365)	3757|KCNH2(15.365)	147|ADRA1B(15.365)	90134|KCNH7(15.365)	150|ADRA2A(8.253)	57053|CHRNA10(8.253)	2194|FASN(8.253)	151|ADRA2B(8.253)	6257|RXRB(5.785)	7153|TOP2A(5.785)	1105|CHD1(5.785)	6258|RXRG(5.785)	6256|RXRA(5.785)	7155|TOP2B(5.785)	10381|TUBB3(3.351)	4790|NFKB1(3.351)	5699|PSMB10(3.351)	6646|SOAT1(3.351)	4547|MTTP(3.351)	10800|CYSLTR1(3.351)	203068|TUBB(3.351)	1269|CNR2(3.351)	7124|TNF(3.351)	5698|PSMB9(3.351)	10382|TUBB4A(3.351)	84617|TUBB6(3.351)	2677|GGCX(3.351)	6037|RNASE3(3.351)	5021|OXTR(3.351)	347733|TUBB2B(3.351)	5693|PSMB5(3.351)	4583|MUC2(3.351)	3567|IL5(3.351)	5690|PSMB2(3.351)	1268|CNR1(3.351)	10383|TUBB4B(3.351)	5742|PTGS1(3.351)	5743|PTGS2(3.351)	7280|TUBB2A(3.351)	5696|PSMB8(3.351)	8435|SOAT2(3.351)	5689|PSMB1(3.351)	6531|SLC6A3(2.608)	11280|SCN11A(2.608)	266629|SEC14L3(2.608)	781|CACNA2D1(2.608)
Salvianolicacid B	ID:19187 From TCMID database	3614|IMPDH1(23.000)	3615|IMPDH2(23.000)	1269|CNR2(8.253)	1268|CNR1(8.253)	3251|HPRT1(5.859)	8833|GMPS(5.859)	6646|SOAT1(5.785)	4547|MTTP(5.785)	4985|OPRD1(5.785)	7099|TLR4(5.785)	2099|ESR1(5.785)	4986|OPRK1(5.785)	4988|OPRM1(5.785)	1385|CREB1(5.785)	5004|ORM1(5.785)	8435|SOAT2(5.785)	5005|ORM2(5.785)	266629|SEC14L3(3.351)	6257|RXRB(3.351)	1131|CHRM3(3.351)	5916|RARG(3.351)	5515|PPP2CA(3.351)	5915|RARB(3.351)	6258|RXRG(3.351)	3458|IFNG(3.351)	5578|PRKCA(3.351)	8856|NR1I2(3.351)	1135|CHRNA2(3.351)	5742|PTGS1(3.351)	7172|TPMT(3.351)	5743|PTGS2(3.351)	240|ALOX5(3.351)	5516|PPP2CB(3.351)	5947|RBP1(3.351)	23541|SEC14L2(3.351)	1606|DGKA(3.351)	5579|PRKCB(3.351)	5914|RARA(3.351)	590|BCHE(3.351)	1129|CHRM2(3.351)	6256|RXRA(3.351)	284904|SEC14L4(3.351)	1146|CHRNG(2.608)	6271|S100A1(2.608)	148|ADRA1A(2.608)	3859|KRT12(2.608)	7153|TOP2A(2.608)	1137|CHRNA4(2.608)
Tanshinol A	ID:20667 From TCMID database	1131|CHRM3(8.253)	1128|CHRM1(8.253)	10560|SLC19A2(8.253)	27010|TPK1(8.253)	1129|CHRM2(8.253)	1132|CHRM4(8.253)	8654|PDE5A(3.351)	5141|PDE4A(3.351)	8566|PDXK(3.351)	79001|VKORC1(3.351)	10846|PDE10A(3.351)	100|ADA(3.351)	6257|RXRB(2.608)	782|CACNB1(2.608)	8912|CACNA1H(2.608)	148|ADRA1A(2.608)	6323|SCN1A(2.608)	778|CACNA1F(2.608)	150|ADRA2A(2.608)	5916|RARG(2.608)	9254|CACNA2D2(2.608)	3776|KCNK2(2.608)	779|CACNA1S(2.608)	153|ADRB1(2.608)	785|CACNB4(2.608)	146|ADRA1D(2.608)	5915|RARB(2.608)	6258|RXRG(2.608)	775|CACNA1C(2.608)	776|CACNA1D(2.608)	784|CACNB3(2.608)	3757|KCNH2(2.608)	147|ADRA1B(2.608)	152|ADRA2C(2.608)	5914|RARA(2.608)	783|CACNB2(2.608)	6256|RXRA(2.608)	151|ADRA2B(2.608)	|(2.394)	57573|ZNF471(2.394)	8563|THOC5(2.394)	8434|RECK(2.394)	10309|CCNO(2.394)	7652|ZNF99(2.394)	80176|SPSB1(2.394)	386678|KRTAP10-11(2.394)	1387|CREBBP(2.394)	55854|ZC3H15(2.394)
3beta-Hydroxytanshinone Iia	ID:31275 From TCMID database	367|AR(15.365)	10381|TUBB3(8.253)	1131|CHRM3(8.253)	1128|CHRM1(8.253)	6331|SCN5A(8.253)	2908|NR3C1(8.253)	476|ATP1A1(8.253)	1129|CHRM2(8.253)	1132|CHRM4(8.253)	5327|PLAT(3.351)	2936|GSR(3.351)	5141|PDE4A(3.351)	2639|GCDH(3.351)	819|CAMLG(3.351)	56605|ERO1B(3.351)	478|ATP1A3(3.351)	3712|IVD(3.351)	4835|NQO2(3.351)	1806|DPYD(3.351)	203068|TUBB(3.351)	10382|TUBB4A(3.351)	5447|POR(3.351)	5731|PTGER1(3.351)	51706|CYB5R1(3.351)	4129|MAOB(3.351)	84617|TUBB6(3.351)	2232|FDXR(3.351)	645|BLVRB(3.351)	1610|DAO(3.351)	7296|TXNRD1(3.351)	35|ACADS(3.351)	5144|PDE4D(3.351)	5535|PPP3R2(3.351)	1727|CYB5R3(3.351)	347688|TUBB8(3.351)	57053|CHRNA10(3.351)	79001|VKORC1(3.351)	347733|TUBB2B(3.351)	5739|PTGIR(3.351)	4128|MAOA(3.351)	259307|IL4I1(3.351)	9131|AIFM1(3.351)	5478|PPIA(3.351)	10383|TUBB4B(3.351)	5143|PDE4C(3.351)	51|ACOX1(3.351)	477|ATP1A2(3.351)	10105|PPIF(3.351)
Daphneolone	ID:4641 From TCMID database	2099|ESR1(48.000)	240|ALOX5(48.000)	2100|ESR2(15.365)	367|AR(15.365)	8856|NR1I2(15.365)	1131|CHRM3(8.253)	1128|CHRM1(8.253)	2908|NR3C1(8.253)	3292|HSD17B1(8.253)	476|ATP1A1(8.253)	1129|CHRM2(8.253)	1132|CHRM4(8.253)	6531|SLC6A3(5.785)	6257|RXRB(5.785)	5327|PLAT(5.785)	148|ADRA1A(5.785)	2104|ESRRG(5.785)	2555|GABRA2(5.785)	3356|HTR2A(5.785)	2563|GABRD(5.785)	53637|S1PR5(5.785)	23428|SLC7A8(5.785)	154|ADRB2(5.785)	2560|GABRB1(5.785)	2567|GABRG3(5.785)	7056|THBD(5.785)	4985|OPRD1(5.785)	150|ADRA2A(5.785)	7054|TH(5.785)	1269|CNR2(5.785)	5916|RARG(5.785)	116444|GRIN3B(5.785)	7173|TPO(5.785)	2903|GRIN2A(5.785)	6331|SCN5A(5.785)	5468|PPARG(5.785)	6336|SCN10A(5.785)	2564|GABRE(5.785)	6326|SCN2A(5.785)	2556|GABRA3(5.785)	3242|HPD(5.785)	153|ADRB1(5.785)	2565|GABRG1(5.785)	2677|GGCX(5.785)	2568|GABRP(5.785)	6898|TAT(5.785)	3358|HTR2C(5.785)	57053|CHRNA10(5.785)
Tanshinone Ii A	ID:23205 From TCMID database	57053|CHRNA10(80.882)	5740|PTGIS(15.365)	79001|VKORC1(15.365)	1584|CYP11B1(15.365)	5742|PTGS1(15.365)	5743|PTGS2(15.365)	8913|CACNA1G(15.365)	8654|PDE5A(8.253)	3764|KCNJ8(8.253)	1585|CYP11B2(8.253)	50940|PDE11A(8.253)	1301|COL11A1(5.859)	117532|TMC2(5.859)	6558|SLC12A2(5.859)	222662|LHFPL5(5.859)	491|ATP2B2(5.859)	3815|KIT(5.859)	8195|MKKS(5.859)	161497|STRC(5.859)	3249|HPN(5.859)	79955|PDZD7(5.859)	117531|TMC1(5.859)	55584|CHRNA9(5.859)	1244|ABCC2(3.351)	8600|TNFSF11(3.351)	5159|PDGFRB(3.351)	3360|HTR4(3.351)	4790|NFKB1(3.351)	148|ADRA1A(3.351)	6261|RYR1(3.351)	2555|GABRA2(3.351)	5627|PROS1(3.351)	8858|PROZ(3.351)	2563|GABRD(3.351)	1137|CHRNA4(3.351)	552|AVPR1A(3.351)	2560|GABRB1(3.351)	4835|NQO2(3.351)	2567|GABRG3(3.351)	4914|NTRK1(3.351)	150|ADRA2A(3.351)	81033|KCNH6(3.351)	3351|HTR1B(3.351)	116444|GRIN3B(3.351)	7124|TNF(3.351)	1139|CHRNA7(3.351)	2903|GRIN2A(3.351)	1583|CYP11A1(3.351)
Dihydrovalepotriate	ID:5733 From TCMID database	8001|GLRA3(5.785)	5740|PTGIS(5.785)	64805|P2RY12(5.785)	5739|PTGIR(5.785)	476|ATP1A1(5.785)	2562|GABRB3(5.785)	6331|SCN5A(3.351)	2280|FKBP1A(2.608)	7153|TOP2A(2.608)	55244|SLC47A1(2.608)	8284|KDM5D(2.608)	221120|ALKBH3(2.608)	79676|OGFOD2(2.608)	10536|P3H3(2.608)	55217|TMLHE(2.608)	1576|CYP3A4(2.608)	54681|P4HTM(2.608)	4133|MAP2(2.608)	5351|PLOD1(2.608)	112398|EGLN2(2.608)	121642|ALKBH2(2.608)	1595|CYP51A1(2.608)	8424|BBOX1(2.608)	5241|PGR(2.608)	367|AR(2.608)	2908|NR3C1(2.608)	596|BCL2(2.608)	5578|PRKCA(2.608)	3156|HMGCR(2.608)	5066|PAM(2.608)	8856|NR1I2(2.608)	9963|SLC23A1(2.608)	3757|KCNH2(2.608)	2475|MTOR(2.608)	55239|OGFOD1(2.608)	3689|ITGB2(2.608)	4137|MAPT(2.608)	1621|DBH(2.608)	112399|EGLN3(2.608)	6608|SMO(2.608)	8985|PLOD3(2.608)	5033|P4HA1(2.608)	5737|PTGFR(2.608)	54583|EGLN1(2.608)	23569|PADI4(2.608)	4759|NEU2(2.608)	2862|MLNR(2.608)	28234|SLCO1B3(2.608)
Dehydrotremetone	ID:4975 From TCMID database	8654|PDE5A(23.000)	50940|PDE11A(23.000)	3360|HTR4(15.365)	148|ADRA1A(15.365)	6261|RYR1(15.365)	2555|GABRA2(15.365)	5627|PROS1(15.365)	8858|PROZ(15.365)	552|AVPR1A(15.365)	4835|NQO2(15.365)	150|ADRA2A(15.365)	81033|KCNH6(15.365)	3351|HTR1B(15.365)	2556|GABRA3(15.365)	2155|F7(15.365)	2158|F9(15.365)	2677|GGCX(15.365)	57053|CHRNA10(15.365)	146|ADRA1D(15.365)	2159|F10(15.365)	79001|VKORC1(15.365)	3725|JUN(15.365)	5624|PROC(15.365)	4988|OPRM1(15.365)	3757|KCNH2(15.365)	186|AGTR2(15.365)	632|BGLAP(15.365)	5742|PTGS1(15.365)	554|AVPR2(15.365)	3350|HTR1A(15.365)	147|ADRA1B(15.365)	5743|PTGS2(15.365)	3359|HTR3A(15.365)	2554|GABRA1(15.365)	1728|NQO1(15.365)	185|AGTR1(15.365)	90134|KCNH7(15.365)	151|ADRA2B(15.365)	154807|VKORC1L1(15.365)	2147|F2(15.365)	27115|PDE7B(8.253)	10381|TUBB3(8.253)	4790|NFKB1(8.253)	5141|PDE4A(8.253)	57105|CYSLTR2(8.253)	1962|EHHADH(8.253)	51807|TUBA8(8.253)	10800|CYSLTR1(8.253)
Gamma-Sitosterol	ID:29509 From TCMID database	2099|ESR1(122.778)	5241|PGR(122.778)	7421|VDR(80.882)	1594|CYP27B1(80.882)	2638|GC(55.444)	22938|SNW1(55.444)	367|AR(48.000)	2908|NR3C1(48.000)	4790|NFKB1(22.373)	8644|AKR1C3(22.373)	1591|CYP24A1(22.373)	151306|GPBAR1(22.373)	6591|SNAI2(22.373)	5469|MED1(22.373)	6615|SNAI1(22.373)	1576|CYP3A4(22.373)	793|CALB1(22.373)	8074|FGF23(22.373)	2672|GFI1(22.373)	55915|LANCL2(22.373)	54361|WNT4(22.373)	6929|TCF3(22.373)	581|BAX(22.373)	9365|KL(22.373)	120227|CYP2R1(22.373)	5371|PML(22.373)	2683|B4GALT1(22.373)	795|S100G(22.373)	1593|CYP27A1(22.373)	25959|KANK2(22.373)	10265|IRX5(22.373)	6256|RXRA(22.373)	9971|NR1H4(22.373)	8805|TRIM24(22.373)	1586|CYP17A1(15.365)	162514|TRPV3(15.365)	4986|OPRK1(15.365)	79054|TRPM8(15.365)	8989|TRPA1(15.365)	7054|TH(8.253)	5731|PTGER1(8.253)	7166|TPH1(8.253)	5053|PAH(8.253)	5733|PTGER3(8.253)	476|ATP1A1(8.253)	5737|PTGFR(8.253)	4846|NOS3(8.253)	51293|CD320(5.859)
Lithospermate B	ID:12918 From TCMID database	3614|IMPDH1(23.000)	3615|IMPDH2(23.000)	1269|CNR2(8.253)	1268|CNR1(8.253)	3251|HPRT1(5.859)	8833|GMPS(5.859)	6646|SOAT1(5.785)	4547|MTTP(5.785)	4985|OPRD1(5.785)	7099|TLR4(5.785)	2099|ESR1(5.785)	4986|OPRK1(5.785)	4988|OPRM1(5.785)	1385|CREB1(5.785)	5004|ORM1(5.785)	8435|SOAT2(5.785)	5005|ORM2(5.785)	266629|SEC14L3(3.351)	6257|RXRB(3.351)	1131|CHRM3(3.351)	5916|RARG(3.351)	5515|PPP2CA(3.351)	5915|RARB(3.351)	6258|RXRG(3.351)	3458|IFNG(3.351)	5578|PRKCA(3.351)	8856|NR1I2(3.351)	1135|CHRNA2(3.351)	5742|PTGS1(3.351)	7172|TPMT(3.351)	5743|PTGS2(3.351)	240|ALOX5(3.351)	5516|PPP2CB(3.351)	5947|RBP1(3.351)	23541|SEC14L2(3.351)	1606|DGKA(3.351)	5579|PRKCB(3.351)	5914|RARA(3.351)	590|BCHE(3.351)	1129|CHRM2(3.351)	6256|RXRA(3.351)	284904|SEC14L4(3.351)	1146|CHRNG(2.608)	6271|S100A1(2.608)	148|ADRA1A(2.608)	3859|KRT12(2.608)	7153|TOP2A(2.608)	1137|CHRNA4(2.608)
Mono-O-Methylwightin	ID:14920 From TCMID database	266629|SEC14L3(15.365)	6646|SOAT1(15.365)	4547|MTTP(15.365)	1269|CNR2(15.365)	5515|PPP2CA(15.365)	5578|PRKCA(15.365)	8856|NR1I2(15.365)	1268|CNR1(15.365)	240|ALOX5(15.365)	5516|PPP2CB(15.365)	23541|SEC14L2(15.365)	1606|DGKA(15.365)	5579|PRKCB(15.365)	8435|SOAT2(15.365)	284904|SEC14L4(15.365)	1429|CRYZ(8.253)	730005|SEC14L6(8.253)	79001|VKORC1(8.253)	7299|TYR(8.253)	1728|NQO1(8.253)	1813|DRD2(5.859)	5074|PAWR(5.859)	6286|S100P(5.785)	3778|KCNMA1(5.785)	10381|TUBB3(3.351)	4790|NFKB1(3.351)	2100|ESR2(3.351)	4985|OPRD1(3.351)	10800|CYSLTR1(3.351)	5531|PPP4C(3.351)	203068|TUBB(3.351)	2099|ESR1(3.351)	7124|TNF(3.351)	10382|TUBB4A(3.351)	84617|TUBB6(3.351)	6037|RNASE3(3.351)	347688|TUBB8(3.351)	347733|TUBB2B(3.351)	4986|OPRK1(3.351)	4583|MUC2(3.351)	3567|IL5(3.351)	4988|OPRM1(3.351)	10383|TUBB4B(3.351)	7280|TUBB2A(3.351)	5582|PRKCG(3.351)	81027|TUBB1(3.351)	1128|CHRM1(2.608)	1129|CHRM2(2.608)
Rutin	ID:19072 From TCMID database	6286|S100P(5.785)	3778|KCNMA1(5.785)	2100|ESR2(3.351)	2099|ESR1(3.351)	4790|NFKB1(2.608)	7153|TOP2A(2.608)	1128|CHRM1(2.608)	10800|CYSLTR1(2.608)	7124|TNF(2.608)	6037|RNASE3(2.608)	4583|MUC2(2.608)	3567|IL5(2.608)	213|ALB(2.608)	1129|CHRM2(2.608)	7155|TOP2B(2.608)	|(2.394)	57573|ZNF471(2.394)	8563|THOC5(2.394)	8434|RECK(2.394)	10309|CCNO(2.394)	7652|ZNF99(2.394)	80176|SPSB1(2.394)	386678|KRTAP10-11(2.394)	1387|CREBBP(2.394)	55854|ZC3H15(2.394)	150275|CCDC117(2.394)	79572|ATP13A3(2.394)	1785|DNM2(2.394)	2634|GBP2(2.394)	8419|BFSP2(2.394)	83548|COG3(2.394)	9363|RAB33A(2.394)	51599|LSR(2.394)	152926|PPM1K(2.394)	79618|HMBOX1(2.394)	401409|RAB19(2.394)	4893|NRAS(2.394)	347517|RAB41(2.394)	84071|ARMC2(2.394)	6531|SLC6A3(2.394)	7022|TFAP2C(2.394)	1244|ABCC2(2.394)	1638|DCT(2.394)	25953|PNKD(2.394)	1969|EPHA2(2.394)	374403|TBC1D10C(2.394)	339263|C17orf51(2.394)	112812|FDX1L(2.394)
Salvianolicacid A	ID:19186 From TCMID database	3458|IFNG(15.365)	5742|PTGS1(15.365)	7172|TPMT(15.365)	5743|PTGS2(15.365)	30814|PLA2G2E(8.253)	1646|AKR1C2(8.253)	5468|PPARG(8.253)	38|ACAT1(8.253)	4353|MPO(8.253)	5319|PLA2G1B(8.253)	1645|AKR1C1(8.253)	1644|DDC(8.253)	23657|SLC7A11(8.253)	240|ALOX5(8.253)	3551|IKBKB(8.253)	1147|CHUK(8.253)	6916|TBXAS1(8.253)	150|ADRA2A(5.785)	1813|DRD2(5.785)	1815|DRD4(5.785)	1814|DRD3(5.785)	1816|DRD5(5.785)	1812|DRD1(5.785)	8644|AKR1C3(3.351)	3614|IMPDH1(3.351)	1109|AKR1C4(3.351)	3615|IMPDH2(3.351)	4352|MPL(3.351)	6531|SLC6A3(2.608)	6257|RXRB(2.608)	782|CACNB1(2.608)	781|CACNA2D1(2.608)	5327|PLAT(2.608)	5581|PRKCE(2.608)	148|ADRA1A(2.608)	5141|PDE4A(2.608)	2104|ESRRG(2.608)	7153|TOP2A(2.608)	778|CACNA1F(2.608)	23428|SLC7A8(2.608)	154|ADRB2(2.608)	6646|SOAT1(2.608)	1131|CHRM3(2.608)	2100|ESR2(2.608)	6122|RPL3(2.608)	4547|MTTP(2.608)	1128|CHRM1(2.608)	4985|OPRD1(2.608)
Dauricine	ID:4684 From TCMID database	43|ACHE(122.778)	1135|CHRNA2(122.778)	3359|HTR3A(122.778)	1129|CHRM2(122.778)	3356|HTR2A(48.000)	1131|CHRM3(48.000)	3357|HTR2B(48.000)	150|ADRA2A(48.000)	3351|HTR1B(48.000)	3358|HTR2C(48.000)	3352|HTR1D(48.000)	1813|DRD2(48.000)	6571|SLC18A2(48.000)	1815|DRD4(48.000)	3350|HTR1A(48.000)	152|ADRA2C(48.000)	50632|CALY(48.000)	1814|DRD3(48.000)	1816|DRD5(48.000)	1812|DRD1(48.000)	590|BCHE(48.000)	151|ADRA2B(48.000)	2100|ESR2(15.365)	4985|OPRD1(15.365)	2099|ESR1(15.365)	4986|OPRK1(15.365)	4988|OPRM1(15.365)	1146|CHRNG(8.253)	1535|CYBA(8.253)	3775|KCNK1(8.253)	148|ADRA1A(8.253)	1137|CHRNA4(8.253)	5880|RAC2(8.253)	1142|CHRNB3(8.253)	5879|RAC1(8.253)	1128|CHRM1(8.253)	4689|NCF4(8.253)	1139|CHRNA7(8.253)	3362|HTR6(8.253)	6331|SCN5A(8.253)	1536|CYBB(8.253)	1134|CHRNA1(8.253)	653361|NCF1(8.253)	10280|SIGMAR1(8.253)	57053|CHRNA10(8.253)	146|ADRA1D(8.253)	4688|NCF2(8.253)	1136|CHRNA3(8.253)
Rosmarinine	ID:18911 From TCMID database	2280|FKBP1A(48.000)	2475|MTOR(48.000)	3764|KCNJ8(15.365)	3768|KCNJ12(15.365)	3356|HTR2A(15.365)	3357|HTR2B(15.365)	150|ADRA2A(15.365)	3351|HTR1B(15.365)	3767|KCNJ11(15.365)	3772|KCNJ15(15.365)	2908|NR3C1(15.365)	3358|HTR2C(15.365)	3352|HTR1D(15.365)	1813|DRD2(15.365)	3766|KCNJ10(15.365)	3350|HTR1A(15.365)	152|ADRA2C(15.365)	1814|DRD3(15.365)	3758|KCNJ1(15.365)	151|ADRA2B(15.365)	3770|KCNJ14(15.365)	10381|TUBB3(8.253)	1962|EHHADH(8.253)	478|ATP1A3(8.253)	55244|SLC47A1(8.253)	51174|TUBD1(8.253)	1576|CYP3A4(8.253)	1128|CHRM1(8.253)	51807|TUBA8(8.253)	203068|TUBB(8.253)	27175|TUBG2(8.253)	10382|TUBB4A(8.253)	112714|TUBA3E(8.253)	7150|TOP1(8.253)	84617|TUBB6(8.253)	1595|CYP51A1(8.253)	51175|TUBE1(8.253)	347688|TUBB8(8.253)	347733|TUBB2B(8.253)	3725|JUN(8.253)	3156|HMGCR(8.253)	3269|HRH1(8.253)	3757|KCNH2(8.253)	10383|TUBB4B(8.253)	3689|ITGB2(8.253)	100861540|CYP3A7-CYP3A51P(8.253)	1135|CHRNA2(8.253)	7278|TUBA3C(8.253)
6-Hydroxymethyllumazin	ID:10499 From TCMID database	8566|PDXK(80.882)	55163|PNPO(55.444)	3612|IMPA1(55.444)	57026|PDXP(22.373)	7167|TPI1(22.373)	2821|GPI(22.373)	29968|PSAT1(22.373)	316|AOX1(22.373)	7086|TKT(22.373)	55818|KDM3A(22.373)	8654|PDE5A(15.365)	5141|PDE4A(15.365)	10846|PDE10A(15.365)	100|ADA(15.365)	2100|ESR2(8.253)	2099|ESR1(8.253)	8856|NR1I2(8.253)	25769|SLC24A2(5.859)	825|CAPN3(5.859)	123041|SLC24A4(5.859)	57419|SLC24A3(5.859)	3767|KCNJ11(5.859)	5315|PKM(5.859)	481|ATP1B1(5.859)	55846|ITFG2(5.859)	6335|SCN9A(5.859)	5313|PKLR(5.859)	1716|DGUOK(5.859)	477|ATP1A2(5.859)	476|ATP1A1(5.859)	283652|SLC24A5(5.859)	9187|SLC24A1(5.859)	10568|SLC34A2(5.859)	7498|XDH(5.859)	3739|KCNA4(5.859)	134|ADORA1(5.859)	9759|HDAC4(5.859)	2350|FOLR2(5.785)	135|ADORA2A(5.785)	136|ADORA2B(5.785)	2352|FOLR3(5.785)	140|ADORA3(5.785)	5142|PDE4B(5.785)	782|CACNB1(3.351)	2893|GRIA4(3.351)	6323|SCN1A(3.351)	2555|GABRA2(3.351)	10369|CACNG2(3.351)
Danshenxinkun D	ID:4634 From TCMID database	1131|CHRM3(15.365)	1128|CHRM1(15.365)	1129|CHRM2(15.365)	1132|CHRM4(15.365)	5627|PROS1(5.785)	8858|PROZ(5.785)	4835|NQO2(5.785)	1723|DHODH(5.785)	2155|F7(5.785)	2158|F9(5.785)	2677|GGCX(5.785)	2159|F10(5.785)	79001|VKORC1(5.785)	5624|PROC(5.785)	632|BGLAP(5.785)	1728|NQO1(5.785)	154807|VKORC1L1(5.785)	2147|F2(5.785)	2908|NR3C1(3.351)	10560|SLC19A2(3.351)	1813|DRD2(3.351)	27010|TPK1(3.351)	1812|DRD1(3.351)	2798|GNRHR(3.351)	5327|PLAT(2.608)	5141|PDE4A(2.608)	3859|KRT12(2.608)	7153|TOP2A(2.608)	836|CASP3(2.608)	54205|CYCS(2.608)	6122|RPL3(2.608)	567|B2M(2.608)	1269|CNR2(2.608)	4133|MAP2(2.608)	3553|IL1B(2.608)	5740|PTGIS(2.608)	5731|PTGER1(2.608)	4318|MMP9(2.608)	3614|IMPDH1(2.608)	5144|PDE4D(2.608)	5241|PGR(2.608)	367|AR(2.608)	596|BCL2(2.608)	64805|P2RY12(2.608)	5739|PTGIR(2.608)	8856|NR1I2(2.608)	1268|CNR1(2.608)	5143|PDE4C(2.608)
Tanshinone Iib	ID:20671 From TCMID database	1131|CHRM3(23.000)	1128|CHRM1(23.000)	1129|CHRM2(23.000)	1132|CHRM4(23.000)	10560|SLC19A2(8.253)	27010|TPK1(8.253)	10564|ARFGEF2(5.859)	80005|DOCK5(5.859)	4923|NTSR1(5.859)	1133|CHRM5(5.859)	5023|P2RX1(5.859)	9732|DOCK4(5.859)	5604|MAP2K1(5.859)	8654|PDE5A(3.351)	5141|PDE4A(3.351)	8566|PDXK(3.351)	645|BLVRB(3.351)	2908|NR3C1(3.351)	57053|CHRNA10(3.351)	1813|DRD2(3.351)	79001|VKORC1(3.351)	10846|PDE10A(3.351)	55312|RFK(3.351)	7015|TERT(3.351)	1812|DRD1(3.351)	100|ADA(3.351)	3290|HSD11B1(3.351)	2798|GNRHR(3.351)	6257|RXRB(2.608)	782|CACNB1(2.608)	8912|CACNA1H(2.608)	148|ADRA1A(2.608)	6323|SCN1A(2.608)	7153|TOP2A(2.608)	778|CACNA1F(2.608)	150|ADRA2A(2.608)	9254|CACNA2D2(2.608)	1105|CHD1(2.608)	3776|KCNK2(2.608)	779|CACNA1S(2.608)	153|ADRB1(2.608)	785|CACNB4(2.608)	146|ADRA1D(2.608)	6258|RXRG(2.608)	775|CACNA1C(2.608)	776|CACNA1D(2.608)	784|CACNB3(2.608)	3757|KCNH2(2.608)
Samaderin A	ID:31928 From TCMID database	2280|FKBP1A(80.882)	2475|MTOR(80.882)	2247|FGF2(80.882)	4306|NR3C2(48.000)	2281|FKBP1B(23.000)	8817|FGF18(22.373)	8823|FGF16(22.373)	2672|GFI1(22.373)	89780|WNT3A(22.373)	84232|MAF1(22.373)	57521|RPTOR(22.373)	6514|SLC2A2(22.373)	202333|CMYA5(22.373)	8001|GLRA3(15.365)	4133|MAP2(15.365)	596|BCL2(15.365)	8856|NR1I2(15.365)	7278|TUBA3C(15.365)	4137|MAPT(15.365)	84790|TUBA1C(15.365)	2562|GABRB3(15.365)	10376|TUBA1B(15.365)	81027|TUBB1(15.365)	7277|TUBA4A(15.365)	4134|MAP4(15.365)	113457|TUBA3D(15.365)	7846|TUBA1A(15.365)	10381|TUBB3(8.253)	1962|EHHADH(8.253)	55244|SLC47A1(8.253)	1576|CYP3A4(8.253)	22978|NT5C2(8.253)	51807|TUBA8(8.253)	132|ADK(8.253)	112714|TUBA3E(8.253)	1595|CYP51A1(8.253)	5734|PTGER4(8.253)	3614|IMPDH1(8.253)	2908|NR3C1(8.253)	3156|HMGCR(8.253)	3757|KCNH2(8.253)	10383|TUBB4B(8.253)	3689|ITGB2(8.253)	5732|PTGER2(8.253)	5733|PTGER3(8.253)	5167|ENPP1(8.253)	2862|MLNR(8.253)	28234|SLCO1B3(8.253)
1-Hydroxytaxinine A	ID:10738 From TCMID database	5734|PTGER4(80.882)	5732|PTGER2(80.882)	5733|PTGER3(80.882)	11314|CD300A(55.444)	9928|KIF14(55.444)	5578|PRKCA(48.000)	3156|HMGCR(48.000)	5580|PRKCD(48.000)	4306|NR3C2(48.000)	2908|NR3C1(23.000)	23604|DAPK2(22.373)	4853|NOTCH2(22.373)	3248|HPGD(22.373)	5731|PTGER1(22.373)	101|ADAM8(22.373)	6369|CCL24(22.373)	3565|IL4(22.373)	5327|PLAT(15.365)	5141|PDE4A(15.365)	5144|PDE4D(15.365)	5739|PTGIR(15.365)	5143|PDE4C(15.365)	5142|PDE4B(15.365)	4133|MAP2(8.253)	112714|TUBA3E(8.253)	367|AR(8.253)	596|BCL2(8.253)	8856|NR1I2(8.253)	7278|TUBA3C(8.253)	4137|MAPT(8.253)	84790|TUBA1C(8.253)	476|ATP1A1(8.253)	10376|TUBA1B(8.253)	5579|PRKCB(8.253)	301|ANXA1(8.253)	81027|TUBB1(8.253)	7277|TUBA4A(8.253)	4134|MAP4(8.253)	113457|TUBA3D(8.253)	7846|TUBA1A(8.253)	8600|TNFSF11(5.859)	112|ADCY6(5.859)	207|AKT1(5.859)	11251|PTGDR2(5.859)	153222|CREBRF(5.859)	6609|SMPD1(5.859)	5581|PRKCE(5.859)	18|ABAT(5.859)
Salvianolic Acid B	ID:23168 From TCMID database	3614|IMPDH1(15.365)	3615|IMPDH2(15.365)	7153|TOP2A(5.785)	6646|SOAT1(5.785)	4547|MTTP(5.785)	4985|OPRD1(5.785)	7099|TLR4(5.785)	2099|ESR1(5.785)	4986|OPRK1(5.785)	4988|OPRM1(5.785)	1385|CREB1(5.785)	5004|ORM1(5.785)	8435|SOAT2(5.785)	5005|ORM2(5.785)	7155|TOP2B(5.785)	1269|CNR2(3.351)	1268|CNR1(3.351)	266629|SEC14L3(2.608)	1146|CHRNG(2.608)	6271|S100A1(2.608)	148|ADRA1A(2.608)	3859|KRT12(2.608)	1137|CHRNA4(2.608)	154|ADRB2(2.608)	1142|CHRNB3(2.608)	1131|CHRM3(2.608)	51174|TUBD1(2.608)	6122|RPL3(2.608)	4543|MTNR1A(2.608)	1128|CHRM1(2.608)	6284|S100A13(2.608)	150|ADRA2A(2.608)	203068|TUBB(2.608)	4133|MAP2(2.608)	1139|CHRNA7(2.608)	1105|CHD1(2.608)	4544|MTNR1B(2.608)	5515|PPP2CA(2.608)	1595|CYP51A1(2.608)	1134|CHRNA1(2.608)	51175|TUBE1(2.608)	153|ADRB1(2.608)	6570|SLC18A1(2.608)	57053|CHRNA10(2.608)	596|BCL2(2.608)	146|ADRA1D(2.608)	6283|S100A12(2.608)	64805|P2RY12(2.608)
Salvilenone	ID:19202 From TCMID database	57053|CHRNA10(15.365)	8654|PDE5A(3.351)	3764|KCNJ8(3.351)	5740|PTGIS(3.351)	79001|VKORC1(3.351)	1584|CYP11B1(3.351)	5742|PTGS1(3.351)	5743|PTGS2(3.351)	1585|CYP11B2(3.351)	8913|CACNA1G(3.351)	50940|PDE11A(3.351)	6531|SLC6A3(2.608)	6257|RXRB(2.608)	148|ADRA1A(2.608)	5627|PROS1(2.608)	8858|PROZ(2.608)	4835|NQO2(2.608)	1128|CHRM1(2.608)	10800|CYSLTR1(2.608)	1723|DHODH(2.608)	2155|F7(2.608)	2158|F9(2.608)	3614|IMPDH1(2.608)	2677|GGCX(2.608)	2159|F10(2.608)	5624|PROC(2.608)	6258|RXRG(2.608)	6532|SLC6A4(2.608)	3269|HRH1(2.608)	632|BGLAP(2.608)	3292|HSD17B1(2.608)	240|ALOX5(2.608)	1728|NQO1(2.608)	3615|IMPDH2(2.608)	6256|RXRA(2.608)	6530|SLC6A2(2.608)	154807|VKORC1L1(2.608)	2147|F2(2.608)	|(2.394)	57573|ZNF471(2.394)	8563|THOC5(2.394)	8434|RECK(2.394)	10309|CCNO(2.394)	7652|ZNF99(2.394)	80176|SPSB1(2.394)	386678|KRTAP10-11(2.394)	1387|CREBBP(2.394)	55854|ZC3H15(2.394)
O-Methyltaxodine	ID:14730 From TCMID database	3356|HTR2A(15.365)	1128|CHRM1(15.365)	3357|HTR2B(15.365)	3358|HTR2C(15.365)	1813|DRD2(15.365)	4128|MAOA(15.365)	6532|SLC6A4(15.365)	43|ACHE(15.365)	1812|DRD1(15.365)	6531|SLC6A3(8.253)	148|ADRA1A(8.253)	3269|HRH1(8.253)	3350|HTR1A(8.253)	147|ADRA1B(8.253)	6530|SLC6A2(8.253)	1788|DNMT3A(5.859)	6570|SLC18A1(5.859)	51286|CEND1(5.859)	8292|COLQ(5.859)	1268|CNR1(5.859)	1816|DRD5(5.859)	590|BCHE(5.859)	947|CD34(5.859)	2548|GAA(5.785)	8972|MGAM(5.785)	279|AMY2A(5.785)	6476|SI(5.785)	8912|CACNA1H(3.351)	778|CACNA1F(3.351)	478|ATP1A3(3.351)	1131|CHRM3(3.351)	773|CACNA1A(3.351)	150|ADRA2A(3.351)	8911|CACNA1I(3.351)	3351|HTR1B(3.351)	116444|GRIN3B(3.351)	9254|CACNA2D2(3.351)	3362|HTR6(3.351)	6336|SCN10A(3.351)	810|CALML3(3.351)	4129|MAOB(3.351)	779|CACNA1S(3.351)	5136|PDE1A(3.351)	146|ADRA1D(3.351)	3352|HTR1D(3.351)	5153|PDE1B(3.351)	775|CACNA1C(3.351)	776|CACNA1D(3.351)
Tanshinone Iia	ID:20670 From TCMID database	57053|CHRNA10(15.365)	1723|DHODH(5.785)	8654|PDE5A(3.351)	3764|KCNJ8(3.351)	5740|PTGIS(3.351)	79001|VKORC1(3.351)	1584|CYP11B1(3.351)	5742|PTGS1(3.351)	5743|PTGS2(3.351)	1585|CYP11B2(3.351)	8913|CACNA1G(3.351)	50940|PDE11A(3.351)	6257|RXRB(2.608)	27115|PDE7B(2.608)	5141|PDE4A(2.608)	3859|KRT12(2.608)	5627|PROS1(2.608)	7153|TOP2A(2.608)	8858|PROZ(2.608)	836|CASP3(2.608)	6347|CCL2(2.608)	54205|CYCS(2.608)	4835|NQO2(2.608)	567|B2M(2.608)	2099|ESR1(2.608)	5226|PGD(2.608)	3553|IL1B(2.608)	1105|CHD1(2.608)	4318|MMP9(2.608)	2155|F7(2.608)	2158|F9(2.608)	3614|IMPDH1(2.608)	5144|PDE4D(2.608)	5241|PGR(2.608)	2677|GGCX(2.608)	367|AR(2.608)	2159|F10(2.608)	5624|PROC(2.608)	6258|RXRG(2.608)	5150|PDE7A(2.608)	3269|HRH1(2.608)	632|BGLAP(2.608)	5143|PDE4C(2.608)	5621|PRNP(2.608)	7422|VEGFA(2.608)	3292|HSD17B1(2.608)	240|ALOX5(2.608)	23569|PADI4(2.608)
Isotanshinone Ii	ID:11727 From TCMID database	57053|CHRNA10(80.882)	5740|PTGIS(15.365)	79001|VKORC1(15.365)	1584|CYP11B1(15.365)	5742|PTGS1(15.365)	5743|PTGS2(15.365)	8913|CACNA1G(15.365)	8654|PDE5A(8.253)	3764|KCNJ8(8.253)	1585|CYP11B2(8.253)	50940|PDE11A(8.253)	1301|COL11A1(5.859)	117532|TMC2(5.859)	6558|SLC12A2(5.859)	222662|LHFPL5(5.859)	491|ATP2B2(5.859)	3815|KIT(5.859)	8195|MKKS(5.859)	161497|STRC(5.859)	3249|HPN(5.859)	79955|PDZD7(5.859)	117531|TMC1(5.859)	55584|CHRNA9(5.859)	6257|RXRB(5.785)	782|CACNB1(5.785)	8912|CACNA1H(5.785)	148|ADRA1A(5.785)	6323|SCN1A(5.785)	778|CACNA1F(5.785)	150|ADRA2A(5.785)	9254|CACNA2D2(5.785)	3776|KCNK2(5.785)	779|CACNA1S(5.785)	153|ADRB1(5.785)	785|CACNB4(5.785)	146|ADRA1D(5.785)	6258|RXRG(5.785)	775|CACNA1C(5.785)	776|CACNA1D(5.785)	784|CACNB3(5.785)	3757|KCNH2(5.785)	147|ADRA1B(5.785)	152|ADRA2C(5.785)	783|CACNB2(5.785)	6256|RXRA(5.785)	151|ADRA2B(5.785)	1244|ABCC2(3.351)	8600|TNFSF11(3.351)
Przewaquinone B	ID:17998 From TCMID database	1131|CHRM3(8.253)	1128|CHRM1(8.253)	10560|SLC19A2(8.253)	27010|TPK1(8.253)	1129|CHRM2(8.253)	1132|CHRM4(8.253)	8654|PDE5A(3.351)	5141|PDE4A(3.351)	8566|PDXK(3.351)	79001|VKORC1(3.351)	10846|PDE10A(3.351)	100|ADA(3.351)	782|CACNB1(2.608)	8912|CACNA1H(2.608)	148|ADRA1A(2.608)	6323|SCN1A(2.608)	778|CACNA1F(2.608)	150|ADRA2A(2.608)	9254|CACNA2D2(2.608)	3776|KCNK2(2.608)	779|CACNA1S(2.608)	153|ADRB1(2.608)	785|CACNB4(2.608)	146|ADRA1D(2.608)	775|CACNA1C(2.608)	776|CACNA1D(2.608)	784|CACNB3(2.608)	3757|KCNH2(2.608)	147|ADRA1B(2.608)	152|ADRA2C(2.608)	783|CACNB2(2.608)	151|ADRA2B(2.608)	|(2.394)	57573|ZNF471(2.394)	8563|THOC5(2.394)	8434|RECK(2.394)	10309|CCNO(2.394)	7652|ZNF99(2.394)	80176|SPSB1(2.394)	386678|KRTAP10-11(2.394)	1387|CREBBP(2.394)	55854|ZC3H15(2.394)	150275|CCDC117(2.394)	79572|ATP13A3(2.394)	2634|GBP2(2.394)	1785|DNM2(2.394)	8419|BFSP2(2.394)	83548|COG3(2.394)
Ursolicacid	ID:22254 From TCMID database	6715|SRD5A1(48.000)	1586|CYP17A1(48.000)	6546|SLC8A1(48.000)	2161|F12(48.000)	5618|PRLR(48.000)	2099|ESR1(48.000)	7442|TRPV1(48.000)	5731|PTGER1(48.000)	5734|PTGER4(48.000)	5241|PGR(48.000)	367|AR(48.000)	2908|NR3C1(48.000)	4986|OPRK1(48.000)	9415|FADS2(48.000)	3992|FADS1(48.000)	5732|PTGER2(48.000)	5742|PTGS1(48.000)	5733|PTGER3(48.000)	5743|PTGS2(48.000)	6785|ELOVL4(48.000)	301|ANXA1(48.000)	4306|NR3C2(48.000)	2104|ESRRG(23.000)	1345|COX6C(23.000)	1329|COX5B(23.000)	1350|COX7C(23.000)	4512|COX1(23.000)	1646|AKR1C2(23.000)	125|ADH1B(23.000)	9377|COX5A(23.000)	4514|COX3(23.000)	1346|COX7A1(23.000)	2235|FECH(23.000)	1327|COX4I1(23.000)	5319|PLA2G1B(23.000)	1645|AKR1C1(23.000)	1339|COX6A2(23.000)	3156|HMGCR(23.000)	126|ADH1C(23.000)	1340|COX6B1(23.000)	2172|FABP6(23.000)	1066|CES1(23.000)	1349|COX7B(23.000)	4513|COX2(23.000)	1351|COX8A(23.000)	9971|NR1H4(23.000)	124|ADH1A(15.365)	8644|AKR1C3(15.365)
Danshenol A	ID:4626 From TCMID database	1131|CHRM3(3.351)	1128|CHRM1(3.351)	4985|OPRD1(3.351)	5241|PGR(3.351)	367|AR(3.351)	2908|NR3C1(3.351)	4986|OPRK1(3.351)	4988|OPRM1(3.351)	5004|ORM1(3.351)	1129|CHRM2(3.351)	5005|ORM2(3.351)	1132|CHRM4(3.351)	3859|KRT12(2.608)	5627|PROS1(2.608)	7153|TOP2A(2.608)	8858|PROZ(2.608)	836|CASP3(2.608)	6347|CCL2(2.608)	54205|CYCS(2.608)	4835|NQO2(2.608)	567|B2M(2.608)	2099|ESR1(2.608)	4133|MAP2(2.608)	3553|IL1B(2.608)	1723|DHODH(2.608)	4318|MMP9(2.608)	2155|F7(2.608)	2158|F9(2.608)	2677|GGCX(2.608)	596|BCL2(2.608)	2159|F10(2.608)	79001|VKORC1(2.608)	5624|PROC(2.608)	3156|HMGCR(2.608)	8856|NR1I2(2.608)	1636|ACE(2.608)	632|BGLAP(2.608)	4137|MAPT(2.608)	5621|PRNP(2.608)	7422|VEGFA(2.608)	3292|HSD17B1(2.608)	240|ALOX5(2.608)	5737|PTGFR(2.608)	23569|PADI4(2.608)	1728|NQO1(2.608)	834|CASP1(2.608)	81027|TUBB1(2.608)	7277|TUBA4A(2.608)
Nortrachelogenin	ID:31727 From TCMID database	7153|TOP2A(15.365)	7155|TOP2B(15.365)	10381|TUBB3(8.253)	1962|EHHADH(8.253)	1131|CHRM3(8.253)	1128|CHRM1(8.253)	51807|TUBA8(8.253)	203068|TUBB(8.253)	10382|TUBB4A(8.253)	112714|TUBA3E(8.253)	84617|TUBB6(8.253)	3614|IMPDH1(8.253)	367|AR(8.253)	347688|TUBB8(8.253)	347733|TUBB2B(8.253)	1133|CHRM5(8.253)	10383|TUBB4B(8.253)	7278|TUBA3C(8.253)	84790|TUBA1C(8.253)	7280|TUBB2A(8.253)	10376|TUBA1B(8.253)	3615|IMPDH2(8.253)	7277|TUBA4A(8.253)	1129|CHRM2(8.253)	1132|CHRM4(8.253)	113457|TUBA3D(8.253)	7846|TUBA1A(8.253)	6531|SLC6A3(5.785)	266629|SEC14L3(5.785)	6257|RXRB(5.785)	782|CACNB1(5.785)	781|CACNA2D1(5.785)	1535|CYBA(5.785)	148|ADRA1A(5.785)	778|CACNA1F(5.785)	3356|HTR2A(5.785)	4130|MAP1A(5.785)	1137|CHRNA4(5.785)	5880|RAC2(5.785)	154|ADRB2(5.785)	6646|SOAT1(5.785)	2100|ESR2(5.785)	4543|MTNR1A(5.785)	5879|RAC1(5.785)	4547|MTTP(5.785)	773|CACNA1A(5.785)	4985|OPRD1(5.785)	7099|TLR4(5.785)
Dihydrokaranone	ID:5659 From TCMID database	1586|CYP17A1(122.778)	2099|ESR1(122.778)	5241|PGR(122.778)	4986|OPRK1(122.778)	4306|NR3C2(122.778)	27115|PDE7B(80.882)	8654|PDE5A(80.882)	5152|PDE9A(80.882)	5141|PDE4A(80.882)	6261|RYR1(80.882)	5139|PDE3A(80.882)	135|ADORA2A(80.882)	3708|ITPR1(80.882)	5145|PDE6A(80.882)	5591|PRKDC(80.882)	5293|PIK3CD(80.882)	5140|PDE3B(80.882)	5226|PGD(80.882)	5290|PIK3CA(80.882)	136|ADORA2B(80.882)	5136|PDE1A(80.882)	5144|PDE4D(80.882)	5291|PIK3CB(80.882)	3709|ITPR2(80.882)	5153|PDE1B(80.882)	5150|PDE7A(80.882)	3710|ITPR3(80.882)	23649|POLA2(80.882)	5143|PDE4C(80.882)	10846|PDE10A(80.882)	5137|PDE1C(80.882)	472|ATM(80.882)	5158|PDE6B(80.882)	5142|PDE4B(80.882)	5138|PDE2A(80.882)	134|ADORA1(80.882)	1588|CYP19A1(80.882)	8622|PDE8B(80.882)	4907|NT5E(80.882)	3066|HDAC2(80.882)	5146|PDE6C(80.882)	50940|PDE11A(80.882)	5151|PDE8A(80.882)	60561|RINT1(55.444)	8737|RIPK1(55.444)	5295|PIK3R1(55.444)	54361|WNT4(55.444)	6865|TACR2(55.444)
Salviol	ID:19204 From TCMID database	2100|ESR2(122.778)	2099|ESR1(122.778)	8856|NR1I2(122.778)	4986|OPRK1(48.000)	4988|OPRM1(48.000)	240|ALOX5(48.000)	7022|TFAP2C(22.373)	6513|SLC2A1(22.373)	27324|TOX3(22.373)	7040|TGFB1(22.373)	5469|MED1(22.373)	4824|NKX3-1(22.373)	6469|SHH(22.373)	51176|LEF1(22.373)	2263|FGFR2(22.373)	5241|PGR(22.373)	9429|ABCG2(22.373)	54361|WNT4(22.373)	374|AREG(22.373)	5244|ABCB4(22.373)	2852|GPER1(22.373)	7474|WNT5A(22.373)	6662|SOX9(22.373)	7421|VDR(22.373)	5243|ABCB1(22.373)	8805|TRIM24(22.373)	1586|CYP17A1(8.253)	8566|PDXK(8.253)	8600|TNFSF11(5.859)	207|AKT1(5.859)	131|ADH7(5.859)	4043|LRPAP1(5.859)	5728|PTEN(5.859)	3479|IGF1(5.859)	7476|WNT7A(5.859)	5618|PRLR(5.859)	3202|HOXA5(5.859)	3207|HOXA11(5.859)	6352|CCL5(5.859)	7301|TYRO3(5.859)	658|BMPR1B(5.859)	3398|ID2(5.859)	3169|FOXA1(5.859)	93649|MYOCD(5.859)	3973|LHCGR(5.859)	25836|NIPBL(5.859)	10481|HOXB13(5.859)	3239|HOXD13(5.859)
Isoferulic Acid	ID:23192 From TCMID database	6257|RXRB(15.365)	5916|RARG(15.365)	3614|IMPDH1(15.365)	5915|RARB(15.365)	6258|RXRG(15.365)	3458|IFNG(15.365)	7172|TPMT(15.365)	5947|RBP1(15.365)	5914|RARA(15.365)	3615|IMPDH2(15.365)	6256|RXRA(15.365)	30814|PLA2G2E(8.253)	1646|AKR1C2(8.253)	1269|CNR2(8.253)	5468|PPARG(8.253)	38|ACAT1(8.253)	4353|MPO(8.253)	5319|PLA2G1B(8.253)	1645|AKR1C1(8.253)	7299|TYR(8.253)	1268|CNR1(8.253)	5742|PTGS1(8.253)	5743|PTGS2(8.253)	23657|SLC7A11(8.253)	240|ALOX5(8.253)	3551|IKBKB(8.253)	1147|CHUK(8.253)	5465|PPARA(8.253)	6916|TBXAS1(8.253)	5581|PRKCE(5.785)	2104|ESRRG(5.785)	2100|ESR2(5.785)	10682|EBP(5.785)	2099|ESR1(5.785)	5578|PRKCA(5.785)	5588|PRKCQ(5.785)	5584|PRKCI(5.785)	5579|PRKCB(5.785)	5582|PRKCG(5.785)	5590|PRKCZ(5.785)	5580|PRKCD(5.785)	266629|SEC14L3(3.351)	8644|AKR1C3(3.351)	5515|PPP2CA(3.351)	64805|P2RY12(3.351)	5739|PTGIR(3.351)	8856|NR1I2(3.351)	5467|PPARD(3.351)
Daucosterol	ID:4679 From TCMID database	2548|GAA(8.253)	8972|MGAM(8.253)	135|ADORA2A(8.253)	5422|POLA1(8.253)	280|AMY2B(8.253)	136|ADORA2B(8.253)	2908|NR3C1(8.253)	279|AMY2A(8.253)	476|ATP1A1(8.253)	140|ADORA3(8.253)	6476|SI(8.253)	5423|POLB(8.253)	1786|DNMT1(8.253)	134|ADORA1(8.253)	7852|CXCR4(5.785)	55244|SLC47A1(5.785)	2100|ESR2(5.785)	1576|CYP3A4(5.785)	2099|ESR1(5.785)	8001|GLRA3(5.785)	4791|NFKB2(5.785)	7124|TNF(5.785)	3284|HSD3B2(5.785)	5740|PTGIS(5.785)	4318|MMP9(5.785)	1595|CYP51A1(5.785)	5241|PGR(5.785)	367|AR(5.785)	64805|P2RY12(5.785)	5739|PTGIR(5.785)	3458|IFNG(5.785)	3283|HSD3B1(5.785)	3156|HMGCR(5.785)	3757|KCNH2(5.785)	3689|ITGB2(5.785)	1719|DHFR(5.785)	6608|SMO(5.785)	2562|GABRB3(5.785)	2862|MLNR(5.785)	28234|SLCO1B3(5.785)	4036|LRP2(5.785)	301|ANXA1(5.785)	3683|ITGAL(5.785)	213|ALB(5.785)	3066|HDAC2(5.785)	7421|VDR(5.785)	5243|ABCB1(5.785)	10599|SLCO1B1(5.785)
[truncated: 206 more columns]

## Sheet: astragalus mongholicus
Astragaloside Vi	ID:1941 From TCMID database	7852|CXCR4(48.000)	135|ADORA2A(8.253)	22978|NT5C2(8.253)	5422|POLA1(8.253)	132|ADK(8.253)	136|ADORA2B(8.253)	3614|IMPDH1(8.253)	140|ADORA3(8.253)	5423|POLB(8.253)	5167|ENPP1(8.253)	100|ADA(8.253)	1786|DNMT1(8.253)	134|ADORA1(8.253)	6323|SCN1A(5.785)	2555|GABRA2(5.785)	2563|GABRD(5.785)	55244|SLC47A1(5.785)	2560|GABRB1(5.785)	2246|FGF1(5.785)	2567|GABRG3(5.785)	1576|CYP3A4(5.785)	4791|NFKB2(5.785)	7124|TNF(5.785)	2564|GABRE(5.785)	4318|MMP9(5.785)	2556|GABRA3(5.785)	1595|CYP51A1(5.785)	2266|FGG(5.785)	2565|GABRG1(5.785)	2568|GABRP(5.785)	2908|NR3C1(5.785)	2557|GABRA4(5.785)	2561|GABRB2(5.785)	3458|IFNG(5.785)	1950|EGF(5.785)	762|CA4(5.785)	3757|KCNH2(5.785)	2249|FGF4(5.785)	2244|FGB(5.785)	55879|GABRQ(5.785)	1719|DHFR(5.785)	476|ATP1A1(5.785)	2562|GABRB3(5.785)	2558|GABRA5(5.785)	23569|PADI4(5.785)	2559|GABRA6(5.785)	2554|GABRA1(5.785)	2243|FGA(5.785)
2-Hydroxy-3-Methoxystrychnine	ID:10456 From TCMID database	203068|TUBB(15.365)	10383|TUBB4B(15.365)	7277|TUBA4A(15.365)	10381|TUBB3(8.253)	1962|EHHADH(8.253)	51174|TUBD1(8.253)	4985|OPRD1(8.253)	51807|TUBA8(8.253)	27175|TUBG2(8.253)	10382|TUBB4A(8.253)	112714|TUBA3E(8.253)	84617|TUBB6(8.253)	51175|TUBE1(8.253)	347688|TUBB8(8.253)	347733|TUBB2B(8.253)	3725|JUN(8.253)	4986|OPRK1(8.253)	4988|OPRM1(8.253)	7278|TUBA3C(8.253)	84790|TUBA1C(8.253)	7280|TUBB2A(8.253)	10376|TUBA1B(8.253)	7283|TUBG1(8.253)	113457|TUBA3D(8.253)	7846|TUBA1A(8.253)	786|CACNG1(8.253)	6331|SCN5A(5.785)	81027|TUBB1(5.785)	1146|CHRNG(3.351)	3775|KCNK1(3.351)	6271|S100A1(3.351)	148|ADRA1A(3.351)	3356|HTR2A(3.351)	1137|CHRNA4(3.351)	154|ADRB2(3.351)	1142|CHRNB3(3.351)	1131|CHRM3(3.351)	1128|CHRM1(3.351)	3357|HTR2B(3.351)	7099|TLR4(3.351)	6284|S100A13(3.351)	150|ADRA2A(3.351)	3351|HTR1B(3.351)	2099|ESR1(3.351)	51305|KCNK9(3.351)	1139|CHRNA7(3.351)	1134|CHRNA1(3.351)	153|ADRB1(3.351)
Choline	ID:3589 From TCMID database	5337|PLD1(686.000)	5130|PCYT1A(686.000)	9468|PCYT1B(686.000)	162466|PHOSPHO1(686.000)	43|ACHE(686.000)	5338|PLD2(686.000)	590|BCHE(686.000)	8292|COLQ(55.444)	60482|SLC5A7(22.373)	3162|HMOX1(22.373)	3084|NRG1(22.373)	29958|DMGDH(22.373)	6496|SIX3(22.373)	5909|RAP1GAP(22.373)	1401|CRP(22.373)	222236|NAPEPLD(22.373)	6624|FSCN1(22.373)	8492|PRSS12(22.373)	688|KLF5(22.373)	80736|SLC44A4(22.373)	501|ALDH7A1(22.373)	26052|DNM3(22.373)	122618|PLD4(22.373)	429|ASCL1(22.373)	2822|GPLD1(22.373)	133121|ENPP6(22.373)	1006|CDH8(22.373)	23646|PLD3(22.373)	5420|PODXL(22.373)	2339|FNTA(22.373)	375790|AGRN(22.373)	1119|CHKA(22.373)	55349|CHDH(22.373)	5205|ATP8B1(22.373)	2902|GRIN1(22.373)	5141|PDE4A(8.253)	5139|PDE3A(8.253)	135|ADORA2A(8.253)	134|ADORA1(8.253)	3066|HDAC2(8.253)	1785|DNM2(5.859)	6531|SLC6A3(5.859)	10390|CEPT1(5.859)	2350|FOLR2(5.859)	4640|MYO1A(5.859)	10135|NAMPT(5.859)	351|APP(5.859)	6863|TAC1(5.859)
Uridine	ID:22236 From TCMID database	7298|TYMS(122.778)	22978|NT5C2(80.882)	132|ADK(80.882)	3614|IMPDH1(80.882)	5167|ENPP1(80.882)	5422|POLA1(48.000)	4860|PNP(48.000)	5423|POLB(48.000)	7015|TERT(48.000)	2936|GSR(23.000)	2639|GCDH(23.000)	56605|ERO1B(23.000)	3712|IVD(23.000)	4835|NQO2(23.000)	1806|DPYD(23.000)	5447|POR(23.000)	51706|CYB5R1(23.000)	4129|MAOB(23.000)	2232|FDXR(23.000)	1610|DAO(23.000)	7296|TXNRD1(23.000)	35|ACADS(23.000)	1727|CYB5R3(23.000)	4128|MAOA(23.000)	259307|IL4I1(23.000)	9131|AIFM1(23.000)	51|ACOX1(23.000)	34|ACADM(23.000)	1728|NQO1(23.000)	7498|XDH(23.000)	1786|DNMT1(23.000)	27034|ACAD8(23.000)	4842|NOS1(23.000)	1738|DLD(23.000)	2671|GFER(23.000)	26289|AK5(22.373)	2987|GUK1(22.373)	56172|ANKH(22.373)	5169|ENPP3(22.373)	353|APRT(22.373)	221264|AK9(22.373)	83594|NUDT12(22.373)	3615|IMPDH2(22.373)	10381|TUBB3(15.365)	135|ADORA2A(15.365)	203068|TUBB(15.365)	10382|TUBB4A(15.365)	84617|TUBB6(15.365)
Astragaloside Ii	ID:1937 From TCMID database	55244|SLC47A1(48.000)	1576|CYP3A4(48.000)	1595|CYP51A1(48.000)	3757|KCNH2(48.000)	476|ATP1A1(48.000)	2862|MLNR(48.000)	28234|SLCO1B3(48.000)	213|ALB(48.000)	5243|ABCB1(48.000)	10599|SLCO1B1(48.000)	8001|GLRA3(15.365)	2562|GABRB3(15.365)	478|ATP1A3(8.253)	100861540|CYP3A7-CYP3A51P(8.253)	477|ATP1A2(8.253)	23569|PADI4(8.253)	1551|CYP3A7(8.253)	781|CACNA2D1(5.785)	6323|SCN1A(5.785)	7852|CXCR4(5.785)	2555|GABRA2(5.785)	25824|PRDX5(5.785)	2563|GABRD(5.785)	2560|GABRB1(5.785)	2246|FGF1(5.785)	2567|GABRG3(5.785)	4791|NFKB2(5.785)	7124|TNF(5.785)	2564|GABRE(5.785)	4318|MMP9(5.785)	2556|GABRA3(5.785)	2565|GABRG1(5.785)	367|AR(5.785)	2568|GABRP(5.785)	2908|NR3C1(5.785)	2557|GABRA4(5.785)	2561|GABRB2(5.785)	3458|IFNG(5.785)	762|CA4(5.785)	2249|FGF4(5.785)	55879|GABRQ(5.785)	1719|DHFR(5.785)	1066|CES1(5.785)	2558|GABRA5(5.785)	2559|GABRA6(5.785)	3551|IKBKB(5.785)	2554|GABRA1(5.785)	2566|GABRG2(5.785)
Chrysanthemaxanthin	ID:3592 From TCMID database	100|ADA(23.000)	55846|ITFG2(22.373)	1716|DGUOK(22.373)	7498|XDH(22.373)	134|ADORA1(22.373)	1244|ABCC2(15.365)	2203|FBP1(15.365)	207|AKT1(15.365)	5564|PRKAB1(15.365)	90|ACVR1(15.365)	439|ASNA1(15.365)	157|ADRBK2(15.365)	55902|ACSS2(15.365)	94|ACVRL1(15.365)	107|ADCY1(15.365)	22978|NT5C2(15.365)	269|AMHR2(15.365)	10188|TNK2(15.365)	440|ASNS(15.365)	132|ADK(15.365)	27|ABL2(15.365)	156|ADRBK1(15.365)	5144|PDE4D(15.365)	2977|GUCY1A2(15.365)	292|SLC25A5(15.365)	5562|PRKAA1(15.365)	10060|ABCC9(15.365)	1385|CREB1(15.365)	84532|ACSS1(15.365)	5292|PIM1(15.365)	5836|PYGL(15.365)	25|ABL1(15.365)	10939|AFG3L2(15.365)	65061|CDK15(15.365)	3094|HINT1(15.365)	445|ASS1(15.365)	91|ACVR1B(15.365)	2180|ACSL1(15.365)	19|ABCA1(15.365)	293|SLC25A6(15.365)	5142|PDE4B(15.365)	8883|NAE1(15.365)	5565|PRKAB2(15.365)	1786|DNMT1(15.365)	317|APAF1(15.365)	6833|ABCC8(15.365)	238|ALK(15.365)	8647|ABCB11(15.365)
Soyasaponin 1	ID:24621 From TCMID database	2908|NR3C1(48.000)	476|ATP1A1(48.000)	4759|NEU2(15.365)	478|ATP1A3(8.253)	462|SERPINC1(8.253)	5740|PTGIS(8.253)	7150|TOP1(8.253)	2159|F10(8.253)	64805|P2RY12(8.253)	5739|PTGIR(8.253)	477|ATP1A2(8.253)	2280|FKBP1A(5.785)	7852|CXCR4(5.785)	2548|GAA(5.785)	8972|MGAM(5.785)	55244|SLC47A1(5.785)	1576|CYP3A4(5.785)	2099|ESR1(5.785)	8001|GLRA3(5.785)	1595|CYP51A1(5.785)	5734|PTGER4(5.785)	5241|PGR(5.785)	367|AR(5.785)	5578|PRKCA(5.785)	3156|HMGCR(5.785)	279|AMY2A(5.785)	3757|KCNH2(5.785)	2475|MTOR(5.785)	3689|ITGB2(5.785)	5732|PTGER2(5.785)	2194|FASN(5.785)	5733|PTGER3(5.785)	6608|SMO(5.785)	2562|GABRB3(5.785)	6476|SI(5.785)	5737|PTGFR(5.785)	23569|PADI4(5.785)	2862|MLNR(5.785)	28234|SLCO1B3(5.785)	301|ANXA1(5.785)	3683|ITGAL(5.785)	1588|CYP19A1(5.785)	213|ALB(5.785)	3066|HDAC2(5.785)	5243|ABCB1(5.785)	5580|PRKCD(5.785)	10599|SLCO1B1(5.785)	4306|NR3C2(5.785)
Lupeol	ID:13091 From TCMID database	7421|VDR(80.882)	1594|CYP27B1(80.882)	2638|GC(55.444)	22938|SNW1(55.444)	162514|TRPV3(48.000)	2099|ESR1(48.000)	5241|PGR(48.000)	4986|OPRK1(48.000)	79054|TRPM8(48.000)	8989|TRPA1(48.000)	4790|NFKB1(22.373)	8644|AKR1C3(22.373)	1591|CYP24A1(22.373)	151306|GPBAR1(22.373)	6591|SNAI2(22.373)	5469|MED1(22.373)	6615|SNAI1(22.373)	1576|CYP3A4(22.373)	793|CALB1(22.373)	8074|FGF23(22.373)	2672|GFI1(22.373)	55915|LANCL2(22.373)	54361|WNT4(22.373)	6929|TCF3(22.373)	581|BAX(22.373)	9365|KL(22.373)	120227|CYP2R1(22.373)	5371|PML(22.373)	2683|B4GALT1(22.373)	795|S100G(22.373)	1593|CYP27A1(22.373)	25959|KANK2(22.373)	10265|IRX5(22.373)	6256|RXRA(22.373)	9971|NR1H4(22.373)	8805|TRIM24(22.373)	1586|CYP17A1(15.365)	7054|TH(8.253)	5731|PTGER1(8.253)	7166|TPH1(8.253)	367|AR(8.253)	2908|NR3C1(8.253)	5053|PAH(8.253)	5733|PTGER3(8.253)	476|ATP1A1(8.253)	5737|PTGFR(8.253)	4846|NOS3(8.253)	51293|CD320(5.859)
Cycloastragenol	ID:4475 From TCMID database	2977|GUCY1A2(15.365)	2100|ESR2(8.253)	2099|ESR1(8.253)	3284|HSD3B2(8.253)	3283|HSD3B1(8.253)	100|ADA(8.253)	781|CACNA2D1(5.785)	7852|CXCR4(5.785)	4791|NFKB2(5.785)	7124|TNF(5.785)	4318|MMP9(5.785)	367|AR(5.785)	3458|IFNG(5.785)	1066|CES1(5.785)	4881|NPR1(5.785)	1244|ABCC2(3.351)	2203|FBP1(3.351)	207|AKT1(3.351)	6947|TCN1(3.351)	5564|PRKAB1(3.351)	90|ACVR1(3.351)	439|ASNA1(3.351)	157|ADRBK2(3.351)	55902|ACSS2(3.351)	4594|MUT(3.351)	135|ADORA2A(3.351)	94|ACVRL1(3.351)	107|ADCY1(3.351)	326625|MMAB(3.351)	22978|NT5C2(3.351)	269|AMHR2(3.351)	10188|TNK2(3.351)	5422|POLA1(3.351)	4552|MTRR(3.351)	440|ASNS(3.351)	8001|GLRA3(3.351)	132|ADK(3.351)	27|ABL2(3.351)	156|ADRBK1(3.351)	136|ADORA2B(3.351)	4548|MTR(3.351)	5144|PDE4D(3.351)	292|SLC25A5(3.351)	8029|CUBN(3.351)	5562|PRKAA1(3.351)	10060|ABCC9(3.351)	81693|AMN(3.351)	1385|CREB1(3.351)
20-Hexadecanoylingenol	ID:9488 From TCMID database	5578|PRKCA(122.778)	5580|PRKCD(122.778)	5734|PTGER4(23.000)	5732|PTGER2(23.000)	5733|PTGER3(23.000)	11314|CD300A(22.373)	1113|CHGA(22.373)	344|APOC2(22.373)	9928|KIF14(22.373)	5579|PRKCB(22.373)	2908|NR3C1(15.365)	5327|PLAT(8.253)	27115|PDE7B(8.253)	5141|PDE4A(8.253)	135|ADORA2A(8.253)	5731|PTGER1(8.253)	5144|PDE4D(8.253)	5739|PTGIR(8.253)	5150|PDE7A(8.253)	5143|PDE4C(8.253)	476|ATP1A1(8.253)	5582|PRKCG(8.253)	5142|PDE4B(8.253)	134|ADORA1(8.253)	301|ANXA1(8.253)	207|AKT1(5.859)	1535|CYBA(5.859)	23604|DAPK2(5.859)	6609|SMPD1(5.859)	23411|SIRT1(5.859)	114897|C1QTNF1(5.859)	5581|PRKCE(5.859)	51499|TRIAP1(5.859)	4869|NPM1(5.859)	7186|TRAF2(5.859)	57704|GBA2(5.859)	3728|JUP(5.859)	2717|GLA(5.859)	7040|TGFB1(5.859)	948|CD36(5.859)	9730|VPRBP(5.859)	4282|MIF(5.859)	6347|CCL2(5.859)	154|ADRB2(5.859)	2629|GBA(5.859)	83903|GSG2(5.859)	9378|NRXN1(5.859)	7357|UGCG(5.859)
Guanosine	ID:9070 From TCMID database	5422|POLA1(122.778)	135|ADORA2A(80.882)	5423|POLB(80.882)	1786|DNMT1(80.882)	4860|PNP(48.000)	136|ADORA2B(48.000)	140|ADORA3(48.000)	134|ADORA1(48.000)	6947|TCN1(23.000)	4594|MUT(23.000)	326625|MMAB(23.000)	4552|MTRR(23.000)	4548|MTR(23.000)	8029|CUBN(23.000)	81693|AMN(23.000)	25974|MMACHC(23.000)	166785|MMAA(23.000)	29128|UHRF1(22.373)	1788|DNMT3A(22.373)	5426|POLE(22.373)	672|BRCA1(22.373)	5591|PRKDC(22.373)	23028|KDM1A(22.373)	5428|POLG(22.373)	3981|LIG4(22.373)	7874|USP7(22.373)	6929|TCF3(22.373)	5424|POLD1(22.373)	5079|PAX5(22.373)	1787|TRDMT1(22.373)	6865|TACR2(22.373)	115426|UHRF2(22.373)	1789|DNMT3B(22.373)	10664|CTCF(22.373)	55818|KDM3A(22.373)	4255|MGMT(22.373)	3070|HELLS(22.373)	1244|ABCC2(15.365)	2203|FBP1(15.365)	207|AKT1(15.365)	5564|PRKAB1(15.365)	90|ACVR1(15.365)	439|ASNA1(15.365)	157|ADRBK2(15.365)	55902|ACSS2(15.365)	94|ACVRL1(15.365)	107|ADCY1(15.365)	22978|NT5C2(15.365)
Formononetin	ID:7882 From TCMID database	266629|SEC14L3(15.365)	6646|SOAT1(15.365)	4547|MTTP(15.365)	1269|CNR2(15.365)	5515|PPP2CA(15.365)	5578|PRKCA(15.365)	8856|NR1I2(15.365)	1268|CNR1(15.365)	240|ALOX5(15.365)	5516|PPP2CB(15.365)	23541|SEC14L2(15.365)	1606|DGKA(15.365)	5579|PRKCB(15.365)	8435|SOAT2(15.365)	284904|SEC14L4(15.365)	1429|CRYZ(8.253)	730005|SEC14L6(8.253)	79001|VKORC1(8.253)	7299|TYR(8.253)	1728|NQO1(8.253)	1813|DRD2(5.859)	5074|PAWR(5.859)	6286|S100P(5.785)	3778|KCNMA1(5.785)	10381|TUBB3(3.351)	4790|NFKB1(3.351)	2100|ESR2(3.351)	4985|OPRD1(3.351)	10800|CYSLTR1(3.351)	5531|PPP4C(3.351)	203068|TUBB(3.351)	2099|ESR1(3.351)	7124|TNF(3.351)	10382|TUBB4A(3.351)	84617|TUBB6(3.351)	6037|RNASE3(3.351)	347688|TUBB8(3.351)	347733|TUBB2B(3.351)	4986|OPRK1(3.351)	4583|MUC2(3.351)	3567|IL5(3.351)	4988|OPRM1(3.351)	10383|TUBB4B(3.351)	7280|TUBB2A(3.351)	5582|PRKCG(3.351)	81027|TUBB1(3.351)	6257|RXRB(2.608)	1128|CHRM1(2.608)
Isorhamnetin	ID:11645 From TCMID database	266629|SEC14L3(15.365)	6646|SOAT1(15.365)	4547|MTTP(15.365)	1269|CNR2(15.365)	5515|PPP2CA(15.365)	5578|PRKCA(15.365)	8856|NR1I2(15.365)	1268|CNR1(15.365)	240|ALOX5(15.365)	5516|PPP2CB(15.365)	23541|SEC14L2(15.365)	1606|DGKA(15.365)	5579|PRKCB(15.365)	8435|SOAT2(15.365)	284904|SEC14L4(15.365)	1429|CRYZ(8.253)	730005|SEC14L6(8.253)	79001|VKORC1(8.253)	7299|TYR(8.253)	1728|NQO1(8.253)	1813|DRD2(5.859)	5074|PAWR(5.859)	1128|CHRM1(5.785)	6286|S100P(5.785)	3778|KCNMA1(5.785)	1129|CHRM2(5.785)	10381|TUBB3(3.351)	4790|NFKB1(3.351)	2100|ESR2(3.351)	4985|OPRD1(3.351)	10800|CYSLTR1(3.351)	5531|PPP4C(3.351)	203068|TUBB(3.351)	2099|ESR1(3.351)	7124|TNF(3.351)	10382|TUBB4A(3.351)	84617|TUBB6(3.351)	6037|RNASE3(3.351)	347688|TUBB8(3.351)	347733|TUBB2B(3.351)	4986|OPRK1(3.351)	4583|MUC2(3.351)	3567|IL5(3.351)	4988|OPRM1(3.351)	10383|TUBB4B(3.351)	7280|TUBB2A(3.351)	5582|PRKCG(3.351)	81027|TUBB1(3.351)
Astramembrannin I	ID:1945 From TCMID database	7852|CXCR4(48.000)	135|ADORA2A(8.253)	22978|NT5C2(8.253)	5422|POLA1(8.253)	132|ADK(8.253)	136|ADORA2B(8.253)	3614|IMPDH1(8.253)	140|ADORA3(8.253)	5423|POLB(8.253)	5167|ENPP1(8.253)	100|ADA(8.253)	1786|DNMT1(8.253)	134|ADORA1(8.253)	6323|SCN1A(5.785)	2555|GABRA2(5.785)	2563|GABRD(5.785)	55244|SLC47A1(5.785)	2560|GABRB1(5.785)	2246|FGF1(5.785)	2567|GABRG3(5.785)	1576|CYP3A4(5.785)	4791|NFKB2(5.785)	7124|TNF(5.785)	2564|GABRE(5.785)	4318|MMP9(5.785)	2556|GABRA3(5.785)	1595|CYP51A1(5.785)	2266|FGG(5.785)	2565|GABRG1(5.785)	2568|GABRP(5.785)	2908|NR3C1(5.785)	2557|GABRA4(5.785)	2561|GABRB2(5.785)	3458|IFNG(5.785)	1950|EGF(5.785)	762|CA4(5.785)	3757|KCNH2(5.785)	2249|FGF4(5.785)	2244|FGB(5.785)	55879|GABRQ(5.785)	1719|DHFR(5.785)	476|ATP1A1(5.785)	2562|GABRB3(5.785)	2558|GABRA5(5.785)	23569|PADI4(5.785)	2559|GABRA6(5.785)	2554|GABRA1(5.785)	2243|FGA(5.785)
Beta-Sitosterol	ID:23097 From TCMID database	2099|ESR1(122.778)	5241|PGR(122.778)	7421|VDR(80.882)	1594|CYP27B1(80.882)	2638|GC(55.444)	22938|SNW1(55.444)	367|AR(48.000)	2908|NR3C1(48.000)	4790|NFKB1(22.373)	8644|AKR1C3(22.373)	1591|CYP24A1(22.373)	151306|GPBAR1(22.373)	6591|SNAI2(22.373)	5469|MED1(22.373)	6615|SNAI1(22.373)	1576|CYP3A4(22.373)	793|CALB1(22.373)	8074|FGF23(22.373)	2672|GFI1(22.373)	55915|LANCL2(22.373)	54361|WNT4(22.373)	6929|TCF3(22.373)	581|BAX(22.373)	9365|KL(22.373)	120227|CYP2R1(22.373)	5371|PML(22.373)	2683|B4GALT1(22.373)	795|S100G(22.373)	1593|CYP27A1(22.373)	25959|KANK2(22.373)	10265|IRX5(22.373)	6256|RXRA(22.373)	9971|NR1H4(22.373)	8805|TRIM24(22.373)	1586|CYP17A1(15.365)	162514|TRPV3(15.365)	4986|OPRK1(15.365)	79054|TRPM8(15.365)	8989|TRPA1(15.365)	7054|TH(8.253)	5731|PTGER1(8.253)	7166|TPH1(8.253)	5053|PAH(8.253)	5733|PTGER3(8.253)	476|ATP1A1(8.253)	5737|PTGFR(8.253)	4846|NOS3(8.253)	51293|CD320(5.859)
Astragaloside Iv	ID:1939 From TCMID database	135|ADORA2A(15.365)	5422|POLA1(15.365)	136|ADORA2B(15.365)	140|ADORA3(15.365)	5423|POLB(15.365)	1786|DNMT1(15.365)	134|ADORA1(15.365)	1244|ABCC2(8.253)	2203|FBP1(8.253)	207|AKT1(8.253)	5564|PRKAB1(8.253)	90|ACVR1(8.253)	439|ASNA1(8.253)	157|ADRBK2(8.253)	55902|ACSS2(8.253)	94|ACVRL1(8.253)	107|ADCY1(8.253)	22978|NT5C2(8.253)	269|AMHR2(8.253)	10188|TNK2(8.253)	440|ASNS(8.253)	132|ADK(8.253)	27|ABL2(8.253)	156|ADRBK1(8.253)	3614|IMPDH1(8.253)	5144|PDE4D(8.253)	6524|SLC5A2(8.253)	5562|PRKAA1(8.253)	10060|ABCC9(8.253)	1385|CREB1(8.253)	84532|ACSS1(8.253)	5292|PIM1(8.253)	5836|PYGL(8.253)	25|ABL1(8.253)	10939|AFG3L2(8.253)	65061|CDK15(8.253)	3094|HINT1(8.253)	445|ASS1(8.253)	91|ACVR1B(8.253)	2180|ACSL1(8.253)	19|ABCA1(8.253)	5167|ENPP1(8.253)	5142|PDE4B(8.253)	8883|NAE1(8.253)	100|ADA(8.253)	5565|PRKAB2(8.253)	6523|SLC5A1(8.253)	317|APAF1(8.253)
Rhamnocitrin	ID:18667 From TCMID database	266629|SEC14L3(15.365)	6646|SOAT1(15.365)	4547|MTTP(15.365)	1269|CNR2(15.365)	5515|PPP2CA(15.365)	5578|PRKCA(15.365)	8856|NR1I2(15.365)	1268|CNR1(15.365)	240|ALOX5(15.365)	5516|PPP2CB(15.365)	23541|SEC14L2(15.365)	1606|DGKA(15.365)	5579|PRKCB(15.365)	8435|SOAT2(15.365)	284904|SEC14L4(15.365)	1429|CRYZ(8.253)	730005|SEC14L6(8.253)	79001|VKORC1(8.253)	7299|TYR(8.253)	1728|NQO1(8.253)	1813|DRD2(5.859)	5074|PAWR(5.859)	1128|CHRM1(5.785)	6286|S100P(5.785)	3778|KCNMA1(5.785)	1129|CHRM2(5.785)	10381|TUBB3(3.351)	4790|NFKB1(3.351)	2100|ESR2(3.351)	4985|OPRD1(3.351)	10800|CYSLTR1(3.351)	5531|PPP4C(3.351)	203068|TUBB(3.351)	2099|ESR1(3.351)	7124|TNF(3.351)	10382|TUBB4A(3.351)	84617|TUBB6(3.351)	6037|RNASE3(3.351)	347688|TUBB8(3.351)	347733|TUBB2B(3.351)	4986|OPRK1(3.351)	4583|MUC2(3.351)	3567|IL5(3.351)	4988|OPRM1(3.351)	10383|TUBB4B(3.351)	7280|TUBB2A(3.351)	5582|PRKCG(3.351)	81027|TUBB1(3.351)
Suffruticoside A	ID:20435 From TCMID database	7153|TOP2A(15.365)	7155|TOP2B(15.365)	6646|SOAT1(5.785)	4547|MTTP(5.785)	203068|TUBB(5.785)	1105|CHD1(5.785)	6524|SLC5A2(5.785)	8435|SOAT2(5.785)	7277|TUBA4A(5.785)	10381|TUBB3(3.351)	1962|EHHADH(3.351)	55244|SLC47A1(3.351)	1576|CYP3A4(3.351)	4985|OPRD1(3.351)	51807|TUBA8(3.351)	4133|MAP2(3.351)	10382|TUBB4A(3.351)	112714|TUBA3E(3.351)	84617|TUBB6(3.351)	1595|CYP51A1(3.351)	2908|NR3C1(3.351)	347688|TUBB8(3.351)	596|BCL2(3.351)	347733|TUBB2B(3.351)	4986|OPRK1(3.351)	7184|HSP90B1(3.351)	4988|OPRM1(3.351)	8856|NR1I2(3.351)	3757|KCNH2(3.351)	10383|TUBB4B(3.351)	100861540|CYP3A7-CYP3A51P(3.351)	7278|TUBA3C(3.351)	4137|MAPT(3.351)	84790|TUBA1C(3.351)	7280|TUBB2A(3.351)	10376|TUBA1B(3.351)	2862|MLNR(3.351)	1551|CYP3A7(3.351)	28234|SLCO1B3(3.351)	3320|HSP90AA1(3.351)	81027|TUBB1(3.351)	213|ALB(3.351)	4134|MAP4(3.351)	5243|ABCB1(3.351)	113457|TUBA3D(3.351)	10599|SLCO1B1(3.351)	7846|TUBA1A(3.351)	6531|SLC6A3(2.608)
Betaine	ID:23051 From TCMID database	5471|PPAT(183.000)	4887|NPY2R(183.000)	1503|CTPS1(183.000)	1373|CPS1(183.000)	6750|SST(183.000)	2752|GLUL(183.000)	2806|GOT2(122.778)	6505|SLC1A1(122.778)	91703|ACY3(122.778)	443|ASPA(122.778)	122622|ADSSL1(122.778)	440|ASNS(122.778)	55157|DARS2(122.778)	2805|GOT1(122.778)	444|ASPH(122.778)	8604|SLC25A12(122.778)	1615|DARS(122.778)	80150|ASRGL1(122.778)	6035|RNASE1(122.778)	445|ASS1(122.778)	159|ADSS(122.778)	790|CAD(122.778)	95|ACY1(122.778)	10165|SLC25A13(122.778)	4069|LYZ(122.778)	10606|PAICS(122.778)	586|BCAT1(48.000)	7407|VARS(48.000)	6897|TARS(48.000)	79896|THNSL1(48.000)	80222|TARS2(48.000)	5096|PCCB(48.000)	8884|SLC5A6(36.688)	7357|UGCG(36.688)	11019|LIAS(36.688)	7054|TH(36.688)	51601|LIPT1(36.688)	3242|HPD(36.688)	7166|TPH1(36.688)	5053|PAH(36.688)	4846|NOS3(36.688)	6510|SLC1A5(15.365)	84706|GPT2(15.365)	570|BAAT(15.365)	51686|OAZ3(15.365)	6470|SHMT1(15.365)	18|ABAT(15.365)	6542|SLC7A2(15.365)
Soyasapogenol B	ID:20100 From TCMID database	2099|ESR1(122.778)	5241|PGR(122.778)	367|AR(48.000)	2908|NR3C1(48.000)	301|ANXA1(48.000)	51109|RDH11(15.365)	5949|RBP3(15.365)	54884|RETSAT(15.365)	112724|RDH13(15.365)	9249|DHRS3(15.365)	5959|RDH5(15.365)	220|ALDH1A3(15.365)	145226|RDH12(15.365)	10901|DHRS4(15.365)	5947|RBP1(15.365)	216|ALDH1A1(15.365)	6017|RLBP1(15.365)	57665|RDH14(15.365)	50700|RDH8(15.365)	9227|LRAT(15.365)	8854|ALDH1A2(15.365)	7421|VDR(15.365)	1594|CYP27B1(15.365)	27115|PDE7B(8.253)	5141|PDE4A(8.253)	1586|CYP17A1(8.253)	135|ADORA2A(8.253)	1595|CYP51A1(8.253)	5144|PDE4D(8.253)	5150|PDE7A(8.253)	5143|PDE4C(8.253)	5142|PDE4B(8.253)	100|ADA(8.253)	134|ADORA1(8.253)	218|ALDH3A1(5.859)	6010|RHO(5.859)	2638|GC(5.859)	22938|SNW1(5.859)	6247|RS1(5.859)	6257|RXRB(5.785)	6715|SRD5A1(5.785)	6546|SLC8A1(5.785)	2161|F12(5.785)	5618|PRLR(5.785)	5918|RARRES1(5.785)	162514|TRPV3(5.785)	190|NR0B1(5.785)	7442|TRPV1(5.785)
Kaempferol	ID:12017 From TCMID database	3292|HSD17B1(26.373)	1429|CRYZ(23.000)	79001|VKORC1(23.000)	1728|NQO1(23.000)	9946|CRYZL1(5.859)	84869|CBR4(5.859)	127|ADH4(5.859)	154807|VKORC1L1(5.859)	9540|TP53I3(5.859)	1128|CHRM1(5.785)	6286|S100P(5.785)	3778|KCNMA1(5.785)	1129|CHRM2(5.785)	5139|PDE3A(3.351)	6646|SOAT1(3.351)	4547|MTTP(3.351)	2099|ESR1(3.351)	1269|CNR2(3.351)	2356|FPGS(3.351)	1268|CNR1(3.351)	8435|SOAT2(3.351)	7298|TYMS(3.351)	4790|NFKB1(2.608)	10800|CYSLTR1(2.608)	7124|TNF(2.608)	6037|RNASE3(2.608)	4583|MUC2(2.608)	3567|IL5(2.608)	|(2.394)	57573|ZNF471(2.394)	8563|THOC5(2.394)	8434|RECK(2.394)	10309|CCNO(2.394)	7652|ZNF99(2.394)	80176|SPSB1(2.394)	386678|KRTAP10-11(2.394)	1387|CREBBP(2.394)	55854|ZC3H15(2.394)	150275|CCDC117(2.394)	79572|ATP13A3(2.394)	2634|GBP2(2.394)	1785|DNM2(2.394)	8419|BFSP2(2.394)	83548|COG3(2.394)	9363|RAB33A(2.394)	51599|LSR(2.394)	152926|PPM1K(2.394)	79618|HMBOX1(2.394)
Foliosidine	ID:7853 From TCMID database	148|ADRA1A(5.785)	2697|GJA1(5.785)	154|ADRB2(5.785)	150|ADRA2A(5.785)	3351|HTR1B(5.785)	7412|VCAM1(5.785)	153|ADRB1(5.785)	146|ADRA1D(5.785)	4718|NDUFC2(5.785)	6401|SELE(5.785)	3757|KCNH2(5.785)	3091|HIF1A(5.785)	7422|VEGFA(5.785)	3350|HTR1A(5.785)	147|ADRA1B(5.785)	152|ADRA2C(5.785)	151|ADRA2B(5.785)	4879|NPPB(5.785)	6331|SCN5A(3.351)	759|CA1(3.351)	3775|KCNK1(2.608)	6470|SHMT1(2.608)	7153|TOP2A(2.608)	6347|CCL2(2.608)	1589|CYP21A2(2.608)	4835|NQO2(2.608)	6336|SCN10A(2.608)	10988|METAP2(2.608)	645|BLVRB(2.608)	1595|CYP51A1(2.608)	367|AR(2.608)	3855|KRT7(2.608)	5321|PLA2G4A(2.608)	5753|PTK6(2.608)	7299|TYR(2.608)	43|ACHE(2.608)	2815|GP9(2.608)	3783|KCNN4(2.608)	55312|RFK(2.608)	7010|TEK(2.608)	9424|KCNK6(2.608)	805|CALM2(2.608)	590|BCHE(2.608)	155|ADRB3(2.608)	808|CALM3(2.608)	1588|CYP19A1(2.608)	5334|PLCL1(2.608)	1956|EGFR(2.608)
Quercetin	ID:18302 From TCMID database	3356|HTR2A(26.373)	3357|HTR2B(26.373)	150|ADRA2A(26.373)	3351|HTR1B(26.373)	3358|HTR2C(26.373)	3352|HTR1D(26.373)	1813|DRD2(26.373)	1815|DRD4(26.373)	3350|HTR1A(26.373)	152|ADRA2C(26.373)	50632|CALY(26.373)	1814|DRD3(26.373)	1816|DRD5(26.373)	1812|DRD1(26.373)	151|ADRA2B(26.373)	1429|CRYZ(15.365)	79001|VKORC1(15.365)	1728|NQO1(15.365)	1128|CHRM1(5.785)	6286|S100P(5.785)	3778|KCNMA1(5.785)	1129|CHRM2(5.785)	1312|COMT(3.351)	240|ALOX5(3.351)	4790|NFKB1(2.608)	10800|CYSLTR1(2.608)	7124|TNF(2.608)	6037|RNASE3(2.608)	4583|MUC2(2.608)	3567|IL5(2.608)	|(2.394)	57573|ZNF471(2.394)	8563|THOC5(2.394)	8434|RECK(2.394)	10309|CCNO(2.394)	7652|ZNF99(2.394)	80176|SPSB1(2.394)	386678|KRTAP10-11(2.394)	1387|CREBBP(2.394)	55854|ZC3H15(2.394)	150275|CCDC117(2.394)	79572|ATP13A3(2.394)	2634|GBP2(2.394)	1785|DNM2(2.394)	8419|BFSP2(2.394)	83548|COG3(2.394)	9363|RAB33A(2.394)	51599|LSR(2.394)
Kumatakenin	ID:12327 From TCMID database	266629|SEC14L3(15.365)	6646|SOAT1(15.365)	4547|MTTP(15.365)	1269|CNR2(15.365)	5515|PPP2CA(15.365)	5578|PRKCA(15.365)	8856|NR1I2(15.365)	1268|CNR1(15.365)	240|ALOX5(15.365)	5516|PPP2CB(15.365)	23541|SEC14L2(15.365)	1606|DGKA(15.365)	5579|PRKCB(15.365)	8435|SOAT2(15.365)	284904|SEC14L4(15.365)	1429|CRYZ(8.253)	730005|SEC14L6(8.253)	79001|VKORC1(8.253)	7299|TYR(8.253)	1728|NQO1(8.253)	1813|DRD2(5.859)	5074|PAWR(5.859)	1128|CHRM1(5.785)	6286|S100P(5.785)	3778|KCNMA1(5.785)	1129|CHRM2(5.785)	10381|TUBB3(3.351)	4790|NFKB1(3.351)	2100|ESR2(3.351)	4985|OPRD1(3.351)	10800|CYSLTR1(3.351)	5531|PPP4C(3.351)	203068|TUBB(3.351)	2099|ESR1(3.351)	7124|TNF(3.351)	10382|TUBB4A(3.351)	84617|TUBB6(3.351)	6037|RNASE3(3.351)	347688|TUBB8(3.351)	347733|TUBB2B(3.351)	4986|OPRK1(3.351)	4583|MUC2(3.351)	3567|IL5(3.351)	4988|OPRM1(3.351)	10383|TUBB4B(3.351)	7280|TUBB2A(3.351)	5582|PRKCG(3.351)	81027|TUBB1(3.351)
Astragaloside V	ID:1940 From TCMID database	7852|CXCR4(48.000)	135|ADORA2A(15.365)	5422|POLA1(15.365)	136|ADORA2B(15.365)	140|ADORA3(15.365)	5423|POLB(15.365)	1786|DNMT1(15.365)	134|ADORA1(15.365)	1244|ABCC2(8.253)	2203|FBP1(8.253)	207|AKT1(8.253)	5564|PRKAB1(8.253)	90|ACVR1(8.253)	439|ASNA1(8.253)	157|ADRBK2(8.253)	55902|ACSS2(8.253)	94|ACVRL1(8.253)	107|ADCY1(8.253)	22978|NT5C2(8.253)	269|AMHR2(8.253)	10188|TNK2(8.253)	440|ASNS(8.253)	132|ADK(8.253)	27|ABL2(8.253)	156|ADRBK1(8.253)	3614|IMPDH1(8.253)	5144|PDE4D(8.253)	6524|SLC5A2(8.253)	5562|PRKAA1(8.253)	10060|ABCC9(8.253)	1385|CREB1(8.253)	84532|ACSS1(8.253)	5292|PIM1(8.253)	5836|PYGL(8.253)	25|ABL1(8.253)	10939|AFG3L2(8.253)	65061|CDK15(8.253)	3094|HINT1(8.253)	445|ASS1(8.253)	91|ACVR1B(8.253)	2180|ACSL1(8.253)	19|ABCA1(8.253)	5167|ENPP1(8.253)	5142|PDE4B(8.253)	8883|NAE1(8.253)	100|ADA(8.253)	5565|PRKAB2(8.253)	6523|SLC5A1(8.253)
Astragaloside Iii	ID:1938 From TCMID database	7852|CXCR4(48.000)	135|ADORA2A(8.253)	22978|NT5C2(8.253)	5422|POLA1(8.253)	132|ADK(8.253)	136|ADORA2B(8.253)	3614|IMPDH1(8.253)	140|ADORA3(8.253)	5423|POLB(8.253)	5167|ENPP1(8.253)	100|ADA(8.253)	1786|DNMT1(8.253)	134|ADORA1(8.253)	6323|SCN1A(5.785)	2555|GABRA2(5.785)	2563|GABRD(5.785)	55244|SLC47A1(5.785)	2560|GABRB1(5.785)	2246|FGF1(5.785)	2567|GABRG3(5.785)	1576|CYP3A4(5.785)	4791|NFKB2(5.785)	7124|TNF(5.785)	2564|GABRE(5.785)	4318|MMP9(5.785)	2556|GABRA3(5.785)	1595|CYP51A1(5.785)	2266|FGG(5.785)	2565|GABRG1(5.785)	2568|GABRP(5.785)	2908|NR3C1(5.785)	2557|GABRA4(5.785)	2561|GABRB2(5.785)	3458|IFNG(5.785)	1950|EGF(5.785)	762|CA4(5.785)	3757|KCNH2(5.785)	2249|FGF4(5.785)	2244|FGB(5.785)	55879|GABRQ(5.785)	1719|DHFR(5.785)	476|ATP1A1(5.785)	2562|GABRB3(5.785)	2558|GABRA5(5.785)	23569|PADI4(5.785)	2559|GABRA6(5.785)	2554|GABRA1(5.785)	2243|FGA(5.785)
Gamma-Sitosterol	ID:29509 From TCMID database	2099|ESR1(122.778)	5241|PGR(122.778)	7421|VDR(80.882)	1594|CYP27B1(80.882)	2638|GC(55.444)	22938|SNW1(55.444)	367|AR(48.000)	2908|NR3C1(48.000)	4790|NFKB1(22.373)	8644|AKR1C3(22.373)	1591|CYP24A1(22.373)	151306|GPBAR1(22.373)	6591|SNAI2(22.373)	5469|MED1(22.373)	6615|SNAI1(22.373)	1576|CYP3A4(22.373)	793|CALB1(22.373)	8074|FGF23(22.373)	2672|GFI1(22.373)	55915|LANCL2(22.373)	54361|WNT4(22.373)	6929|TCF3(22.373)	581|BAX(22.373)	9365|KL(22.373)	120227|CYP2R1(22.373)	5371|PML(22.373)	2683|B4GALT1(22.373)	795|S100G(22.373)	1593|CYP27A1(22.373)	25959|KANK2(22.373)	10265|IRX5(22.373)	6256|RXRA(22.373)	9971|NR1H4(22.373)	8805|TRIM24(22.373)	1586|CYP17A1(15.365)	162514|TRPV3(15.365)	4986|OPRK1(15.365)	79054|TRPM8(15.365)	8989|TRPA1(15.365)	7054|TH(8.253)	5731|PTGER1(8.253)	7166|TPH1(8.253)	5053|PAH(8.253)	5733|PTGER3(8.253)	476|ATP1A1(8.253)	5737|PTGFR(8.253)	4846|NOS3(8.253)	51293|CD320(5.859)
Astragaloside I	ID:1936 From TCMID database	55244|SLC47A1(48.000)	1576|CYP3A4(48.000)	1595|CYP51A1(48.000)	3757|KCNH2(48.000)	476|ATP1A1(48.000)	2862|MLNR(48.000)	28234|SLCO1B3(48.000)	213|ALB(48.000)	5243|ABCB1(48.000)	10599|SLCO1B1(48.000)	8001|GLRA3(15.365)	2562|GABRB3(15.365)	478|ATP1A3(8.253)	100861540|CYP3A7-CYP3A51P(8.253)	477|ATP1A2(8.253)	23569|PADI4(8.253)	1551|CYP3A7(8.253)	781|CACNA2D1(5.785)	6323|SCN1A(5.785)	7852|CXCR4(5.785)	2555|GABRA2(5.785)	25824|PRDX5(5.785)	2563|GABRD(5.785)	2560|GABRB1(5.785)	2246|FGF1(5.785)	2567|GABRG3(5.785)	4791|NFKB2(5.785)	7124|TNF(5.785)	2564|GABRE(5.785)	4318|MMP9(5.785)	2556|GABRA3(5.785)	2565|GABRG1(5.785)	367|AR(5.785)	2568|GABRP(5.785)	2908|NR3C1(5.785)	2557|GABRA4(5.785)	2561|GABRB2(5.785)	3458|IFNG(5.785)	762|CA4(5.785)	2249|FGF4(5.785)	55879|GABRQ(5.785)	1719|DHFR(5.785)	1066|CES1(5.785)	2558|GABRA5(5.785)	2559|GABRA6(5.785)	3551|IKBKB(5.785)	2554|GABRA1(5.785)	2566|GABRG2(5.785)
3,5-Dimethoxystilbene	ID:6292 From TCMID database	5141|PDE4A(80.882)	5139|PDE3A(80.882)	775|CACNA1C(80.882)	1787|TRDMT1(80.882)	200895|DHFRL1(80.882)	1719|DHFR(80.882)	10846|PDE10A(80.882)	5138|PDE2A(80.882)	7298|TYMS(80.882)	6470|SHMT1(55.444)	5140|PDE3B(55.444)	2039|DMTN(55.444)	3778|KCNMA1(55.444)	1244|ABCC2(22.373)	2350|FOLR2(22.373)	8654|PDE5A(22.373)	5152|PDE9A(22.373)	9519|TBPL1(22.373)	1788|DNMT3A(22.373)	10273|STUB1(22.373)	3643|INSR(22.373)	22953|P2RX2(22.373)	3356|HTR2A(22.373)	22933|SIRT2(22.373)	10021|HCN4(22.373)	1806|DPYD(22.373)	3202|HOXA5(22.373)	2192|FBLN1(22.373)	9356|SLC22A6(22.373)	440|ASNS(22.373)	132|ADK(22.373)	3553|IL1B(22.373)	56953|NT5M(22.373)	5024|P2RX3(22.373)	6790|AURKA(22.373)	2621|GAS6(22.373)	129607|CMPK2(22.373)	5153|PDE1B(22.373)	1807|DPYS(22.373)	1136|CHRNA3(22.373)	3326|HSP90AB1(22.373)	1141|CHRNB2(22.373)	6532|SLC6A4(22.373)	1854|DUT(22.373)	9693|RAPGEF2(22.373)	471|ATIC(22.373)	221264|AK9(22.373)	1026|CDKN1A(22.373)
Calycosin	ID:3004 From TCMID database	266629|SEC14L3(15.365)	6646|SOAT1(15.365)	4547|MTTP(15.365)	1269|CNR2(15.365)	5515|PPP2CA(15.365)	5578|PRKCA(15.365)	8856|NR1I2(15.365)	1268|CNR1(15.365)	240|ALOX5(15.365)	5516|PPP2CB(15.365)	23541|SEC14L2(15.365)	1606|DGKA(15.365)	5579|PRKCB(15.365)	8435|SOAT2(15.365)	284904|SEC14L4(15.365)	1429|CRYZ(8.253)	730005|SEC14L6(8.253)	79001|VKORC1(8.253)	7299|TYR(8.253)	1728|NQO1(8.253)	1813|DRD2(5.859)	5074|PAWR(5.859)	6286|S100P(5.785)	3778|KCNMA1(5.785)	10381|TUBB3(3.351)	4790|NFKB1(3.351)	2100|ESR2(3.351)	4985|OPRD1(3.351)	10800|CYSLTR1(3.351)	5531|PPP4C(3.351)	203068|TUBB(3.351)	2099|ESR1(3.351)	7124|TNF(3.351)	10382|TUBB4A(3.351)	84617|TUBB6(3.351)	6037|RNASE3(3.351)	347688|TUBB8(3.351)	347733|TUBB2B(3.351)	4986|OPRK1(3.351)	4583|MUC2(3.351)	3567|IL5(3.351)	4988|OPRM1(3.351)	10383|TUBB4B(3.351)	7280|TUBB2A(3.351)	5582|PRKCG(3.351)	81027|TUBB1(3.351)	6257|RXRB(2.608)	1128|CHRM1(2.608)
Adenine	ID:617 From TCMID database	135|ADORA2A(122.778)	136|ADORA2B(122.778)	140|ADORA3(122.778)	134|ADORA1(122.778)	2203|FBP1(48.000)	5564|PRKAB1(48.000)	55902|ACSS2(48.000)	5426|POLE(48.000)	875|CBS(48.000)	54107|POLE3(48.000)	107|ADCY1(48.000)	1312|COMT(48.000)	5422|POLA1(48.000)	1633|DCK(48.000)	50484|RRM2B(48.000)	132|ADK(48.000)	27232|GNMT(48.000)	4860|PNP(48.000)	5144|PDE4D(48.000)	102724560|CBSL(48.000)	6241|RRM2(48.000)	5562|PRKAA1(48.000)	4143|MAT1A(48.000)	1385|CREB1(48.000)	84532|ACSS1(48.000)	5292|PIM1(48.000)	5836|PYGL(48.000)	5427|POLE2(48.000)	3094|HINT1(48.000)	4144|MAT2A(48.000)	262|AMD1(48.000)	2180|ACSL1(48.000)	5142|PDE4B(48.000)	5565|PRKAB2(48.000)	56655|POLE4(48.000)	6240|RRM1(48.000)	4507|MTAP(22.373)	5631|PRPS1(22.373)	6947|TCN1(15.365)	4594|MUT(15.365)	326625|MMAB(15.365)	4552|MTRR(15.365)	4548|MTR(15.365)	10560|SLC19A2(15.365)	8029|CUBN(15.365)	81693|AMN(15.365)	25974|MMACHC(15.365)	27010|TPK1(15.365)
Sucrose	ID:20430 From TCMID database	7852|CXCR4(48.000)	4791|NFKB2(48.000)	7124|TNF(48.000)	4318|MMP9(48.000)	3458|IFNG(48.000)	6323|SCN1A(5.785)	2555|GABRA2(5.785)	2563|GABRD(5.785)	55244|SLC47A1(5.785)	2560|GABRB1(5.785)	2246|FGF1(5.785)	2567|GABRG3(5.785)	1576|CYP3A4(5.785)	2564|GABRE(5.785)	2556|GABRA3(5.785)	1595|CYP51A1(5.785)	2266|FGG(5.785)	2565|GABRG1(5.785)	2568|GABRP(5.785)	2908|NR3C1(5.785)	2557|GABRA4(5.785)	2561|GABRB2(5.785)	1950|EGF(5.785)	762|CA4(5.785)	3757|KCNH2(5.785)	2249|FGF4(5.785)	2244|FGB(5.785)	55879|GABRQ(5.785)	1719|DHFR(5.785)	476|ATP1A1(5.785)	2562|GABRB3(5.785)	2558|GABRA5(5.785)	23569|PADI4(5.785)	2559|GABRA6(5.785)	2554|GABRA1(5.785)	2243|FGA(5.785)	2862|MLNR(5.785)	28234|SLCO1B3(5.785)	2566|GABRG2(5.785)	760|CA2(5.785)	4036|LRP2(5.785)	2897|GRIK1(5.785)	213|ALB(5.785)	5243|ABCB1(5.785)	2247|FGF2(5.785)	10599|SLCO1B1(5.785)	2548|GAA(3.351)	8972|MGAM(3.351)
Acetic Acid	ID:23287 From TCMID database	1719|DHFR(15.365)	5742|PTGS1(15.365)	5743|PTGS2(15.365)	185|AGTR1(15.365)	2350|FOLR2(8.253)	6470|SHMT1(8.253)	18|ABAT(8.253)	9120|SLC16A6(8.253)	23539|SLC16A8(8.253)	2618|GART(8.253)	5091|PC(8.253)	10797|MTHFD2(8.253)	6566|SLC16A1(8.253)	9194|SLC16A7(8.253)	5315|PKM(8.253)	5162|PDHB(8.253)	4548|MTR(8.253)	9121|SLC16A5(8.253)	4522|MTHFD1(8.253)	10840|ALDH1L1(8.253)	275|AMT(8.253)	6567|SLC16A2(8.253)	123263|MTFMT(8.253)	5313|PKLR(8.253)	471|ATIC(8.253)	200895|DHFRL1(8.253)	6472|SHMT2(8.253)	9122|SLC16A4(8.253)	2352|FOLR3(8.253)	10841|FTCD(8.253)	64902|AGXT2(8.253)	9123|SLC16A3(8.253)	7298|TYMS(8.253)	4524|MTHFR(8.253)	6715|SRD5A1(5.785)	2099|ESR1(5.785)	5740|PTGIS(5.785)	5734|PTGER4(5.785)	5241|PGR(5.785)	367|AR(5.785)	2908|NR3C1(5.785)	64805|P2RY12(5.785)	5739|PTGIR(5.785)	3156|HMGCR(5.785)	3689|ITGB2(5.785)	5732|PTGER2(5.785)	5733|PTGER3(5.785)	3290|HSD11B1(5.785)
Canavanine	ID:3063 From TCMID database	113451|AZIN2(80.882)	435|ASL(80.882)	4843|NOS2(80.882)	84889|SLC7A3(80.882)	445|ASS1(80.882)	6541|SLC7A1(80.882)	6545|SLC7A4(80.882)	4846|NOS3(80.882)	384|ARG2(80.882)	3162|HMOX1(55.444)	51686|OAZ3(55.444)	79814|AGMAT(55.444)	9314|KLF4(55.444)	2796|GNRH1(55.444)	383|ARG1(55.444)	51582|AZIN1(55.444)	5009|OTC(55.444)	6510|SLC1A5(23.000)	2806|GOT2(23.000)	84706|GPT2(23.000)	570|BAAT(23.000)	6470|SHMT1(23.000)	18|ABAT(23.000)	6505|SLC1A1(23.000)	6542|SLC7A2(23.000)	2653|GCSH(23.000)	23428|SLC7A8(23.000)	5471|PPAT(23.000)	91703|ACY3(23.000)	443|ASPA(23.000)	55699|IARS2(23.000)	2742|GLRA2(23.000)	211|ALAS1(23.000)	586|BCAT1(23.000)	23464|GCAT(23.000)	10991|SLC38A3(23.000)	7407|VARS(23.000)	9054|NFS1(23.000)	10166|SLC25A15(23.000)	6509|SLC1A4(23.000)	122622|ADSSL1(23.000)	7419|VDAC3(23.000)	2937|GSS(23.000)	440|ASNS(23.000)	8001|GLRA3(23.000)	55157|DARS2(23.000)	116444|GRIN3B(23.000)	51451|LCMT1(23.000)
Astragaloside Vii	ID:1942 From TCMID database	7852|CXCR4(48.000)	135|ADORA2A(15.365)	5422|POLA1(15.365)	136|ADORA2B(15.365)	140|ADORA3(15.365)	5423|POLB(15.365)	1786|DNMT1(15.365)	134|ADORA1(15.365)	1244|ABCC2(8.253)	2203|FBP1(8.253)	207|AKT1(8.253)	5564|PRKAB1(8.253)	90|ACVR1(8.253)	439|ASNA1(8.253)	157|ADRBK2(8.253)	55902|ACSS2(8.253)	94|ACVRL1(8.253)	107|ADCY1(8.253)	22978|NT5C2(8.253)	269|AMHR2(8.253)	10188|TNK2(8.253)	440|ASNS(8.253)	132|ADK(8.253)	27|ABL2(8.253)	156|ADRBK1(8.253)	3614|IMPDH1(8.253)	5144|PDE4D(8.253)	6524|SLC5A2(8.253)	5562|PRKAA1(8.253)	10060|ABCC9(8.253)	1385|CREB1(8.253)	84532|ACSS1(8.253)	5292|PIM1(8.253)	5836|PYGL(8.253)	25|ABL1(8.253)	10939|AFG3L2(8.253)	65061|CDK15(8.253)	3094|HINT1(8.253)	445|ASS1(8.253)	91|ACVR1B(8.253)	2180|ACSL1(8.253)	19|ABCA1(8.253)	5167|ENPP1(8.253)	5142|PDE4B(8.253)	8883|NAE1(8.253)	100|ADA(8.253)	5565|PRKAB2(8.253)	6523|SLC5A1(8.253)
[truncated: 206 more columns]
