# Supplementary material for: Pharmacological Network Reveals the Active Mechanism of Qi-Replenishing, Spleen-Strengthening, Phlegm-Dispelling, and Blood-Nourishing Fufang on Coronary Heart Disease
Source: Evid Based Complement Alternat Med. 2020 Dec 29;2020:1062325. doi: 10.1155/2020/1062325 (PMC7785359; doi:10.1155/2020/1062325)
Supplement: Supplementary Materials — Supplemental Table 1: the 222 components with target records for the four main Chinese medicinal herbs. Supplemental Table 2: the component-target pairs for the important components as screened by ADME. Supplemental Table 3: enriched GO functional terms for the 27 target genes. Supplemental Table 4: enriched KEGG pathways for the 27 target genes. [file 1062325.f1.zip › Supplementary files/Supplemental Table 2.xls]

## Sheet: salvia miltiorrhiza
molecule	gene ID	symbol	score
Magnesium Lithospermate B	3614	IMPDH1	23
Magnesium Lithospermate B	3615	IMPDH2	23
Neocryptotanshinone Ii	8600	TNFSF11	80.882
Neocryptotanshinone Ii	4790	NFKB1	80.882
Neocryptotanshinone Ii	2555	GABRA2	80.882
Neocryptotanshinone Ii	2563	GABRD	80.882
Neocryptotanshinone Ii	1137	CHRNA4	80.882
Neocryptotanshinone Ii	2560	GABRB1	80.882
Neocryptotanshinone Ii	2567	GABRG3	80.882
Neocryptotanshinone Ii	116444	GRIN3B	80.882
Neocryptotanshinone Ii	7124	TNF	80.882
Neocryptotanshinone Ii	1139	CHRNA7	80.882
Neocryptotanshinone Ii	2903	GRIN2A	80.882
Neocryptotanshinone Ii	1583	CYP11A1	80.882
Neocryptotanshinone Ii	6331	SCN5A	80.882
Neocryptotanshinone Ii	2564	GABRE	80.882
Neocryptotanshinone Ii	2556	GABRA3	80.882
Neocryptotanshinone Ii	2565	GABRG1	80.882
Neocryptotanshinone Ii	2263	FGFR2	80.882
Neocryptotanshinone Ii	2568	GABRP	80.882
Neocryptotanshinone Ii	2891	GRIA2	80.882
Neocryptotanshinone Ii	1003	CDH5	80.882
Neocryptotanshinone Ii	2557	GABRA4	80.882
Neocryptotanshinone Ii	2561	GABRB2	80.882
Neocryptotanshinone Ii	2905	GRIN2C	80.882
Neocryptotanshinone Ii	2904	GRIN2B	80.882
Neocryptotanshinone Ii	55879	GABRQ	80.882
Neocryptotanshinone Ii	5742	PTGS1	80.882
Neocryptotanshinone Ii	5004	ORM1	80.882
Neocryptotanshinone Ii	5743	PTGS2	80.882
Neocryptotanshinone Ii	2562	GABRB3	80.882
Neocryptotanshinone Ii	116443	GRIN3A	80.882
Neocryptotanshinone Ii	2558	GABRA5	80.882
Neocryptotanshinone Ii	2559	GABRA6	80.882
Neocryptotanshinone Ii	2554	GABRA1	80.882
Neocryptotanshinone Ii	2566	GABRG2	80.882
Neocryptotanshinone Ii	2906	GRIN2D	80.882
Neocryptotanshinone Ii	89832	CHRFAM7A	80.882
Neocryptotanshinone Ii	51185	CRBN	80.882
Neocryptotanshinone Ii	1588	CYP19A1	80.882
Neocryptotanshinone Ii	5005	ORM2	80.882
Neocryptotanshinone Ii	2898	GRIK2	80.882
Neocryptotanshinone Ii	2902	GRIN1	80.882
Neocryptotanshinone Ii	2255	FGF10	55.444
Neocryptotanshinone Ii	51176	LEF1	55.444
Neocryptotanshinone Ii	8862	APLN	55.444
Neocryptotanshinone Ii	8792	TNFRSF11A	55.444
Neocryptotanshinone Ii	8626	TP63	55.444
Neocryptotanshinone Ii	147	ADRA1B	55.444
Neocryptotanshinone Ii	2260	FGFR1	55.444
Neocryptotanshinone Ii	2053	EPHX2	55.444
Neocryptotanshinone Ii	6324	SCN1B	55.444
Neocryptotanshinone Ii	4049	LTA	55.444
Neocryptotanshinone Ii	55584	CHRNA9	55.444
Neocryptotanshinone Ii	6256	RXRA	55.444
Neocryptotanshinone Ii	8710	SERPINB7	55.444
Neocryptotanshinone Ii	2899	GRIK3	23
Neocryptotanshinone Ii	1638	DCT	22.373
Neocryptotanshinone Ii	2203	FBP1	22.373
Neocryptotanshinone Ii	6327	SCN2B	22.373
Neocryptotanshinone Ii	5970	RELA	22.373
Neocryptotanshinone Ii	23171	GPD1L	22.373
Neocryptotanshinone Ii	8091	HMGA2	22.373
Neocryptotanshinone Ii	8941	CDK5R2	22.373
Neocryptotanshinone Ii	57447	NDRG2	22.373
Neocryptotanshinone Ii	2893	GRIA4	22.373
Neocryptotanshinone Ii	5077	PAX3	22.373
Neocryptotanshinone Ii	10135	NAMPT	22.373
Neocryptotanshinone Ii	336	APOA2	22.373
Neocryptotanshinone Ii	85458	DIXDC1	22.373
Neocryptotanshinone Ii	28984	RGCC	22.373
Neocryptotanshinone Ii	10507	SEMA4D	22.373
Neocryptotanshinone Ii	1435	CSF1	22.373
Neocryptotanshinone Ii	726	CAPN5	22.373
Neocryptotanshinone Ii	8644	AKR1C3	22.373
Neocryptotanshinone Ii	972	CD74	22.373
Neocryptotanshinone Ii	55800	SCN3B	22.373
Neocryptotanshinone Ii	252995	FNDC5	22.373
Neocryptotanshinone Ii	89797	NAV2	22.373
Neocryptotanshinone Ii	4781	NFIB	22.373
Neocryptotanshinone Ii	3263	HPX	22.373
Neocryptotanshinone Ii	348110	ARPIN	22.373
Neocryptotanshinone Ii	4282	MIF	22.373
Neocryptotanshinone Ii	6591	SNAI2	22.373
Neocryptotanshinone Ii	552	AVPR1A	22.373
Neocryptotanshinone Ii	2890	GRIA1	22.373
Neocryptotanshinone Ii	4824	NKX3-1	22.373
Neocryptotanshinone Ii	6615	SNAI1	22.373
Neocryptotanshinone Ii	1544	CYP1A2	22.373
Neocryptotanshinone Ii	356	FASLG	22.373
Neocryptotanshinone Ii	6352	CCL5	22.373
Neocryptotanshinone Ii	287	ANK2	22.373
Neocryptotanshinone Ii	3958	LGALS3	22.373
Neocryptotanshinone Ii	9314	KLF4	22.373
Neocryptotanshinone Ii	7468	WHSC1	22.373
Neocryptotanshinone Ii	7122	CLDN5	22.373
Neocryptotanshinone Ii	2535	FZD2	22.373
Neocryptotanshinone Ii	284207	METRNL	22.373
Neocryptotanshinone Ii	5601	MAPK9	22.373
Neocryptotanshinone Ii	3398	ID2	22.373
Neocryptotanshinone Ii	10859	LILRB1	22.373
Neocryptotanshinone Ii	3071	NCKAP1L	22.373
Neocryptotanshinone Ii	2252	FGF7	22.373
Neocryptotanshinone Ii	9210	BMP15	22.373
Neocryptotanshinone Ii	7098	TLR3	22.373
Neocryptotanshinone Ii	2099	ESR1	22.373
Neocryptotanshinone Ii	7054	TH	22.373
Neocryptotanshinone Ii	64321	SOX17	22.373
Neocryptotanshinone Ii	53335	BCL11A	22.373
Neocryptotanshinone Ii	4883	NPR3	22.373
Neocryptotanshinone Ii	4208	MEF2C	22.373
Neocryptotanshinone Ii	5607	MAP2K5	22.373
Neocryptotanshinone Ii	3736	KCNA1	22.373
Neocryptotanshinone Ii	27102	EIF2AK1	22.373
Neocryptotanshinone Ii	3553	IL1B	22.373
Neocryptotanshinone Ii	23405	DICER1	22.373
Neocryptotanshinone Ii	5740	PTGIS	22.373
Neocryptotanshinone Ii	6469	SHH	22.373
Neocryptotanshinone Ii	25928	SOSTDC1	22.373
Neocryptotanshinone Ii	6336	SCN10A	22.373
Neocryptotanshinone Ii	8737	RIPK1	22.373
Neocryptotanshinone Ii	6317	SERPINB3	22.373
Neocryptotanshinone Ii	6678	SPARC	22.373
Neocryptotanshinone Ii	50943	FOXP3	22.373
Neocryptotanshinone Ii	847	CAT	22.373
Neocryptotanshinone Ii	1191	CLU	22.373
Neocryptotanshinone Ii	8492	PRSS12	22.373
Neocryptotanshinone Ii	9294	S1PR2	22.373
Neocryptotanshinone Ii	2672	GFI1	22.373
Neocryptotanshinone Ii	136	ADORA2B	22.373
Neocryptotanshinone Ii	4889	NPY5R	22.373
Neocryptotanshinone Ii	8772	FADD	22.373
Neocryptotanshinone Ii	5241	PGR	22.373
Neocryptotanshinone Ii	284	ANGPT1	22.373
Neocryptotanshinone Ii	26585	GREM1	22.373
Neocryptotanshinone Ii	3265	HRAS	22.373
Neocryptotanshinone Ii	57493	HEG1	22.373
Neocryptotanshinone Ii	55252	ASXL2	22.373
Neocryptotanshinone Ii	5195	PEX14	22.373
Neocryptotanshinone Ii	10716	TBR1	22.373
Neocryptotanshinone Ii	3358	HTR2C	22.373
Neocryptotanshinone Ii	7472	WNT2	22.373
Neocryptotanshinone Ii	54361	WNT4	22.373
Neocryptotanshinone Ii	3557	IL1RN	22.373
Neocryptotanshinone Ii	146	ADRA1D	22.373
Neocryptotanshinone Ii	57216	VANGL2	22.373
Neocryptotanshinone Ii	727	C5	22.373
Neocryptotanshinone Ii	1813	DRD2	22.373
Neocryptotanshinone Ii	3037	HAS2	22.373
Neocryptotanshinone Ii	26052	DNM3	22.373
Neocryptotanshinone Ii	5624	PROC	22.373
Neocryptotanshinone Ii	2208	FCER2	22.373
Neocryptotanshinone Ii	3952	LEP	22.373
Neocryptotanshinone Ii	6714	SRC	22.373
Neocryptotanshinone Ii	7482	WNT2B	22.373
Neocryptotanshinone Ii	551	AVP	22.373
Neocryptotanshinone Ii	8851	CDK5R1	22.373
Neocryptotanshinone Ii	3458	IFNG	22.373
Neocryptotanshinone Ii	1141	CHRNB2	22.373
Neocryptotanshinone Ii	1950	EGF	22.373
Neocryptotanshinone Ii	776	CACNA1D	22.373
Neocryptotanshinone Ii	8111	GPR68	22.373
Neocryptotanshinone Ii	26228	STAP1	22.373
Neocryptotanshinone Ii	6532	SLC6A4	22.373
Neocryptotanshinone Ii	7042	TGFB2	22.373
Neocryptotanshinone Ii	114609	TIRAP	22.373
Neocryptotanshinone Ii	9475	ROCK2	22.373
Neocryptotanshinone Ii	10974	ADIRF	22.373
Neocryptotanshinone Ii	624	BDKRB2	22.373
Neocryptotanshinone Ii	4761	NEUROD2	22.373
Neocryptotanshinone Ii	43	ACHE	22.373
Neocryptotanshinone Ii	288	ANK3	22.373
Neocryptotanshinone Ii	23630	KCNE5	22.373
Neocryptotanshinone Ii	8292	COLQ	22.373
Neocryptotanshinone Ii	79148	MMP28	22.373
Neocryptotanshinone Ii	4092	SMAD7	22.373
Neocryptotanshinone Ii	7389	UROD	22.373
Neocryptotanshinone Ii	3630	INS	22.373
Neocryptotanshinone Ii	1636	ACE	22.373
Neocryptotanshinone Ii	9678	PHF14	22.373
Neocryptotanshinone Ii	6330	SCN4B	22.373
Neocryptotanshinone Ii	2264	FGFR4	22.373
Neocryptotanshinone Ii	632	BGLAP	22.373
Neocryptotanshinone Ii	1815	DRD4	22.373
Neocryptotanshinone Ii	2737	GLI3	22.373
Neocryptotanshinone Ii	29882	ANAPC2	22.373
Neocryptotanshinone Ii	7481	WNT11	22.373
Neocryptotanshinone Ii	1580	CYP4B1	22.373
Neocryptotanshinone Ii	6770	STAR	22.373
Neocryptotanshinone Ii	23400	ATP13A2	22.373
Neocryptotanshinone Ii	3292	HSD17B1	22.373
Neocryptotanshinone Ii	537	ATP6AP1	22.373
Neocryptotanshinone Ii	247	ALOX15B	22.373
Neocryptotanshinone Ii	859	CAV3	22.373
Neocryptotanshinone Ii	3586	IL10	22.373
Neocryptotanshinone Ii	109	ADCY3	22.373
Neocryptotanshinone Ii	1006	CDH8	22.373
Neocryptotanshinone Ii	991	CDC20	22.373
Neocryptotanshinone Ii	8648	NCOA1	22.373
Neocryptotanshinone Ii	6263	RYR3	22.373
Neocryptotanshinone Ii	3569	IL6	22.373
Neocryptotanshinone Ii	6093	ROCK1	22.373
Neocryptotanshinone Ii	87178	PNPT1	22.373
Neocryptotanshinone Ii	167127	UGT3A2	22.373
Neocryptotanshinone Ii	5455	POU3F3	22.373
Neocryptotanshinone Ii	120892	LRRK2	22.373
Neocryptotanshinone Ii	3741	KCNA5	22.373
Neocryptotanshinone Ii	2901	GRIK5	22.373
Neocryptotanshinone Ii	2900	GRIK4	22.373
Neocryptotanshinone Ii	598	BCL2L1	22.373
Neocryptotanshinone Ii	4878	NPPA	22.373
Neocryptotanshinone Ii	7128	TNFAIP3	22.373
Neocryptotanshinone Ii	3249	HPN	22.373
Neocryptotanshinone Ii	4297	KMT2A	22.373
Neocryptotanshinone Ii	2892	GRIA3	22.373
Neocryptotanshinone Ii	668	FOXL2	22.373
Neocryptotanshinone Ii	64127	NOD2	22.373
Neocryptotanshinone Ii	8321	FZD1	22.373
Neocryptotanshinone Ii	652	BMP4	22.373
Neocryptotanshinone Ii	191	AHCY	22.373
Neocryptotanshinone Ii	6716	SRD5A2	22.373
Neocryptotanshinone Ii	335	APOA1	22.373
Neocryptotanshinone Ii	998	CDC42	22.373
Neocryptotanshinone Ii	3565	IL4	22.373
Neocryptotanshinone Ii	93100	NAPRT	22.373
Neocryptotanshinone Ii	3551	IKBKB	22.373
Neocryptotanshinone Ii	4057	LTF	22.373
Neocryptotanshinone Ii	3620	IDO1	22.373
Neocryptotanshinone Ii	2122	MECOM	22.373
Neocryptotanshinone Ii	5454	POU3F2	22.373
Neocryptotanshinone Ii	177	AGER	22.373
Neocryptotanshinone Ii	1499	CTNNB1	22.373
Neocryptotanshinone Ii	2243	FGA	22.373
Neocryptotanshinone Ii	6622	SNCA	22.373
Neocryptotanshinone Ii	1812	DRD1	22.373
Neocryptotanshinone Ii	1524	CX3CR1	22.373
Neocryptotanshinone Ii	2261	FGFR3	22.373
Neocryptotanshinone Ii	23135	KDM6B	22.373
Neocryptotanshinone Ii	6262	RYR2	22.373
Neocryptotanshinone Ii	10814	CPLX2	22.373
Neocryptotanshinone Ii	947	CD34	22.373
Neocryptotanshinone Ii	5071	PARK2	22.373
Neocryptotanshinone Ii	246	ALOX15	22.373
Neocryptotanshinone Ii	6431	SRSF6	22.373
Neocryptotanshinone Ii	301	ANXA1	22.373
Neocryptotanshinone Ii	796	CALCA	22.373
Neocryptotanshinone Ii	53834	FGFRL1	22.373
Neocryptotanshinone Ii	3784	KCNQ1	22.373
Neocryptotanshinone Ii	845	CASQ2	22.373
Neocryptotanshinone Ii	2702	GJA5	22.373
Neocryptotanshinone Ii	5744	PTHLH	22.373
Neocryptotanshinone Ii	2897	GRIK1	22.373
Neocryptotanshinone Ii	6662	SOX9	22.373
Neocryptotanshinone Ii	128506	OCSTAMP	22.373
Neocryptotanshinone Ii	5830	PEX5	22.373
Neocryptotanshinone Ii	5155	PDGFB	22.373
Neocryptotanshinone Ii	54658	UGT1A1	22.373
Neocryptotanshinone Ii	355	FAS	22.373
Neocryptotanshinone Ii	3814	KISS1	22.373
Neocryptotanshinone Ii	2917	GRM7	22.373
Neocryptotanshinone Ii	1543	CYP1A1	22.373
Neocryptotanshinone Ii	2353	FOS	22.373
Neocryptotanshinone Ii	63976	PRDM16	22.373
Neocryptotanshinone Ii	1594	CYP27B1	22.373
Neocryptotanshinone Ii	3293	HSD17B3	22.373
Neocryptotanshinone Ii	140706	CCM2L	22.373
Heteratisine	1131	CHRM3	48
Heteratisine	1576	CYP3A4	48
Heteratisine	1128	CHRM1	48
Heteratisine	23569	PADI4	48
Heteratisine	1129	CHRM2	48
Heteratisine	5243	ABCB1	23
Daphneolone	2099	ESR1	48
Daphneolone	240	ALOX5	48
Tanshinone Ii A	57053	CHRNA10	80.882
Tanshinone Iib	1131	CHRM3	23
Tanshinone Iib	1128	CHRM1	23
Tanshinone Iib	1129	CHRM2	23
Tanshinone Iib	1132	CHRM4	23

## Sheet: astragalus mongholicus
molecule	gene ID	symbol	score
Astragaloside Ii	55244	SLC47A1	48
Astragaloside Ii	1576	CYP3A4	48
Astragaloside Ii	1595	CYP51A1	48
Astragaloside Ii	3757	KCNH2	48
Astragaloside Ii	476	ATP1A1	48
Astragaloside Ii	2862	MLNR	48
Astragaloside Ii	28234	SLCO1B3	48
Astragaloside Ii	213	ALB	48
Astragaloside Ii	5243	ABCB1	48
Astragaloside Ii	10599	SLCO1B1	48
Soyasapogenol B	2099	ESR1	122.778
Soyasapogenol B	5241	PGR	122.778
Soyasapogenol B	367	AR	48
Soyasapogenol B	2908	NR3C1	48
Soyasapogenol B	301	ANXA1	48
