# Supplementary material for: Pharmacological Network Reveals the Active Mechanism of Qi-Replenishing, Spleen-Strengthening, Phlegm-Dispelling, and Blood-Nourishing Fufang on Coronary Heart Disease
Source: Evid Based Complement Alternat Med. 2020 Dec 29;2020:1062325. doi: 10.1155/2020/1062325 (PMC7785359; doi:10.1155/2020/1062325)
Supplement: Supplementary Materials — Supplemental Table 1: the 222 components with target records for the four main Chinese medicinal herbs. Supplemental Table 2: the component-target pairs for the important components as screened by ADME. Supplemental Table 3: enriched GO functional terms for the 27 target genes. Supplemental Table 4: enriched KEGG pathways for the 27 target genes. [file 1062325.f1.zip › Supplementary files/Supplemental Table 3.xls]

## Sheet: ClueGO Results
GOID	GOTerm	Ontology Source	Term PValue	Term PValue Corrected with Bonferroni step down	Group PValue	Group PValue Corrected with Bonferroni step down	GOLevels	GOGroups	% Associated Genes	Nr. Genes	Associated Genes Found
GO:0051384	response to glucocorticoid	GO_BiologicalProcess-GOA_23.02.2017_10h01	6.04411e-16	5.4397e-14	6.04411e-16	5.4397e-15	[6, 7]	Group00	6.50888	11	[APOA2, BGLAP, FAS, FOS, IL10, IL1RN, IL6, NR3C1, PTGS2, TNF, UGT1A1]
GO:0006778	porphyrin-containing compound metabolic process	GO_BiologicalProcess-GOA_23.02.2017_10h01	3.18133e-05	0.00038176	1.15932e-07	1.15932e-07	[4, 5]	Group01	7.5	3	[CYP1A1, CYP1A2, UGT1A1]
GO:0006721	terpenoid metabolic process	GO_BiologicalProcess-GOA_23.02.2017_10h01	2.27341e-08	1.27311e-06	1.15932e-07	1.15932e-07	[5, 6]	Group01	5.08475	6	[APOA1, APOA2, CYP1A1, CYP1A2, CYP3A4, UGT1A1]
GO:0032355	response to estradiol	GO_BiologicalProcess-GOA_23.02.2017_10h01	7.1786e-08	3.15858e-06	3.46832e-09	6.93664e-09	[4, 5]	Group02	4.1958	6	[CYP1A2, IL10, IL6, LEP, PTGS2, UGT1A1]
GO:0045598	regulation of fat cell differentiation	GO_BiologicalProcess-GOA_23.02.2017_10h01	1.03275e-06	2.8917e-05	3.46832e-09	6.93664e-09	[4, 5, 6]	Group02	4.16667	5	[IL6, INS, LEP, PTGS2, TNF]
GO:0071392	cellular response to estradiol stimulus	GO_BiologicalProcess-GOA_23.02.2017_10h01	2.722e-05	0.00038108	3.46832e-09	6.93664e-09	[5, 6]	Group02	7.89474	3	[IL10, IL6, UGT1A1]
GO:0032612	interleukin-1 production	GO_BiologicalProcess-GOA_23.02.2017_10h01	3.95166e-06	9.87915e-05	1.37653e-12	6.88265e-12	[4]	Group03	5.71429	4	[APOA1, IFNG, IL10, IL1B]
GO:0034114	regulation of heterotypic cell-cell adhesion	GO_BiologicalProcess-GOA_23.02.2017_10h01	1.2244e-10	9.79516e-09	1.37653e-12	6.88265e-12	[4, 5, 6]	Group03	23.8095	5	[APOA1, IL10, IL1B, IL1RN, TNF]
GO:0001960	negative regulation of cytokine-mediated signaling pathway	GO_BiologicalProcess-GOA_23.02.2017_10h01	7.87693e-07	2.52062e-05	1.37653e-12	6.88265e-12	[4, 5, 6, 7, 8]	Group03	8.51064	4	[APOA1, CCL5, IL1RN, IL6]
GO:0034115	negative regulation of heterotypic cell-cell adhesion	GO_BiologicalProcess-GOA_23.02.2017_10h01	5.47501e-07	1.97101e-05	1.37653e-12	6.88265e-12	[5, 6, 7, 8, 9]	Group03	27.2727	3	[APOA1, IL10, IL1RN]
GO:0050710	negative regulation of cytokine secretion	GO_BiologicalProcess-GOA_23.02.2017_10h01	1.23638e-08	7.4183e-07	1.37653e-12	6.88265e-12	[4, 5, 6, 7, 8, 9, 10, 11]	Group03	10	5	[APOA1, APOA2, IL10, IL6, TNF]
GO:0032615	interleukin-12 production	GO_BiologicalProcess-GOA_23.02.2017_10h01	1.18925e-06	3.21098e-05	1.07936e-15	8.63486e-15	[4]	Group04	7.69231	4	[IFNG, IL10, LEP, NFKB1]
GO:0032760	positive regulation of tumor necrosis factor production	GO_BiologicalProcess-GOA_23.02.2017_10h01	0.000113394	0.000340182	1.07936e-15	8.63486e-15	[5, 6, 7]	Group04	4.91803	3	[CLU, IFNG, LEP]
GO:0050810	regulation of steroid biosynthetic process	GO_BiologicalProcess-GOA_23.02.2017_10h01	2.65134e-08	1.40521e-06	1.07936e-15	8.63486e-15	[5, 6, 7]	Group04	8.62069	5	[IFNG, IL1B, LEP, NFKB1, TNF]
GO:0030301	cholesterol transport	GO_BiologicalProcess-GOA_23.02.2017_10h01	1.63619e-07	6.54475e-06	1.07936e-15	8.63486e-15	[6, 7]	Group04	6.0241	5	[APOA1, APOA2, CLU, LEP, NFKB1]
GO:0045639	positive regulation of myeloid cell differentiation	GO_BiologicalProcess-GOA_23.02.2017_10h01	9.42191e-06	0.000188438	1.07936e-15	8.63486e-15	[4, 5, 6, 7, 8, 9, 10]	Group04	4.5977	4	[FOS, IFNG, LEP, TNF]
GO:0042531	positive regulation of tyrosine phosphorylation of STAT protein	GO_BiologicalProcess-GOA_23.02.2017_10h01	4.38386e-08	2.06042e-06	1.07936e-15	8.63486e-15	[7, 8, 9, 10, 11, 12]	Group04	7.8125	5	[CCL5, IFNG, IL4, IL6, LEP]
GO:0043255	regulation of carbohydrate biosynthetic process	GO_BiologicalProcess-GOA_23.02.2017_10h01	1.28127e-05	0.000217816	4.76854e-13	2.86112e-12	[4, 5, 6]	Group05	4.25532	4	[IL6, INS, LEP, NFKB1]
GO:0045598	regulation of fat cell differentiation	GO_BiologicalProcess-GOA_23.02.2017_10h01	1.03275e-06	2.8917e-05	4.76854e-13	2.86112e-12	[4, 5, 6]	Group05	4.16667	5	[IL6, INS, LEP, PTGS2, TNF]
GO:1900407	regulation of cellular response to oxidative stress	GO_BiologicalProcess-GOA_23.02.2017_10h01	6.41404e-06	0.000147523	4.76854e-13	2.86112e-12	[4, 5, 6]	Group05	5.06329	4	[CLU, IL6, INS, TNF]
GO:0010677	negative regulation of cellular carbohydrate metabolic process	GO_BiologicalProcess-GOA_23.02.2017_10h01	8.3174e-05	0.00041587	4.76854e-13	2.86112e-12	[4, 5, 6, 7]	Group05	5.45455	3	[IL6, INS, UGT1A1]
GO:0071392	cellular response to estradiol stimulus	GO_BiologicalProcess-GOA_23.02.2017_10h01	2.722e-05	0.00038108	4.76854e-13	2.86112e-12	[5, 6]	Group05	7.89474	3	[IL10, IL6, UGT1A1]
GO:0006953	acute-phase response	GO_BiologicalProcess-GOA_23.02.2017_10h01	2.67598e-12	2.27459e-10	4.76854e-13	2.86112e-12	[6]	Group05	12.069	7	[IL1B, IL1RN, IL6, INS, PTGS2, TNF, UGT1A1]
GO:0071385	cellular response to glucocorticoid stimulus	GO_BiologicalProcess-GOA_23.02.2017_10h01	0.000124859	0.000249718	4.76854e-13	2.86112e-12	[7, 8]	Group05	4.7619	3	[IL6, NR3C1, UGT1A1]
GO:0019915	lipid storage	GO_BiologicalProcess-GOA_23.02.2017_10h01	7.25999e-10	5.29979e-08	2.00528e-11	8.02112e-11	[3, 4]	Group06	8.95522	6	[APOA1, IL1B, IL6, LEP, NFKB1, TNF]
GO:1905952	regulation of lipid localization	GO_BiologicalProcess-GOA_23.02.2017_10h01	1.7069e-09	1.17776e-07	2.00528e-11	8.02112e-11	[3, 4]	Group06	4.8951	7	[APOA1, APOA2, IL1B, IL6, LEP, NFKB1, TNF]
GO:1905953	negative regulation of lipid localization	GO_BiologicalProcess-GOA_23.02.2017_10h01	6.37762e-09	3.95412e-07	2.00528e-11	8.02112e-11	[2, 3, 4, 5]	Group06	11.3636	5	[APOA2, IL6, LEP, NFKB1, TNF]
GO:0032368	regulation of lipid transport	GO_BiologicalProcess-GOA_23.02.2017_10h01	7.33164e-07	2.41944e-05	2.00528e-11	8.02112e-11	[4, 5, 6]	Group06	4.46429	5	[APOA1, APOA2, IL1B, LEP, NFKB1]
GO:0019218	regulation of steroid metabolic process	GO_BiologicalProcess-GOA_23.02.2017_10h01	5.83742e-13	5.07856e-11	2.00528e-11	8.02112e-11	[5, 6]	Group06	9.1954	8	[APOA1, APOA2, IFNG, IL1B, LEP, NFKB1, TNF, UGT1A1]
GO:0050996	positive regulation of lipid catabolic process	GO_BiologicalProcess-GOA_23.02.2017_10h01	1.06806e-05	0.000202931	2.00528e-11	8.02112e-11	[4, 5, 6, 7]	Group06	10.7143	3	[APOA1, APOA2, IL1B]
GO:0032760	positive regulation of tumor necrosis factor production	GO_BiologicalProcess-GOA_23.02.2017_10h01	0.000113394	0.000340182	2.00528e-11	8.02112e-11	[5, 6, 7]	Group06	4.91803	3	[CLU, IFNG, LEP]
GO:0030301	cholesterol transport	GO_BiologicalProcess-GOA_23.02.2017_10h01	1.63619e-07	6.54475e-06	2.00528e-11	8.02112e-11	[6, 7]	Group06	6.0241	5	[APOA1, APOA2, CLU, LEP, NFKB1]
GO:0043691	reverse cholesterol transport	GO_BiologicalProcess-GOA_23.02.2017_10h01	3.18878e-06	8.29083e-05	2.00528e-11	8.02112e-11	[7, 8]	Group06	15.7895	3	[APOA1, APOA2, CLU]
GO:0043370	regulation of CD4-positive, alpha-beta T cell differentiation	GO_BiologicalProcess-GOA_23.02.2017_10h01	2.50971e-05	0.000376456	3.83207e-10	1.14962e-09	[8, 9, 10, 11, 12, 13]	Group07	8.10811	3	[IFNG, IL4, IL6]
GO:0032642	regulation of chemokine production	GO_BiologicalProcess-GOA_23.02.2017_10h01	1.707e-09	1.16076e-07	3.83207e-10	1.14962e-09	[4, 5]	Group07	7.79221	6	[IFNG, IL10, IL1B, IL4, IL6, TNF]
GO:0002637	regulation of immunoglobulin production	GO_BiologicalProcess-GOA_23.02.2017_10h01	2.21493e-08	1.26251e-06	3.83207e-10	1.14962e-09	[4, 5, 6]	Group07	8.92857	5	[IFNG, IL10, IL4, IL6, TNF]
GO:0002639	positive regulation of immunoglobulin production	GO_BiologicalProcess-GOA_23.02.2017_10h01	2.94578e-05	0.000382952	3.83207e-10	1.14962e-09	[4, 5, 6, 7]	Group07	7.69231	3	[IFNG, IL4, IL6]
GO:0002822	regulation of adaptive immune response based on somatic recombination of immune receptors built from immunoglobulin superfamily domains	GO_BiologicalProcess-GOA_23.02.2017_10h01	3.36984e-08	1.71862e-06	3.83207e-10	1.14962e-09	[5, 6]	Group07	4.7619	6	[IFNG, IL10, IL1B, IL4, IL6, TNF]
GO:0002708	positive regulation of lymphocyte mediated immunity	GO_BiologicalProcess-GOA_23.02.2017_10h01	1.12051e-07	4.81818e-06	3.83207e-10	1.14962e-09	[5, 6, 7]	Group07	6.49351	5	[IFNG, IL1B, IL4, IL6, TNF]
GO:0042108	positive regulation of cytokine biosynthetic process	GO_BiologicalProcess-GOA_23.02.2017_10h01	5.53527e-08	2.49087e-06	3.83207e-10	1.14962e-09	[4, 5, 6, 7, 8]	Group07	7.46269	5	[APOA2, IFNG, IL1B, IL4, TNF]
GO:0044130	negative regulation of growth of symbiont in host	GO_BiologicalProcess-GOA_23.02.2017_10h01	3.18878e-06	8.29083e-05	3.83207e-10	1.14962e-09	[4, 5, 6, 7, 8]	Group07	15.7895	3	[IFNG, IL10, TNF]
GO:0045348	positive regulation of MHC class II biosynthetic process	GO_BiologicalProcess-GOA_23.02.2017_10h01	2.79306e-07	1.0893e-05	3.83207e-10	1.14962e-09	[5, 6, 7]	Group07	33.3333	3	[IFNG, IL10, IL4]
GO:0045639	positive regulation of myeloid cell differentiation	GO_BiologicalProcess-GOA_23.02.2017_10h01	9.42191e-06	0.000188438	3.83207e-10	1.14962e-09	[4, 5, 6, 7, 8, 9, 10]	Group07	4.5977	4	[FOS, IFNG, LEP, TNF]
GO:0072577	endothelial cell apoptotic process	GO_BiologicalProcess-GOA_23.02.2017_10h01	6.24613e-05	0.000562151	3.83207e-10	1.14962e-09	[7]	Group07	6	3	[IL10, IL4, TNF]
GO:0002889	regulation of immunoglobulin mediated immune response	GO_BiologicalProcess-GOA_23.02.2017_10h01	7.2142e-07	2.45283e-05	3.83207e-10	1.14962e-09	[7, 8]	Group07	8.69565	4	[IFNG, IL10, IL4, TNF]
GO:0002294	CD4-positive, alpha-beta T cell differentiation involved in immune response	GO_BiologicalProcess-GOA_23.02.2017_10h01	6.62964e-05	0.000530371	3.83207e-10	1.14962e-09	[3, 4, 5, 6, 7, 8, 9, 10, 11, 12, 13]	Group07	5.88235	3	[IFNG, IL4, IL6]
GO:0045670	regulation of osteoclast differentiation	GO_BiologicalProcess-GOA_23.02.2017_10h01	4.74417e-08	2.18232e-06	3.83207e-10	1.14962e-09	[6, 7, 8, 9, 10, 11]	Group07	7.69231	5	[BGLAP, FOS, IFNG, IL4, TNF]
GO:0045672	positive regulation of osteoclast differentiation	GO_BiologicalProcess-GOA_23.02.2017_10h01	6.62615e-06	0.000145775	3.83207e-10	1.14962e-09	[6, 7, 8, 9, 10, 11, 12]	Group07	12.5	3	[FOS, IFNG, TNF]
GO:0032615	interleukin-12 production	GO_BiologicalProcess-GOA_23.02.2017_10h01	1.18925e-06	3.21098e-05	2.06068e-14	1.44248e-13	[4]	Group08	7.69231	4	[IFNG, IL10, LEP, NFKB1]
GO:0032635	interleukin-6 production	GO_BiologicalProcess-GOA_23.02.2017_10h01	2.51489e-08	1.35804e-06	2.06068e-14	1.44248e-13	[4]	Group08	5	6	[IFNG, IL10, IL1B, IL6, LEP, TNF]
GO:0032768	regulation of monooxygenase activity	GO_BiologicalProcess-GOA_23.02.2017_10h01	6.61671e-10	4.96253e-08	2.06068e-14	1.44248e-13	[4, 5]	Group08	9.09091	6	[IFNG, IL1B, INS, LEP, NFKB1, TNF]
GO:0046165	alcohol biosynthetic process	GO_BiologicalProcess-GOA_23.02.2017_10h01	6.63206e-10	4.90773e-08	2.06068e-14	1.44248e-13	[5]	Group08	5.6	7	[APOA1, CYP3A4, IFNG, IL1B, LEP, NFKB1, TNF]
GO:0002706	regulation of lymphocyte mediated immunity	GO_BiologicalProcess-GOA_23.02.2017_10h01	5.588e-10	4.24688e-08	2.06068e-14	1.44248e-13	[5, 6]	Group08	5.7377	7	[IFNG, IL10, IL1B, IL4, IL6, LEP, TNF]
GO:0033619	membrane protein proteolysis	GO_BiologicalProcess-GOA_23.02.2017_10h01	2.42534e-08	1.33394e-06	2.06068e-14	1.44248e-13	[5, 6]	Group08	8.77193	5	[IFNG, IL10, IL1B, NFKB1, TNF]
GO:1900182	positive regulation of protein localization to nucleus	GO_BiologicalProcess-GOA_23.02.2017_10h01	1.20038e-09	8.52272e-08	2.06068e-14	1.44248e-13	[3, 4, 5, 6, 7, 8]	Group08	5.14706	7	[IFNG, IL1B, IL6, INS, LEP, PTGS2, TNF]
GO:0032760	positive regulation of tumor necrosis factor production	GO_BiologicalProcess-GOA_23.02.2017_10h01	0.000113394	0.000340182	2.06068e-14	1.44248e-13	[5, 6, 7]	Group08	4.91803	3	[CLU, IFNG, LEP]
GO:0042036	negative regulation of cytokine biosynthetic process	GO_BiologicalProcess-GOA_23.02.2017_10h01	1.19006e-05	0.000214211	2.06068e-14	1.44248e-13	[4, 5, 6, 7, 8]	Group08	10.3448	3	[IL10, IL6, NFKB1]
GO:0044130	negative regulation of growth of symbiont in host	GO_BiologicalProcess-GOA_23.02.2017_10h01	3.18878e-06	8.29083e-05	2.06068e-14	1.44248e-13	[4, 5, 6, 7, 8]	Group08	15.7895	3	[IFNG, IL10, TNF]
GO:0045348	positive regulation of MHC class II biosynthetic process	GO_BiologicalProcess-GOA_23.02.2017_10h01	2.79306e-07	1.0893e-05	2.06068e-14	1.44248e-13	[5, 6, 7]	Group08	33.3333	3	[IFNG, IL10, IL4]
GO:0050810	regulation of steroid biosynthetic process	GO_BiologicalProcess-GOA_23.02.2017_10h01	2.65134e-08	1.40521e-06	2.06068e-14	1.44248e-13	[5, 6, 7]	Group08	8.62069	5	[IFNG, IL1B, LEP, NFKB1, TNF]
GO:0071222	cellular response to lipopolysaccharide	GO_BiologicalProcess-GOA_23.02.2017_10h01	6.44692e-09	3.93262e-07	2.06068e-14	1.44248e-13	[5, 6, 8]	Group08	4.04624	7	[CCL5, IFNG, IL10, IL1B, IL6, NFKB1, TNF]
GO:0042129	regulation of T cell proliferation	GO_BiologicalProcess-GOA_23.02.2017_10h01	3.90894e-09	2.50172e-07	2.06068e-14	1.44248e-13	[6, 7, 8]	Group08	4.34783	7	[CCL5, IFNG, IL10, IL1B, IL4, IL6, LEP]
GO:0045639	positive regulation of myeloid cell differentiation	GO_BiologicalProcess-GOA_23.02.2017_10h01	9.42191e-06	0.000188438	2.06068e-14	1.44248e-13	[4, 5, 6, 7, 8, 9, 10]	Group08	4.5977	4	[FOS, IFNG, LEP, TNF]
GO:0045670	regulation of osteoclast differentiation	GO_BiologicalProcess-GOA_23.02.2017_10h01	4.74417e-08	2.18232e-06	2.06068e-14	1.44248e-13	[6, 7, 8, 9, 10, 11]	Group08	7.69231	5	[BGLAP, FOS, IFNG, IL4, TNF]
GO:0045672	positive regulation of osteoclast differentiation	GO_BiologicalProcess-GOA_23.02.2017_10h01	6.62615e-06	0.000145775	2.06068e-14	1.44248e-13	[6, 7, 8, 9, 10, 11, 12]	Group08	12.5	3	[FOS, IFNG, TNF]
GO:1905953	negative regulation of lipid localization	GO_BiologicalProcess-GOA_23.02.2017_10h01	6.37762e-09	3.95412e-07	3.52878e-16	3.52878e-15	[2, 3, 4, 5]	Group09	11.3636	5	[APOA2, IL6, LEP, NFKB1, TNF]
GO:0010883	regulation of lipid storage	GO_BiologicalProcess-GOA_23.02.2017_10h01	6.59386e-07	2.30785e-05	3.52878e-16	3.52878e-15	[3, 4, 5]	Group09	8.88889	4	[IL6, LEP, NFKB1, TNF]
GO:0032615	interleukin-12 production	GO_BiologicalProcess-GOA_23.02.2017_10h01	1.18925e-06	3.21098e-05	3.52878e-16	3.52878e-15	[4]	Group09	7.69231	4	[IFNG, IL10, LEP, NFKB1]
GO:0032355	response to estradiol	GO_BiologicalProcess-GOA_23.02.2017_10h01	7.1786e-08	3.15858e-06	3.52878e-16	3.52878e-15	[4, 5]	Group09	4.1958	6	[CYP1A2, IL10, IL6, LEP, PTGS2, UGT1A1]
GO:0002637	regulation of immunoglobulin production	GO_BiologicalProcess-GOA_23.02.2017_10h01	2.21493e-08	1.26251e-06	3.52878e-16	3.52878e-15	[4, 5, 6]	Group09	8.92857	5	[IFNG, IL10, IL4, IL6, TNF]
GO:0032715	negative regulation of interleukin-6 production	GO_BiologicalProcess-GOA_23.02.2017_10h01	3.18133e-05	0.00038176	3.52878e-16	3.52878e-15	[4, 5, 6]	Group09	7.5	3	[IL10, IL6, TNF]
GO:0042832	defense response to protozoan	GO_BiologicalProcess-GOA_23.02.2017_10h01	1.76327e-08	1.0227e-06	3.52878e-16	3.52878e-15	[4, 5, 6]	Group09	21.0526	4	[IFNG, IL10, IL4, IL6]
GO:0043255	regulation of carbohydrate biosynthetic process	GO_BiologicalProcess-GOA_23.02.2017_10h01	1.28127e-05	0.000217816	3.52878e-16	3.52878e-15	[4, 5, 6]	Group09	4.25532	4	[IL6, INS, LEP, NFKB1]
GO:0010677	negative regulation of cellular carbohydrate metabolic process	GO_BiologicalProcess-GOA_23.02.2017_10h01	8.3174e-05	0.00041587	3.52878e-16	3.52878e-15	[4, 5, 6, 7]	Group09	5.45455	3	[IL6, INS, UGT1A1]
GO:0033619	membrane protein proteolysis	GO_BiologicalProcess-GOA_23.02.2017_10h01	2.42534e-08	1.33394e-06	3.52878e-16	3.52878e-15	[5, 6]	Group09	8.77193	5	[IFNG, IL10, IL1B, NFKB1, TNF]
GO:0042035	regulation of cytokine biosynthetic process	GO_BiologicalProcess-GOA_23.02.2017_10h01	3.19322e-12	2.68231e-10	3.52878e-16	3.52878e-15	[4, 5, 6, 7]	Group09	7.47664	8	[APOA2, IFNG, IL10, IL1B, IL4, IL6, NFKB1, TNF]
GO:0071392	cellular response to estradiol stimulus	GO_BiologicalProcess-GOA_23.02.2017_10h01	2.722e-05	0.00038108	3.52878e-16	3.52878e-15	[5, 6]	Group09	7.89474	3	[IL10, IL6, UGT1A1]
GO:0042036	negative regulation of cytokine biosynthetic process	GO_BiologicalProcess-GOA_23.02.2017_10h01	1.19006e-05	0.000214211	3.52878e-16	3.52878e-15	[4, 5, 6, 7, 8]	Group09	10.3448	3	[IL10, IL6, NFKB1]
GO:0071887	leukocyte apoptotic process	GO_BiologicalProcess-GOA_23.02.2017_10h01	8.00599e-07	2.48186e-05	3.52878e-16	3.52878e-15	[6]	Group09	4.38596	5	[CCL5, FAS, IFNG, IL10, IL6]
GO:1904019	epithelial cell apoptotic process	GO_BiologicalProcess-GOA_23.02.2017_10h01	3.76678e-07	1.43138e-05	3.52878e-16	3.52878e-15	[6]	Group09	5.10204	5	[FAS, IL10, IL4, IL6, TNF]
GO:0071222	cellular response to lipopolysaccharide	GO_BiologicalProcess-GOA_23.02.2017_10h01	6.44692e-09	3.93262e-07	3.52878e-16	3.52878e-15	[5, 6, 8]	Group09	4.04624	7	[CCL5, IFNG, IL10, IL1B, IL6, NFKB1, TNF]
GO:1904035	regulation of epithelial cell apoptotic process	GO_BiologicalProcess-GOA_23.02.2017_10h01	0.000193543	0.000193543	3.52878e-16	3.52878e-15	[6, 7]	Group09	4.10959	3	[IL10, IL4, IL6]
GO:0050710	negative regulation of cytokine secretion	GO_BiologicalProcess-GOA_23.02.2017_10h01	1.23638e-08	7.4183e-07	3.52878e-16	3.52878e-15	[4, 5, 6, 7, 8, 9, 10, 11]	Group09	10	5	[APOA1, APOA2, IL10, IL6, TNF]
GO:0071385	cellular response to glucocorticoid stimulus	GO_BiologicalProcess-GOA_23.02.2017_10h01	0.000124859	0.000249718	3.52878e-16	3.52878e-15	[7, 8]	Group09	4.7619	3	[IL6, NR3C1, UGT1A1]
GO:0042345	regulation of NF-kappaB import into nucleus	GO_BiologicalProcess-GOA_23.02.2017_10h01	8.58391e-07	2.57517e-05	1.2082e-17	1.32902e-16	[6, 7, 8, 9, 10, 11, 12, 13, 14]	Group10	8.33333	4	[IL10, IL1B, PTGS2, TNF]
GO:0043370	regulation of CD4-positive, alpha-beta T cell differentiation	GO_BiologicalProcess-GOA_23.02.2017_10h01	2.50971e-05	0.000376456	1.2082e-17	1.32902e-16	[8, 9, 10, 11, 12, 13]	Group10	8.10811	3	[IFNG, IL4, IL6]
GO:0072593	reactive oxygen species metabolic process	GO_BiologicalProcess-GOA_23.02.2017_10h01	1.00327e-13	8.92912e-12	1.2082e-17	1.32902e-16	[3]	Group10	4.10448	11	[CLU, CYP1A2, IFNG, IL10, IL1B, IL4, IL6, INS, LEP, PTGS2, TNF]
GO:0002367	cytokine production involved in immune response	GO_BiologicalProcess-GOA_23.02.2017_10h01	3.59812e-09	2.33878e-07	1.2082e-17	1.32902e-16	[3, 4]	Group10	6.89655	6	[APOA1, APOA2, IL10, IL4, IL6, TNF]
GO:0019915	lipid storage	GO_BiologicalProcess-GOA_23.02.2017_10h01	7.25999e-10	5.29979e-08	1.2082e-17	1.32902e-16	[3, 4]	Group10	8.95522	6	[APOA1, IL1B, IL6, LEP, NFKB1, TNF]
GO:1905952	regulation of lipid localization	GO_BiologicalProcess-GOA_23.02.2017_10h01	1.7069e-09	1.17776e-07	1.2082e-17	1.32902e-16	[3, 4]	Group10	4.8951	7	[APOA1, APOA2, IL1B, IL6, LEP, NFKB1, TNF]
GO:1905953	negative regulation of lipid localization	GO_BiologicalProcess-GOA_23.02.2017_10h01	6.37762e-09	3.95412e-07	1.2082e-17	1.32902e-16	[2, 3, 4, 5]	Group10	11.3636	5	[APOA2, IL6, LEP, NFKB1, TNF]
GO:0002698	negative regulation of immune effector process	GO_BiologicalProcess-GOA_23.02.2017_10h01	1.41026e-08	8.32052e-07	1.2082e-17	1.32902e-16	[3, 4, 5]	Group10	5.50459	6	[APOA1, APOA2, IL10, IL4, INS, TNF]
GO:0002700	regulation of production of molecular mediator of immune response	GO_BiologicalProcess-GOA_23.02.2017_10h01	5.27271e-10	4.05999e-08	1.2082e-17	1.32902e-16	[3, 4, 5]	Group10	5.78512	7	[APOA1, APOA2, IFNG, IL10, IL4, IL6, TNF]
GO:0010883	regulation of lipid storage	GO_BiologicalProcess-GOA_23.02.2017_10h01	6.59386e-07	2.30785e-05	1.2082e-17	1.32902e-16	[3, 4, 5]	Group10	8.88889	4	[IL6, LEP, NFKB1, TNF]
GO:0032612	interleukin-1 production	GO_BiologicalProcess-GOA_23.02.2017_10h01	3.95166e-06	9.87915e-05	1.2082e-17	1.32902e-16	[4]	Group10	5.71429	4	[APOA1, IFNG, IL10, IL1B]
GO:0032615	interleukin-12 production	GO_BiologicalProcess-GOA_23.02.2017_10h01	1.18925e-06	3.21098e-05	1.2082e-17	1.32902e-16	[4]	Group10	7.69231	4	[IFNG, IL10, LEP, NFKB1]
GO:0032635	interleukin-6 production	GO_BiologicalProcess-GOA_23.02.2017_10h01	2.51489e-08	1.35804e-06	1.2082e-17	1.32902e-16	[4]	Group10	5	6	[IFNG, IL10, IL1B, IL6, LEP, TNF]
GO:0032637	interleukin-8 production	GO_BiologicalProcess-GOA_23.02.2017_10h01	1.12051e-07	4.81818e-06	1.2082e-17	1.32902e-16	[4]	Group10	6.49351	5	[APOA2, IL10, IL1B, LEP, TNF]
GO:0050777	negative regulation of immune response	GO_BiologicalProcess-GOA_23.02.2017_10h01	4.06328e-08	1.95038e-06	1.2082e-17	1.32902e-16	[3, 4, 5]	Group10	4.61538	6	[APOA1, APOA2, IL10, IL4, INS, TNF]
GO:0001659	temperature homeostasis	GO_BiologicalProcess-GOA_23.02.2017_10h01	4.5008e-07	1.6653e-05	1.2082e-17	1.32902e-16	[4, 5]	Group10	9.7561	4	[CLU, IL1B, PTGS2, TNF]
GO:0010574	regulation of vascular endothelial growth factor production	GO_BiologicalProcess-GOA_23.02.2017_10h01	1.7696e-05	0.000283136	1.2082e-17	1.32902e-16	[4, 5]	Group10	9.09091	3	[IL1B, IL6, PTGS2]
GO:0032355	response to estradiol	GO_BiologicalProcess-GOA_23.02.2017_10h01	7.1786e-08	3.15858e-06	1.2082e-17	1.32902e-16	[4, 5]	Group10	4.1958	6	[CYP1A2, IL10, IL6, LEP, PTGS2, UGT1A1]
GO:0032642	regulation of chemokine production	GO_BiologicalProcess-GOA_23.02.2017_10h01	1.707e-09	1.16076e-07	1.2082e-17	1.32902e-16	[4, 5]	Group10	7.79221	6	[IFNG, IL10, IL1B, IL4, IL6, TNF]
GO:0032768	regulation of monooxygenase activity	GO_BiologicalProcess-GOA_23.02.2017_10h01	6.61671e-10	4.96253e-08	1.2082e-17	1.32902e-16	[4, 5]	Group10	9.09091	6	[IFNG, IL1B, INS, LEP, NFKB1, TNF]
GO:0045833	negative regulation of lipid metabolic process	GO_BiologicalProcess-GOA_23.02.2017_10h01	4.13194e-09	2.60312e-07	1.2082e-17	1.32902e-16	[3, 4, 5, 6]	Group10	6.74157	6	[APOA2, IL1B, INS, NFKB1, TNF, UGT1A1]
GO:0045834	positive regulation of lipid metabolic process	GO_BiologicalProcess-GOA_23.02.2017_10h01	1.7923e-09	1.20084e-07	1.2082e-17	1.32902e-16	[3, 4, 5, 6]	Group10	4.86111	7	[APOA1, APOA2, IFNG, IL1B, INS, PTGS2, TNF]
GO:0046850	regulation of bone remodeling	GO_BiologicalProcess-GOA_23.02.2017_10h01	4.85764e-05	0.00053434	1.2082e-17	1.32902e-16	[4, 5]	Group10	6.52174	3	[BGLAP, IL6, LEP]
GO:0048660	regulation of smooth muscle cell proliferation	GO_BiologicalProcess-GOA_23.02.2017_10h01	2.91657e-08	1.51662e-06	1.2082e-17	1.32902e-16	[4, 5]	Group10	4.87805	6	[CCL5, IFNG, IL10, IL6, PTGS2, TNF]
GO:0002526	acute inflammatory response	GO_BiologicalProcess-GOA_23.02.2017_10h01	1.29934e-12	1.11743e-10	1.2082e-17	1.32902e-16	[5]	Group10	5.73248	9	[APOA2, IL1B, IL1RN, IL4, IL6, INS, PTGS2, TNF, UGT1A1]
GO:0002637	regulation of immunoglobulin production	GO_BiologicalProcess-GOA_23.02.2017_10h01	2.21493e-08	1.26251e-06	1.2082e-17	1.32902e-16	[4, 5, 6]	Group10	8.92857	5	[IFNG, IL10, IL4, IL6, TNF]
GO:0032368	regulation of lipid transport	GO_BiologicalProcess-GOA_23.02.2017_10h01	7.33164e-07	2.41944e-05	1.2082e-17	1.32902e-16	[4, 5, 6]	Group10	4.46429	5	[APOA1, APOA2, IL1B, LEP, NFKB1]
GO:0032715	negative regulation of interleukin-6 production	GO_BiologicalProcess-GOA_23.02.2017_10h01	3.18133e-05	0.00038176	1.2082e-17	1.32902e-16	[4, 5, 6]	Group10	7.5	3	[IL10, IL6, TNF]
GO:0032770	positive regulation of monooxygenase activity	GO_BiologicalProcess-GOA_23.02.2017_10h01	1.23226e-07	5.17549e-06	1.2082e-17	1.32902e-16	[4, 5, 6]	Group10	13.3333	4	[IFNG, IL1B, INS, TNF]
GO:0034114	regulation of heterotypic cell-cell adhesion	GO_BiologicalProcess-GOA_23.02.2017_10h01	1.2244e-10	9.79516e-09	1.2082e-17	1.32902e-16	[4, 5, 6]	Group10	23.8095	5	[APOA1, IL10, IL1B, IL1RN, TNF]
GO:0042359	vitamin D metabolic process	GO_BiologicalProcess-GOA_23.02.2017_10h01	2.96069e-13	2.60541e-11	1.2082e-17	1.32902e-16	[4, 5, 6]	Group10	30	6	[CYP1A1, CYP3A4, IFNG, IL1B, NFKB1, TNF]
GO:0042832	defense response to protozoan	GO_BiologicalProcess-GOA_23.02.2017_10h01	1.76327e-08	1.0227e-06	1.2082e-17	1.32902e-16	[4, 5, 6]	Group10	21.0526	4	[IFNG, IL10, IL4, IL6]
GO:0043255	regulation of carbohydrate biosynthetic process	GO_BiologicalProcess-GOA_23.02.2017_10h01	1.28127e-05	0.000217816	1.2082e-17	1.32902e-16	[4, 5, 6]	Group10	4.25532	4	[IL6, INS, LEP, NFKB1]
GO:0045598	regulation of fat cell differentiation	GO_BiologicalProcess-GOA_23.02.2017_10h01	1.03275e-06	2.8917e-05	1.2082e-17	1.32902e-16	[4, 5, 6]	Group10	4.16667	5	[IL6, INS, LEP, PTGS2, TNF]
GO:0046165	alcohol biosynthetic process	GO_BiologicalProcess-GOA_23.02.2017_10h01	6.63206e-10	4.90773e-08	1.2082e-17	1.32902e-16	[5]	Group10	5.6	7	[APOA1, CYP3A4, IFNG, IL1B, LEP, NFKB1, TNF]
GO:0046890	regulation of lipid biosynthetic process	GO_BiologicalProcess-GOA_23.02.2017_10h01	3.75858e-11	3.04445e-09	1.2082e-17	1.32902e-16	[4, 5, 6]	Group10	5.51724	8	[APOA1, IFNG, IL1B, INS, LEP, NFKB1, PTGS2, TNF]
GO:0050994	regulation of lipid catabolic process	GO_BiologicalProcess-GOA_23.02.2017_10h01	3.43144e-08	1.71572e-06	1.2082e-17	1.32902e-16	[4, 5, 6]	Group10	8.19672	5	[APOA1, APOA2, IL1B, INS, TNF]
GO:1900407	regulation of cellular response to oxidative stress	GO_BiologicalProcess-GOA_23.02.2017_10h01	6.41404e-06	0.000147523	1.2082e-17	1.32902e-16	[4, 5, 6]	Group10	5.06329	4	[CLU, IL6, INS, TNF]
GO:0071674	mononuclear cell migration	GO_BiologicalProcess-GOA_23.02.2017_10h01	7.81144e-06	0.00016404	1.2082e-17	1.32902e-16	[3, 5, 6, 7]	Group10	4.81928	4	[CCL5, IL4, IL6, TNF]
GO:0002639	positive regulation of immunoglobulin production	GO_BiologicalProcess-GOA_23.02.2017_10h01	2.94578e-05	0.000382952	1.2082e-17	1.32902e-16	[4, 5, 6, 7]	Group10	7.69231	3	[IFNG, IL4, IL6]
GO:0002706	regulation of lymphocyte mediated immunity	GO_BiologicalProcess-GOA_23.02.2017_10h01	5.588e-10	4.24688e-08	1.2082e-17	1.32902e-16	[5, 6]	Group10	5.7377	7	[IFNG, IL10, IL1B, IL4, IL6, LEP, TNF]
GO:0002822	regulation of adaptive immune response based on somatic recombination of immune receptors built from immunoglobulin superfamily domains	GO_BiologicalProcess-GOA_23.02.2017_10h01	3.36984e-08	1.71862e-06	1.2082e-17	1.32902e-16	[5, 6]	Group10	4.7619	6	[IFNG, IL10, IL1B, IL4, IL6, TNF]
GO:0010677	negative regulation of cellular carbohydrate metabolic process	GO_BiologicalProcess-GOA_23.02.2017_10h01	8.3174e-05	0.00041587	1.2082e-17	1.32902e-16	[4, 5, 6, 7]	Group10	5.45455	3	[IL6, INS, UGT1A1]
GO:0019218	regulation of steroid metabolic process	GO_BiologicalProcess-GOA_23.02.2017_10h01	5.83742e-13	5.07856e-11	1.2082e-17	1.32902e-16	[5, 6]	Group10	9.1954	8	[APOA1, APOA2, IFNG, IL1B, LEP, NFKB1, TNF, UGT1A1]
GO:0033619	membrane protein proteolysis	GO_BiologicalProcess-GOA_23.02.2017_10h01	2.42534e-08	1.33394e-06	1.2082e-17	1.32902e-16	[5, 6]	Group10	8.77193	5	[IFNG, IL10, IL1B, NFKB1, TNF]
GO:0034116	positive regulation of heterotypic cell-cell adhesion	GO_BiologicalProcess-GOA_23.02.2017_10h01	5.47501e-07	1.97101e-05	1.2082e-17	1.32902e-16	[4, 5, 6, 7]	Group10	27.2727	3	[IL10, IL1B, TNF]
GO:0042035	regulation of cytokine biosynthetic process	GO_BiologicalProcess-GOA_23.02.2017_10h01	3.19322e-12	2.68231e-10	1.2082e-17	1.32902e-16	[4, 5, 6, 7]	Group10	7.47664	8	[APOA2, IFNG, IL10, IL1B, IL4, IL6, NFKB1, TNF]
GO:0045428	regulation of nitric oxide biosynthetic process	GO_BiologicalProcess-GOA_23.02.2017_10h01	1.41544e-16	1.28805e-14	1.2082e-17	1.32902e-16	[4, 5, 6, 7]	Group10	15.2542	9	[CLU, IFNG, IL10, IL1B, IL4, IL6, INS, PTGS2, TNF]
GO:0045940	positive regulation of steroid metabolic process	GO_BiologicalProcess-GOA_23.02.2017_10h01	1.01161e-09	7.28358e-08	1.2082e-17	1.32902e-16	[4, 5, 6, 7]	Group10	16.129	5	[APOA1, APOA2, IFNG, IL1B, TNF]
GO:0050996	positive regulation of lipid catabolic process	GO_BiologicalProcess-GOA_23.02.2017_10h01	1.06806e-05	0.000202931	1.2082e-17	1.32902e-16	[4, 5, 6, 7]	Group10	10.7143	3	[APOA1, APOA2, IL1B]
GO:0050999	regulation of nitric-oxide synthase activity	GO_BiologicalProcess-GOA_23.02.2017_10h01	7.44224e-05	0.000446534	1.2082e-17	1.32902e-16	[5, 6]	Group10	5.66038	3	[IL1B, INS, LEP]
GO:0071392	cellular response to estradiol stimulus	GO_BiologicalProcess-GOA_23.02.2017_10h01	2.722e-05	0.00038108	1.2082e-17	1.32902e-16	[5, 6]	Group10	7.89474	3	[IL10, IL6, UGT1A1]
GO:1900182	positive regulation of protein localization to nucleus	GO_BiologicalProcess-GOA_23.02.2017_10h01	1.20038e-09	8.52272e-08	1.2082e-17	1.32902e-16	[3, 4, 5, 6, 7, 8]	Group10	5.14706	7	[IFNG, IL1B, IL6, INS, LEP, PTGS2, TNF]
GO:1903531	negative regulation of secretion by cell	GO_BiologicalProcess-GOA_23.02.2017_10h01	2.88661e-10	2.25156e-08	1.2082e-17	1.32902e-16	[3, 4, 5, 6, 7, 8]	Group10	4.27807	8	[APOA1, APOA2, IL10, IL1B, IL6, INS, LEP, TNF]
GO:0002673	regulation of acute inflammatory response	GO_BiologicalProcess-GOA_23.02.2017_10h01	2.50799e-09	1.65527e-07	1.2082e-17	1.32902e-16	[5, 6, 7]	Group10	7.31707	6	[IL1B, IL4, IL6, INS, PTGS2, TNF]
GO:0002676	regulation of chronic inflammatory response	GO_BiologicalProcess-GOA_23.02.2017_10h01	1.51402e-09	1.05981e-07	1.2082e-17	1.32902e-16	[5, 6, 7]	Group10	36.3636	4	[CCL5, IL10, IL4, TNF]
GO:0002708	positive regulation of lymphocyte mediated immunity	GO_BiologicalProcess-GOA_23.02.2017_10h01	1.12051e-07	4.81818e-06	1.2082e-17	1.32902e-16	[5, 6, 7]	Group10	6.49351	5	[IFNG, IL1B, IL4, IL6, TNF]
GO:0006953	acute-phase response	GO_BiologicalProcess-GOA_23.02.2017_10h01	2.67598e-12	2.27459e-10	1.2082e-17	1.32902e-16	[6]	Group10	12.069	7	[IL1B, IL1RN, IL6, INS, PTGS2, TNF, UGT1A1]
GO:0032760	positive regulation of tumor necrosis factor production	GO_BiologicalProcess-GOA_23.02.2017_10h01	0.000113394	0.000340182	1.2082e-17	1.32902e-16	[5, 6, 7]	Group10	4.91803	3	[CLU, IFNG, LEP]
GO:0042036	negative regulation of cytokine biosynthetic process	GO_BiologicalProcess-GOA_23.02.2017_10h01	1.19006e-05	0.000214211	1.2082e-17	1.32902e-16	[4, 5, 6, 7, 8]	Group10	10.3448	3	[IL10, IL6, NFKB1]
GO:0042108	positive regulation of cytokine biosynthetic process	GO_BiologicalProcess-GOA_23.02.2017_10h01	5.53527e-08	2.49087e-06	1.2082e-17	1.32902e-16	[4, 5, 6, 7, 8]	Group10	7.46269	5	[APOA2, IFNG, IL1B, IL4, TNF]
GO:0044130	negative regulation of growth of symbiont in host	GO_BiologicalProcess-GOA_23.02.2017_10h01	3.18878e-06	8.29083e-05	1.2082e-17	1.32902e-16	[4, 5, 6, 7, 8]	Group10	15.7895	3	[IFNG, IL10, TNF]
GO:0045348	positive regulation of MHC class II biosynthetic process	GO_BiologicalProcess-GOA_23.02.2017_10h01	2.79306e-07	1.0893e-05	1.2082e-17	1.32902e-16	[5, 6, 7]	Group10	33.3333	3	[IFNG, IL10, IL4]
GO:0050810	regulation of steroid biosynthetic process	GO_BiologicalProcess-GOA_23.02.2017_10h01	2.65134e-08	1.40521e-06	1.2082e-17	1.32902e-16	[5, 6, 7]	Group10	8.62069	5	[IFNG, IL1B, LEP, NFKB1, TNF]
GO:0071887	leukocyte apoptotic process	GO_BiologicalProcess-GOA_23.02.2017_10h01	8.00599e-07	2.48186e-05	1.2082e-17	1.32902e-16	[6]	Group10	4.38596	5	[CCL5, FAS, IFNG, IL10, IL6]
GO:0090335	regulation of brown fat cell differentiation	GO_BiologicalProcess-GOA_23.02.2017_10h01	9.47037e-07	2.74641e-05	1.2082e-17	1.32902e-16	[5, 6, 7]	Group10	23.0769	3	[INS, LEP, PTGS2]
GO:0097192	extrinsic apoptotic signaling pathway in absence of ligand	GO_BiologicalProcess-GOA_23.02.2017_10h01	4.67605e-06	0.000112225	1.2082e-17	1.32902e-16	[4, 5, 6, 7, 8]	Group10	5.47945	4	[FAS, IL1B, IL4, TNF]
GO:1904019	epithelial cell apoptotic process	GO_BiologicalProcess-GOA_23.02.2017_10h01	3.76678e-07	1.43138e-05	1.2082e-17	1.32902e-16	[6]	Group10	5.10204	5	[FAS, IL10, IL4, IL6, TNF]
GO:0031663	lipopolysaccharide-mediated signaling pathway	GO_BiologicalProcess-GOA_23.02.2017_10h01	0.000102639	0.000410555	1.2082e-17	1.32902e-16	[4, 5, 6, 7, 9]	Group10	5.08475	3	[CCL5, IL1B, TNF]
GO:0071222	cellular response to lipopolysaccharide	GO_BiologicalProcess-GOA_23.02.2017_10h01	6.44692e-09	3.93262e-07	1.2082e-17	1.32902e-16	[5, 6, 8]	Group10	4.04624	7	[CCL5, IFNG, IL10, IL1B, IL6, NFKB1, TNF]
GO:0002675	positive regulation of acute inflammatory response	GO_BiologicalProcess-GOA_23.02.2017_10h01	1.41332e-07	5.7946e-06	1.2082e-17	1.32902e-16	[5, 6, 7, 8]	Group10	12.9032	4	[IL1B, IL6, PTGS2, TNF]
GO:0002792	negative regulation of peptide secretion	GO_BiologicalProcess-GOA_23.02.2017_10h01	7.59345e-12	6.30256e-10	1.2082e-17	1.32902e-16	[4, 5, 6, 7, 8, 9]	Group10	6.72269	8	[APOA1, APOA2, IL10, IL1B, IL6, INS, LEP, TNF]
GO:0030301	cholesterol transport	GO_BiologicalProcess-GOA_23.02.2017_10h01	1.63619e-07	6.54475e-06	1.2082e-17	1.32902e-16	[6, 7]	Group10	6.0241	5	[APOA1, APOA2, CLU, LEP, NFKB1]
GO:0046888	negative regulation of hormone secretion	GO_BiologicalProcess-GOA_23.02.2017_10h01	0.000193543	0.000193543	1.2082e-17	1.32902e-16	[3, 4, 5, 6, 7, 8, 9, 10]	Group10	4.10959	3	[IL1B, IL6, LEP]
GO:0050663	cytokine secretion	GO_BiologicalProcess-GOA_23.02.2017_10h01	9.67149e-12	7.93062e-10	1.2082e-17	1.32902e-16	[4, 5, 6, 7, 8, 9]	Group10	4.59184	9	[APOA1, APOA2, IFNG, IL10, IL1B, IL6, INS, LEP, TNF]
GO:0051043	regulation of membrane protein ectodomain proteolysis	GO_BiologicalProcess-GOA_23.02.2017_10h01	4.01128e-08	1.96553e-06	1.2082e-17	1.32902e-16	[5, 6, 7, 8]	Group10	17.3913	4	[IFNG, IL10, IL1B, TNF]
GO:1904035	regulation of epithelial cell apoptotic process	GO_BiologicalProcess-GOA_23.02.2017_10h01	0.000193543	0.000193543	1.2082e-17	1.32902e-16	[6, 7]	Group10	4.10959	3	[IL10, IL4, IL6]
GO:0034115	negative regulation of heterotypic cell-cell adhesion	GO_BiologicalProcess-GOA_23.02.2017_10h01	5.47501e-07	1.97101e-05	1.2082e-17	1.32902e-16	[5, 6, 7, 8, 9]	Group10	27.2727	3	[APOA1, IL10, IL1RN]
GO:0042129	regulation of T cell proliferation	GO_BiologicalProcess-GOA_23.02.2017_10h01	3.90894e-09	2.50172e-07	1.2082e-17	1.32902e-16	[6, 7, 8]	Group10	4.34783	7	[CCL5, IFNG, IL10, IL1B, IL4, IL6, LEP]
GO:0045639	positive regulation of myeloid cell differentiation	GO_BiologicalProcess-GOA_23.02.2017_10h01	9.42191e-06	0.000188438	1.2082e-17	1.32902e-16	[4, 5, 6, 7, 8, 9, 10]	Group10	4.5977	4	[FOS, IFNG, LEP, TNF]
GO:0046626	regulation of insulin receptor signaling pathway	GO_BiologicalProcess-GOA_23.02.2017_10h01	5.87744e-05	0.000587744	1.2082e-17	1.32902e-16	[4, 5, 6, 7, 8, 9, 10]	Group10	6.12245	3	[IL1B, INS, LEP]
GO:0060558	regulation of calcidiol 1-monooxygenase activity	GO_BiologicalProcess-GOA_23.02.2017_10h01	1.6126e-10	1.27395e-08	1.2082e-17	1.32902e-16	[5, 6, 7, 8, 9]	Group10	57.1429	4	[IFNG, IL1B, NFKB1, TNF]
GO:0072577	endothelial cell apoptotic process	GO_BiologicalProcess-GOA_23.02.2017_10h01	6.24613e-05	0.000562151	1.2082e-17	1.32902e-16	[7]	Group10	6	3	[IL10, IL4, TNF]
GO:0002889	regulation of immunoglobulin mediated immune response	GO_BiologicalProcess-GOA_23.02.2017_10h01	7.2142e-07	2.45283e-05	1.2082e-17	1.32902e-16	[7, 8]	Group10	8.69565	4	[IFNG, IL10, IL4, TNF]
GO:0032309	icosanoid secretion	GO_BiologicalProcess-GOA_23.02.2017_10h01	7.02826e-05	0.000491978	1.2082e-17	1.32902e-16	[6, 7, 8, 9]	Group10	5.76923	3	[ACE, IL1B, LEP]
GO:0043691	reverse cholesterol transport	GO_BiologicalProcess-GOA_23.02.2017_10h01	3.18878e-06	8.29083e-05	1.2082e-17	1.32902e-16	[7, 8]	Group10	15.7895	3	[APOA1, APOA2, CLU]
GO:0050710	negative regulation of cytokine secretion	GO_BiologicalProcess-GOA_23.02.2017_10h01	1.23638e-08	7.4183e-07	1.2082e-17	1.32902e-16	[4, 5, 6, 7, 8, 9, 10, 11]	Group10	10	5	[APOA1, APOA2, IL10, IL6, TNF]
GO:0050715	positive regulation of cytokine secretion	GO_BiologicalProcess-GOA_23.02.2017_10h01	7.33164e-07	2.41944e-05	1.2082e-17	1.32902e-16	[4, 5, 6, 7, 8, 9, 10, 11]	Group10	4.46429	5	[IFNG, IL10, IL1B, INS, TNF]
GO:0002294	CD4-positive, alpha-beta T cell differentiation involved in immune response	GO_BiologicalProcess-GOA_23.02.2017_10h01	6.62964e-05	0.000530371	1.2082e-17	1.32902e-16	[3, 4, 5, 6, 7, 8, 9, 10, 11, 12, 13]	Group10	5.88235	3	[IFNG, IL4, IL6]
GO:0070230	positive regulation of lymphocyte apoptotic process	GO_BiologicalProcess-GOA_23.02.2017_10h01	6.62615e-06	0.000145775	1.2082e-17	1.32902e-16	[7, 8, 9]	Group10	12.5	3	[CCL5, FAS, IL10]
GO:0045670	regulation of osteoclast differentiation	GO_BiologicalProcess-GOA_23.02.2017_10h01	4.74417e-08	2.18232e-06	1.2082e-17	1.32902e-16	[6, 7, 8, 9, 10, 11]	Group10	7.69231	5	[BGLAP, FOS, IFNG, IL4, TNF]
GO:0045672	positive regulation of osteoclast differentiation	GO_BiologicalProcess-GOA_23.02.2017_10h01	6.62615e-06	0.000145775	1.2082e-17	1.32902e-16	[6, 7, 8, 9, 10, 11, 12]	Group10	12.5	3	[FOS, IFNG, TNF]
GO:0042531	positive regulation of tyrosine phosphorylation of STAT protein	GO_BiologicalProcess-GOA_23.02.2017_10h01	4.38386e-08	2.06042e-06	1.2082e-17	1.32902e-16	[7, 8, 9, 10, 11, 12]	Group10	7.8125	5	[CCL5, IFNG, IL4, IL6, LEP]
