# Supplementary material for: Pharmacological Network Reveals the Active Mechanism of Qi-Replenishing, Spleen-Strengthening, Phlegm-Dispelling, and Blood-Nourishing Fufang on Coronary Heart Disease
Source: Evid Based Complement Alternat Med. 2020 Dec 29;2020:1062325. doi: 10.1155/2020/1062325 (PMC7785359; doi:10.1155/2020/1062325)
Supplement: Supplementary Materials — Supplemental Table 1: the 222 components with target records for the four main Chinese medicinal herbs. Supplemental Table 2: the component-target pairs for the important components as screened by ADME. Supplemental Table 3: enriched GO functional terms for the 27 target genes. Supplemental Table 4: enriched KEGG pathways for the 27 target genes. [file 1062325.f1.zip › Supplementary files/Supplemental Table 4.xls]

## Sheet: Sheet1
	ID	Description	GeneRatio	BgRatio	pvalue	p.adjust	qvalue	geneID	Count	gene
hsa05142	hsa05142	Chagas disease (American trypanosomiasis)	2020-10-27	102/7926	5.59501e-13	8.61632e-11	3.88706e-11	4790/7124/6352/3553/3458/1636/3586/3569/355/2353	10	NFKB1/TNF/CCL5/IL1B/IFNG/ACE/IL10/IL6/FAS/FOS
hsa05143	hsa05143	African trypanosomiasis	2020-07-27	37/7926	2.19999e-11	1.69399e-09	7.64207e-10	7124/3553/3458/3586/3569/335/355	7	TNF/IL1B/IFNG/IL10/IL6/APOA1/FAS
hsa05140	hsa05140	Leishmaniasis	2020-08-27	76/7926	9.40145e-11	4.82608e-09	2.17718e-09	4790/7124/5743/3553/3458/3586/3565/2353	8	NFKB1/TNF/PTGS2/IL1B/IFNG/IL10/IL4/FOS
hsa04657	hsa04657	IL-17 signaling pathway	2020-08-27	94/7926	5.33948e-10	2.0557e-08	9.27384e-09	4790/7124/5743/3553/3458/3569/3565/2353	8	NFKB1/TNF/PTGS2/IL1B/IFNG/IL6/IL4/FOS
hsa05321	hsa05321	Inflammatory bowel disease (IBD)	2020-07-27	65/7926	1.39801e-09	4.30587e-08	1.9425e-08	4790/7124/3553/3458/3586/3569/3565	7	NFKB1/TNF/IL1B/IFNG/IL10/IL6/IL4
hsa04668	hsa04668	TNF signaling pathway	2020-08-27	112/7926	2.19411e-09	5.63155e-08	2.54055e-08	4790/7124/5743/6352/3553/3569/355/2353	8	NFKB1/TNF/PTGS2/CCL5/IL1B/IL6/FAS/FOS
hsa04060	hsa04060	Cytokine-cytokine receptor interaction	2020-10-27	294/7926	2.04118e-08	4.49059e-07	2.02583e-07	7124/6352/3553/3557/3952/3458/3586/3569/3565/355	10	TNF/CCL5/IL1B/IL1RN/LEP/IFNG/IL10/IL6/IL4/FAS
hsa05330	hsa05330	Allograft rejection	2020-05-27	38/7926	1.44184e-07	2.74652e-06	1.23903e-06	7124/3458/3586/3565/355	5	TNF/IFNG/IL10/IL4/FAS
hsa05133	hsa05133	Pertussis	2020-06-27	76/7926	1.60511e-07	2.74652e-06	1.23903e-06	4790/7124/3553/3586/3569/2353	6	NFKB1/TNF/IL1B/IL10/IL6/FOS
hsa05332	hsa05332	Graft-versus-host disease	2020-05-27	41/7926	2.13772e-07	3.29209e-06	1.48516e-06	7124/3553/3458/3569/355	5	TNF/IL1B/IFNG/IL6/FAS
hsa04940	hsa04940	Type I diabetes mellitus	2020-05-27	43/7926	2.73318e-07	3.82645e-06	1.72622e-06	7124/3553/3458/3630/355	5	TNF/IL1B/IFNG/INS/FAS
hsa04932	hsa04932	Non-alcoholic fatty liver disease (NAFLD)	2020-07-27	149/7926	4.66889e-07	5.92139e-06	2.67131e-06	4790/7124/3553/3952/3630/3569/355	7	NFKB1/TNF/IL1B/LEP/INS/IL6/FAS
hsa05144	hsa05144	Malaria	2020-05-27	49/7926	5.33949e-07	5.92139e-06	2.67131e-06	7124/3553/3458/3586/3569	5	TNF/IL1B/IFNG/IL10/IL6
hsa05323	hsa05323	Rheumatoid arthritis	2020-06-27	93/7926	5.38308e-07	5.92139e-06	2.67131e-06	7124/6352/3553/3458/3569/2353	6	TNF/CCL5/IL1B/IFNG/IL6/FOS
hsa05146	hsa05146	Amoebiasis	2020-06-27	102/7926	9.31569e-07	8.94021e-06	4.03318e-06	4790/7124/3553/3458/3586/3569	6	NFKB1/TNF/IL1B/IFNG/IL10/IL6
hsa04620	hsa04620	Toll-like receptor signaling pathway	2020-06-27	104/7926	1.04496e-06	8.94021e-06	4.03318e-06	4790/7124/6352/3553/3569/2353	6	NFKB1/TNF/CCL5/IL1B/IL6/FOS
hsa04625	hsa04625	C-type lectin receptor signaling pathway	2020-06-27	104/7926	1.04496e-06	8.94021e-06	4.03318e-06	4790/7124/5743/3553/3586/3569	6	NFKB1/TNF/PTGS2/IL1B/IL10/IL6
hsa04660	hsa04660	T cell receptor signaling pathway	2020-06-27	104/7926	1.04496e-06	8.94021e-06	4.03318e-06	4790/7124/3458/3586/3565/2353	6	NFKB1/TNF/IFNG/IL10/IL4/FOS
hsa05164	hsa05164	Influenza A	2020-07-27	170/7926	1.14134e-06	9.25087e-06	4.17332e-06	4790/7124/6352/3553/3458/3569/355	7	NFKB1/TNF/CCL5/IL1B/IFNG/IL6/FAS
hsa04659	hsa04659	Th17 cell differentiation	2020-06-27	107/7926	1.23606e-06	9.51765e-06	4.29368e-06	4790/3553/3458/3569/3565/2353	6	NFKB1/IL1B/IFNG/IL6/IL4/FOS
hsa05135	hsa05135	Yersinia infection	2020-06-27	120/7926	2.42499e-06	1.77833e-05	8.02253e-06	4790/7124/3553/3586/3569/2353	6	NFKB1/TNF/IL1B/IL10/IL6/FOS
hsa01523	hsa01523	Antifolate resistance	2020-04-27	31/7926	3.15616e-06	2.20931e-05	9.96682e-06	4790/7124/3553/3569	4	NFKB1/TNF/IL1B/IL6
hsa05132	hsa05132	Salmonella infection	2020-05-27	80/7926	6.26381e-06	4.19403e-05	1.89204e-05	4790/3553/3458/3569/2353	5	NFKB1/IL1B/IFNG/IL6/FOS
hsa05204	hsa05204	Chemical carcinogenesis	2020-05-27	82/7926	7.07643e-06	4.54071e-05	2.04844e-05	1576/5743/1544/54658/1543	5	CYP3A4/PTGS2/CYP1A2/UGT1A1/CYP1A1
hsa05163	hsa05163	Human cytomegalovirus infection	2020-07-27	225/7926	7.40214e-06	4.55972e-05	2.05702e-05	4790/7124/5743/6352/3553/3569/355	7	NFKB1/TNF/PTGS2/CCL5/IL1B/IL6/FAS
hsa05152	hsa05152	Tuberculosis	2020-06-27	179/7926	2.43385e-05	0.000144159	6.50339e-05	4790/7124/3553/3458/3586/3569	6	NFKB1/TNF/IL1B/IFNG/IL10/IL6
hsa05134	hsa05134	Legionellosis	2020-04-27	56/7926	3.47606e-05	0.000198264	8.94424e-05	4790/7124/3553/3569	4	NFKB1/TNF/IL1B/IL6
hsa00140	hsa00140	Steroid hormone biosynthesis	2020-04-27	60/7926	4.57227e-05	0.00024863	0.000112164	1576/1544/54658/1543	4	CYP3A4/CYP1A2/UGT1A1/CYP1A1
hsa05130	hsa05130	Pathogenic Escherichia coli infection	2020-06-27	201/7926	4.682e-05	0.00024863	0.000112164	4790/7124/3553/3569/355/2353	6	NFKB1/TNF/IL1B/IL6/FAS/FOS
hsa04623	hsa04623	Cytosolic DNA-sensing pathway	2020-04-27	63/7926	5.54636e-05	0.000284713	0.000128442	4790/6352/3553/3569	4	NFKB1/CCL5/IL1B/IL6
hsa04380	hsa04380	Osteoclast differentiation	2020-05-27	128/7926	6.16517e-05	0.00030627	0.000138167	4790/7124/3553/3458/2353	5	NFKB1/TNF/IL1B/IFNG/FOS
hsa00830	hsa00830	Retinol metabolism	2020-04-27	67/7926	7.07076e-05	0.00034028	0.00015351	1576/1544/54658/1543	4	CYP3A4/CYP1A2/UGT1A1/CYP1A1
hsa05162	hsa05162	Measles	2020-05-27	138/7926	8.82455e-05	0.000411812	0.00018578	4790/3553/3569/355/2353	5	NFKB1/IL1B/IL6/FAS/FOS
hsa05418	hsa05418	Fluid shear stress and atherosclerosis	2020-05-27	139/7926	9.13253e-05	0.00041365	0.000186609	4790/7124/3553/3458/2353	5	NFKB1/TNF/IL1B/IFNG/FOS
hsa00980	hsa00980	Metabolism of xenobiotics by cytochrome P450	2020-04-27	76/7926	0.000115902	0.000509969	0.000230061	1576/1544/54658/1543	4	CYP3A4/CYP1A2/UGT1A1/CYP1A1
hsa05310	hsa05310	Asthma	2020-03-27	31/7926	0.00014872	0.000636193	0.000287004	7124/3586/3565	3	TNF/IL10/IL4
hsa04630	hsa04630	JAK-STAT signaling pathway	2020-05-27	162/7926	0.000188081	0.000762221	0.000343859	3952/3458/3586/3569/3565	5	LEP/IFNG/IL10/IL6/IL4
hsa05161	hsa05161	Hepatitis B	2020-05-27	162/7926	0.000188081	0.000762221	0.000343859	4790/7124/3569/355/2353	5	NFKB1/TNF/IL6/FAS/FOS
hsa05020	hsa05020	Prion diseases	2020-03-27	35/7926	0.000214588	0.000847348	0.000382262	6352/3553/3569	3	CCL5/IL1B/IL6
hsa04658	hsa04658	Th1 and Th2 cell differentiation	2020-04-27	92/7926	0.000243197	0.00093631	0.000422395	4790/3458/3565/2353	4	NFKB1/IFNG/IL4/FOS
hsa04640	hsa04640	Hematopoietic cell lineage	2020-04-27	98/7926	0.000310047	0.00115626	0.000521622	7124/3553/3569/3565	4	TNF/IL1B/IL6/IL4
hsa04621	hsa04621	NOD-like receptor signaling pathway	2020-05-27	181/7926	0.000315344	0.00115626	0.000521622	4790/7124/6352/3553/3569	5	NFKB1/TNF/CCL5/IL1B/IL6
hsa04061	hsa04061	Viral protein interaction with cytokine and cytokine receptor	2020-04-27	100/7926	0.000335002	0.00117251	0.000528951	7124/6352/3586/3569	4	TNF/CCL5/IL10/IL6
hsa04933	hsa04933	AGE-RAGE signaling pathway in diabetic complications	2020-04-27	100/7926	0.000335002	0.00117251	0.000528951	4790/7124/3553/3569	4	NFKB1/TNF/IL1B/IL6
hsa05167	hsa05167	Kaposi sarcoma-associated herpesvirus infection	2020-05-27	186/7926	0.000357723	0.0012098	0.000545775	4790/5743/3569/355/2353	5	NFKB1/PTGS2/IL6/FAS/FOS
hsa04064	hsa04064	NF-kappa B signaling pathway	2020-04-27	102/7926	0.000361369	0.0012098	0.000545775	4790/7124/5743/3553	4	NFKB1/TNF/PTGS2/IL1B
hsa04010	hsa04010	MAPK signaling pathway	2020-06-27	295/7926	0.000385875	0.00126436	0.000570387	4790/7124/3553/3630/355/2353	6	NFKB1/TNF/IL1B/INS/FAS/FOS
hsa04931	hsa04931	Insulin resistance	2020-04-27	108/7926	0.000449402	0.00144183	0.00065045	4790/7124/3630/3569	4	NFKB1/TNF/INS/IL6
hsa04066	hsa04066	HIF-1 signaling pathway	2020-04-27	109/7926	0.000465438	0.00146281	0.000659912	4790/3458/3630/3569	4	NFKB1/IFNG/INS/IL6
hsa05145	hsa05145	Toxoplasmosis	2020-04-27	112/7926	0.000516002	0.00158929	0.000716971	4790/7124/3458/3586	4	NFKB1/TNF/IFNG/IL10
hsa04672	hsa04672	Intestinal immune network for IgA production	2020-03-27	49/7926	0.000585166	0.00173299	0.000781801	3586/3569/3565	3	IL10/IL6/IL4
hsa04913	hsa04913	Ovarian steroidogenesis	2020-03-27	49/7926	0.000585166	0.00173299	0.000781801	5743/3630/1543	3	PTGS2/INS/CYP1A1
hsa05320	hsa05320	Autoimmune thyroid disease	2020-03-27	53/7926	0.000737314	0.00214238	0.000966489	3586/3565/355	3	IL10/IL4/FAS
hsa05168	hsa05168	Herpes simplex virus 1 infection	2020-07-27	491/7926	0.0010038	0.00286268	0.00129144	4790/7124/6352/3553/3458/3569/355	7	NFKB1/TNF/CCL5/IL1B/IFNG/IL6/FAS
hsa04210	hsa04210	Apoptosis	2020-04-27	136/7926	0.00107121	0.00299938	0.0013531	4790/7124/355/2353	4	NFKB1/TNF/FAS/FOS
hsa04920	hsa04920	Adipocytokine signaling pathway	2020-03-27	69/7926	0.00159031	0.00437335	0.00197294	4790/7124/3952	3	NFKB1/TNF/LEP
hsa04917	hsa04917	Prolactin signaling pathway	2020-03-27	70/7926	0.00165776	0.00447885	0.00202053	4790/3630/2353	3	NFKB1/INS/FOS
hsa05160	hsa05160	Hepatitis C	2020-04-27	155/7926	0.00173875	0.00461482	0.00208187	4790/7124/3458/355	4	NFKB1/TNF/IFNG/FAS
hsa00982	hsa00982	Drug metabolism - cytochrome P450	2020-03-27	72/7926	0.00179798	0.00461482	0.00208187	1576/1544/54658	3	CYP3A4/CYP1A2/UGT1A1
hsa04976	hsa04976	Bile secretion	2020-03-27	72/7926	0.00179798	0.00461482	0.00208187	1576/5243/10599	3	CYP3A4/ABCB1/SLCO1B1
hsa04217	hsa04217	Necroptosis	2020-04-27	162/7926	0.00204473	0.00516211	0.00232877	7124/3553/3458/355	4	TNF/IL1B/IFNG/FAS
hsa05235	hsa05235	PD-L1 expression and PD-1 checkpoint pathway in cancer	2020-03-27	89/7926	0.00329434	0.00818271	0.00369145	4790/3458/2353	3	NFKB1/IFNG/FOS
hsa05410	hsa05410	Hypertrophic cardiomyopathy (HCM)	2020-03-27	90/7926	0.00340023	0.00831168	0.00374963	7124/1636/3569	3	TNF/ACE/IL6
hsa00591	hsa00591	Linoleic acid metabolism	2020-02-27	29/7926	0.00428722	0.0103161	0.00465389	1576/1544	2	CYP3A4/CYP1A2
hsa05169	hsa05169	Epstein-Barr virus infection	2020-04-27	201/7926	0.00445792	0.0105618	0.00476474	4790/7124/3569/355	4	NFKB1/TNF/IL6/FAS
hsa05170	hsa05170	Human immunodeficiency virus 1 infection	2020-04-27	212/7926	0.00538596	0.0125672	0.00566943	4790/7124/355/2353	4	NFKB1/TNF/FAS/FOS
hsa05166	hsa05166	Human T-cell leukemia virus 1 infection	2020-04-27	219/7926	0.00603984	0.0138826	0.00626283	4790/7124/3569/2353	4	NFKB1/TNF/IL6/FOS
hsa00380	hsa00380	Tryptophan metabolism	2020-02-27	42/7926	0.00884775	0.0200375	0.00903949	1544/1543	2	CYP1A2/CYP1A1
hsa04068	hsa04068	FoxO signaling pathway	2020-03-27	131/7926	0.00965942	0.0212507	0.00958679	3630/3586/3569	3	INS/IL10/IL6
hsa04650	hsa04650	Natural killer cell mediated cytotoxicity	2020-03-27	131/7926	0.00965942	0.0212507	0.00958679	7124/3458/355	3	TNF/IFNG/FAS
hsa05322	hsa05322	Systemic lupus erythematosus	2020-03-27	133/7926	0.0100666	0.0218346	0.0098502	7124/3458/3586	3	TNF/IFNG/IL10
hsa04930	hsa04930	Type II diabetes mellitus	2020-02-27	46/7926	0.0105472	0.0225594	0.0101772	7124/3630	2	TNF/INS
hsa04979	hsa04979	Cholesterol metabolism	2020-02-27	50/7926	0.0123796	0.0261158	0.0117816	336/335	2	APOA2/APOA1
hsa04923	hsa04923	Regulation of lipolysis in adipocytes	2020-02-27	55/7926	0.0148513	0.0309067	0.0139429	5743/3630	2	PTGS2/INS
hsa05010	hsa05010	Alzheimer disease	2020-03-27	171/7926	0.0197389	0.0405306	0.0182845	7124/3553/355	3	TNF/IL1B/FAS
hsa04664	hsa04664	Fc epsilon RI signaling pathway	2020-02-27	68/7926	0.0221731	0.0449297	0.020269	7124/3565	2	TNF/IL4
hsa04622	hsa04622	RIG-I-like receptor signaling pathway	2020-02-27	70/7926	0.023409	0.0462177	0.0208501	4790/7124	2	NFKB1/TNF
hsa05120	hsa05120	Epithelial cell signaling in Helicobacter pylori infection	2020-02-27	70/7926	0.023409	0.0462177	0.0208501	4790/6352	2	NFKB1/CCL5
hsa05165	hsa05165	Human papillomavirus infection	2020-04-27	330/7926	0.0242858	0.047342	0.0213573	4790/7124/5743/355	4	NFKB1/TNF/PTGS2/FAS
hsa03320	hsa03320	PPAR signaling pathway	2020-02-27	76/7926	0.027283	0.0525197	0.0236931	336/335	2	APOA2/APOA1
hsa04612	hsa04612	Antigen processing and presentation	2020-02-27	78/7926	0.0286284	0.0544294	0.0245546	7124/3458	2	TNF/IFNG
hsa00983	hsa00983	Drug metabolism - other enzymes	2020-02-27	79/7926	0.0293111	0.0550476	0.0248335	1576/54658	2	CYP3A4/UGT1A1
hsa04151	hsa04151	PI3K-Akt signaling pathway	2020-04-27	354/7926	0.0304555	0.0565079	0.0254923	4790/3630/3569/3565	4	NFKB1/INS/IL6/IL4
hsa04662	hsa04662	B cell receptor signaling pathway	2020-02-27	82/7926	0.0313981	0.0575632	0.0259684	4790/2353	2	NFKB1/FOS
hsa04211	hsa04211	Longevity regulating pathway	2020-02-27	89/7926	0.0364897	0.0661108	0.0298244	4790/3630	2	NFKB1/INS
hsa05222	hsa05222	Small cell lung cancer	2020-02-27	92/7926	0.0387639	0.0694144	0.0313148	4790/5743	2	NFKB1/PTGS2
hsa04350	hsa04350	TGF-beta signaling pathway	2020-02-27	94/7926	0.0403097	0.0713528	0.0321892	7124/3458	2	TNF/IFNG
hsa05215	hsa05215	Prostate cancer	2020-02-27	97/7926	0.0426721	0.0746762	0.0336885	4790/3630	2	NFKB1/INS
hsa04928	hsa04928	Parathyroid hormone synthesis, secretion and action	2020-02-27	106/7926	0.0500625	0.086625	0.039079	632/2353	2	BGLAP/FOS
hsa04071	hsa04071	Sphingolipid signaling pathway	2020-02-27	119/7926	0.0614887	0.105214	0.047465	4790/7124	2	NFKB1/TNF
hsa04152	hsa04152	AMPK signaling pathway	2020-02-27	120/7926	0.0624021	0.105604	0.0476407	3952/3630	2	LEP/INS
hsa04926	hsa04926	Relaxin signaling pathway	2020-02-27	129/7926	0.0708311	0.118565	0.053488	4790/2353	2	NFKB1/FOS
hsa04614	hsa04614	Renin-angiotensin system	2020-01-27	23/7926	0.0755837	0.12516	0.0564632	1636	1	ACE
hsa04977	hsa04977	Vitamin digestion and absorption	2020-01-27	24/7926	0.0787419	0.129003	0.0581967	335	1	APOA1
hsa04950	hsa04950	Maturity onset diabetes of the young	2020-01-27	26/7926	0.0850272	0.137834	0.0621805	3630	1	INS
hsa05206	hsa05206	MicroRNAs in cancer	2020-03-27	310/7926	0.0868506	0.139323	0.0628524	5243/4790/5743	3	ABCB1/NFKB1/PTGS2
hsa00053	hsa00053	Ascorbate and aldarate metabolism	2020-01-27	27/7926	0.0881543	0.139956	0.0631382	54658	1	UGT1A1
hsa04150	hsa04150	mTOR signaling pathway	2020-02-27	153/7926	0.0949667	0.147726	0.0666433	7124/3630	2	TNF/INS
hsa04921	hsa04921	Oxytocin signaling pathway	2020-02-27	153/7926	0.0949667	0.147726	0.0666433	5743/2353	2	PTGS2/FOS
hsa04218	hsa04218	Cellular senescence	2020-02-27	160/7926	0.102408	0.157709	0.0711469	4790/3569	2	NFKB1/IL6
hsa00040	hsa00040	Pentose and glucuronate interconversions	2020-01-27	34/7926	0.109758	0.167353	0.0754978	54658	1	UGT1A1
hsa04960	hsa04960	Aldosterone-regulated sodium reabsorption	2020-01-27	37/7926	0.118865	0.179462	0.0809605	3630	1	INS
hsa04975	hsa04975	Fat digestion and absorption	2020-01-27	41/7926	0.130868	0.194524	0.0877553	335	1	APOA1
hsa05202	hsa05202	Transcriptional misregulation in cancer	2020-02-27	186/7926	0.131367	0.194524	0.0877553	4790/3569	2	NFKB1/IL6
hsa00860	hsa00860	Porphyrin and chlorophyll metabolism	2020-01-27	42/7926	0.133844	0.195879	0.0883666	54658	1	UGT1A1
hsa04062	hsa04062	Chemokine signaling pathway	2020-02-27	189/7926	0.134826	0.195879	0.0883666	4790/6352	2	NFKB1/CCL5
hsa02010	hsa02010	ABC transporters	2020-01-27	45/7926	0.142714	0.203499	0.0918041	5243	1	ABCB1
hsa03050	hsa03050	Proteasome	2020-01-27	45/7926	0.142714	0.203499	0.0918041	3458	1	IFNG
hsa05205	hsa05205	Proteoglycans in cancer	2020-02-27	204/7926	0.152429	0.215359	0.0971544	7124/355	2	TNF/FAS
hsa05030	hsa05030	Cocaine addiction	2020-01-27	49/7926	0.154404	0.216165	0.0975181	4790	1	NFKB1
hsa05014	hsa05014	Amyotrophic lateral sclerosis (ALS)	2020-01-27	51/7926	0.160191	0.222247	0.100262	7124	1	TNF
hsa04024	hsa04024	cAMP signaling pathway	2020-02-27	216/7926	0.166839	0.229403	0.10349	4790/2353	2	NFKB1/FOS
hsa04370	hsa04370	VEGF signaling pathway	2020-01-27	59/7926	0.182961	0.249345	0.112487	5743	1	PTGS2
hsa04014	hsa04014	Ras signaling pathway	2020-02-27	232/7926	0.186422	0.251833	0.113609	4790/3630	2	NFKB1/INS
hsa04213	hsa04213	Longevity regulating pathway - multiple species	2020-01-27	62/7926	0.191346	0.256237	0.115596	3630	1	INS
hsa00590	hsa00590	Arachidonic acid metabolism	2020-01-27	63/7926	0.194122	0.257714	0.116262	5743	1	PTGS2
hsa05131	hsa05131	Shigellosis	2020-01-27	67/7926	0.205136	0.26772	0.120776	4790	1	NFKB1
hsa05221	hsa05221	Acute myeloid leukemia	2020-01-27	67/7926	0.205136	0.26772	0.120776	4790	1	NFKB1
hsa05031	hsa05031	Amphetamine addiction	2020-01-27	68/7926	0.207867	0.269005	0.121355	2353	1	FOS
hsa04924	hsa04924	Renin secretion	2020-01-27	69/7926	0.210589	0.270256	0.12192	1636	1	ACE
hsa04115	hsa04115	p53 signaling pathway	2020-01-27	72/7926	0.2187	0.278346	0.12557	355	1	FAS
hsa01524	hsa01524	Platinum drug resistance	2020-01-27	73/7926	0.221386	0.279455	0.12607	355	1	FAS
hsa04918	hsa04918	Thyroid hormone synthesis	2020-01-27	74/7926	0.224063	0.280534	0.126557	213	1	ALB
hsa05212	hsa05212	Pancreatic cancer	2020-01-27	76/7926	0.229391	0.282609	0.127493	4790	1	NFKB1
hsa05220	hsa05220	Chronic myeloid leukemia	2020-01-27	76/7926	0.229391	0.282609	0.127493	4790	1	NFKB1
hsa01521	hsa01521	EGFR tyrosine kinase inhibitor resistance	2020-01-27	79/7926	0.237316	0.287769	0.129821	3569	1	IL6
hsa04610	hsa04610	Complement and coagulation cascades	2020-01-27	79/7926	0.237316	0.287769	0.129821	1191	1	CLU
hsa04911	hsa04911	Insulin secretion	2020-01-27	86/7926	0.255504	0.30502	0.137603	3630	1	INS
hsa05210	hsa05210	Colorectal cancer	2020-01-27	86/7926	0.255504	0.30502	0.137603	2353	1	FOS
hsa05150	hsa05150	Staphylococcus aureus infection	2020-01-27	96/7926	0.280764	0.32836	0.148132	3586	1	IL10
hsa05414	hsa05414	Dilated cardiomyopathy (DCM)	2020-01-27	96/7926	0.280764	0.32836	0.148132	7124	1	TNF
hsa04713	hsa04713	Circadian entrainment	2020-01-27	97/7926	0.283244	0.32836	0.148132	2353	1	FOS
hsa01522	hsa01522	Endocrine resistance	2020-01-27	98/7926	0.285716	0.32836	0.148132	2353	1	FOS
hsa05231	hsa05231	Choline metabolism in cancer	2020-01-27	98/7926	0.285716	0.32836	0.148132	2353	1	FOS
hsa04914	hsa04914	Progesterone-mediated oocyte maturation	2020-01-27	99/7926	0.28818	0.328738	0.148303	3630	1	INS
hsa04750	hsa04750	Inflammatory mediator regulation of TRP channels	2020-01-27	100/7926	0.290635	0.329102	0.148467	3553	1	IL1B
hsa04725	hsa04725	Cholinergic synapse	2020-01-27	112/7926	0.319472	0.359115	0.162007	2353	1	FOS
hsa04080	hsa04080	Neuroactive ligand-receptor interaction	2020-02-27	340/7926	0.323518	0.361027	0.162869	2908/3952	2	NR3C1/LEP
hsa04726	hsa04726	Serotonergic synapse	2020-01-27	115/7926	0.326503	0.361737	0.16319	5743	1	PTGS2
hsa04722	hsa04722	Neurotrophin signaling pathway	2020-01-27	119/7926	0.335769	0.366726	0.16544	4790	1	NFKB1
hsa04935	hsa04935	Growth hormone synthesis, secretion and action	2020-01-27	119/7926	0.335769	0.366726	0.16544	2353	1	FOS
hsa04114	hsa04114	Oocyte meiosis	2020-01-27	128/7926	0.35617	0.386269	0.174257	3630	1	INS
hsa04728	hsa04728	Dopaminergic synapse	2020-01-27	131/7926	0.362836	0.390746	0.176276	2353	1	FOS
hsa04140	hsa04140	Autophagy - animal	2020-01-27	137/7926	0.375968	0.39885	0.179932	3630	1	INS
hsa04910	hsa04910	Insulin signaling pathway	2020-01-27	137/7926	0.375968	0.39885	0.179932	3630	1	INS
hsa04915	hsa04915	Estrogen signaling pathway	2020-01-27	138/7926	0.378131	0.39885	0.179932	2353	1	FOS
hsa05224	hsa05224	Breast cancer	2020-01-27	147/7926	0.397277	0.412159	0.185937	2353	1	FOS
hsa04072	hsa04072	Phospholipase D signaling pathway	2020-01-27	148/7926	0.399369	0.412159	0.185937	3630	1	INS
hsa04723	hsa04723	Retrograde endocannabinoid signaling	2020-01-27	148/7926	0.399369	0.412159	0.185937	5743	1	PTGS2
hsa05226	hsa05226	Gastric cancer	2020-01-27	149/7926	0.401454	0.412159	0.185937	5243	1	ABCB1
hsa04022	hsa04022	cGMP-PKG signaling pathway	2020-01-27	167/7926	0.437813	0.446512	0.201434	3630	1	INS
hsa05203	hsa05203	Viral carcinogenesis	2020-01-27	201/7926	0.500773	0.507362	0.228885	4790	1	NFKB1
hsa04015	hsa04015	Rap1 signaling pathway	2020-01-27	210/7926	0.516267	0.519642	0.234425	3630	1	INS
hsa04810	hsa04810	Regulation of actin cytoskeleton	2020-01-27	213/7926	0.521328	0.521328	0.235186	3630	1	INS
